# Supplementary material for: Synthesis, spectroscopic, electrochemical and computational studies of rhenium(i) dicarbonyl complexes based on meridionally-coordinated 2,2′:6′,2′′-terpyridine
Source: Royal Society of Chemistry journal article supplement (doi:10.1039/c3dt51251g), 2013-01-01
Supplement: c3dt51251g.pdf [file c3dt51251g.pdf]

Synthesis, spectroscopic, electrochemical and  
computational studies of rhenium(I) dicarbonyl  
complexes based on meridionally-coordinated  
2,2':6',2''-terpyridine

Supporting Information

*Blaise A. Frenzel, Josh E. Schumaker, Daniel R. Black and Sean E. Hightower<sup>†</sup>*

<sup>†</sup>Department of Chemistry, University of North Dakota, 151 Cornell Street, Stop 9024,  
Grand Forks, ND 58202-9024

## 1. Computational

|                                                                                                                                                                                                                        |     |
|------------------------------------------------------------------------------------------------------------------------------------------------------------------------------------------------------------------------|-----|
| <b>Table S1-A.</b> Optimized geometry of <i>mer,cis</i> -Re(tpy-κ <sup>3</sup> N)(CO) <sub>2</sub> Cl (1) in the singlet ground state.                                                                                 | S5  |
| <b>Table S1-B.</b> Calculated singlet excited states of for <i>mer,cis</i> -Re(tpy-κ <sup>3</sup> N)(CO) <sub>2</sub> Cl (1) in acetonitrile.                                                                          | S6  |
| <b>Table S1-C.</b> Calculated triplet excited states of for <i>mer,cis</i> -Re(tpy-κ <sup>3</sup> N)(CO) <sub>2</sub> Cl (1) in acetonitrile.                                                                          | S8  |
| <b>Table S1-D.</b> The Fragment Analysis Based on Mullikan Populations for <i>mer,cis</i> -Re(tpy-κ <sup>3</sup> N)(CO) <sub>2</sub> Cl (1) in the Singlet Ground State.                                               | S9  |
| <b>Table S3-A.</b> Optimized geometry of <i>mer,cis</i> -[Re(tpy-κ <sup>3</sup> N)(CO) <sub>2</sub> NCCH <sub>3</sub> ] <sup>+</sup> (3) in the singlet ground state with E(B3LYP) = - 1180.9767 au.                   | S10 |
| <b>Table S3-B.</b> Calculated singlet excited states of for <i>mer,cis</i> -[Re(tpy-κ <sup>3</sup> N)(CO) <sub>2</sub> (NCCH <sub>3</sub> )] <sup>+</sup> (3) in acetonitrile.                                         | S11 |
| <b>Table S3-C.</b> Calculated triplet excited states of for <i>mer,cis</i> -[Re(tpy-κ <sup>3</sup> N)(CO) <sub>2</sub> (NCCH <sub>3</sub> )] <sup>+</sup> (3) in acetonitrile.                                         | S13 |
| <b>Table S3-D.</b> The Fragment Analysis Based on Mullikan Populations for <i>mer,cis</i> -[Re(tpy-κ <sup>3</sup> N)(CO) <sub>2</sub> NCCH <sub>3</sub> ] <sup>+</sup> (3) in the Singlet Ground State.                | S14 |
| <b>Table S4-A.</b> Optimized geometry of <i>mer,cis</i> -Re(tpy-κ <sup>3</sup> N)(CO) <sub>2</sub> CN (4) in the singlet ground state.                                                                                 | S15 |
| <b>Table S4-B.</b> Calculated singlet excited states of for <i>mer,cis</i> -Re(tpy-κ <sup>3</sup> N)(CO) <sub>2</sub> CN (4) in acetonitrile.                                                                          | S16 |
| <b>Table S4-C.</b> Calculated triplet excited states of for <i>mer,cis</i> -Re(tpy-κ <sup>3</sup> N)(CO) <sub>2</sub> CN (4) in acetonitrile.                                                                          | S18 |
| <b>Table S4-D.</b> The Fragment Analysis Based on Mullikan Populations for <i>mer,cis</i> -Re(tpy-κ <sup>3</sup> N)(CO) <sub>2</sub> CN (4) in the Singlet Ground State.                                               | S19 |
| <b>Table S5-A.</b> Optimized geometry of <i>mer,cis</i> -[Re(tpy-κ <sup>3</sup> N)(CO) <sub>2</sub> (NC <sub>5</sub> H <sub>5</sub> )] <sup>+</sup> (5) in the singlet ground state.                                   | S20 |
| <b>Table S5-B.</b> Calculated singlet excited states of for <i>mer,cis</i> -[Re(tpy-κ <sup>3</sup> N)(CO) <sub>2</sub> (NC <sub>5</sub> H <sub>5</sub> )] <sup>+</sup> (5) in acetonitrile.                            | S22 |
| <b>Table S5-C.</b> Calculated triplet excited states of for <i>mer,cis</i> -[Re(tpy-κ <sup>3</sup> N)(CO) <sub>2</sub> (NC <sub>5</sub> H <sub>5</sub> )] <sup>+</sup> (5) in acetonitrile.                            | S24 |
| <b>Table S5-D.</b> The Fragment Analysis Based on Mullikan Populations for <i>mer,cis</i> -[Re(tpy-κ <sup>3</sup> N)(CO) <sub>2</sub> (NC <sub>5</sub> H <sub>5</sub> )] <sup>+</sup> (5) in the Singlet Ground State. | S25 |
| <b>Table S6-A.</b> Optimized geometry of <i>mer,cis</i> -[Re(tpy-κ <sup>3</sup> N)(CO) <sub>2</sub> (PMe <sub>3</sub> ) <sub>3</sub> ] <sup>+</sup> (6) in the singlet ground state.                                   | S26 |
| <b>Table S6-B.</b> Calculated singlet excited states of for <i>mer,cis</i> -[Re(tpy-κ <sup>3</sup> N)(CO) <sub>2</sub> (PMe <sub>3</sub> ) <sub>3</sub> ] <sup>+</sup> (6) in acetonitrile.                            | S28 |
| <b>Table S6-C.</b> Calculated triplet excited states of for <i>mer,cis</i> -[Re(tpy-κ <sup>3</sup> N)(CO) <sub>2</sub> (PMe <sub>3</sub> ) <sub>3</sub> ] <sup>+</sup> (6) in acetonitrile.                            | S30 |
| <b>Table S6-D.</b> The Fragment Analysis Based on Mullikan Populations for <i>mer,cis</i> -[Re(tpy-κ <sup>3</sup> N)(CO) <sub>2</sub> (PMe <sub>3</sub> ) <sub>3</sub> ] <sup>+</sup> (6) in the Singlet Ground State. | S31 |
| <b>Table S7-A.</b> Optimized geometry of <i>mer,cis</i> -[Re(tpy-κ <sup>3</sup> N)(CO) <sub>2</sub> (PEt <sub>3</sub> ) <sub>3</sub> ] <sup>+</sup> (7) in the singlet ground state.                                   | S32 |
| <b>Table S7-B.</b> Calculated singlet excited states of for <i>mer,cis</i> -[Re(tpy-κ <sup>3</sup> N)(CO) <sub>2</sub> (PEt <sub>3</sub> ) <sub>3</sub> ] <sup>+</sup> (7) in acetonitrile.                            | S34 |
| <b>Table S7-C.</b> Calculated triplet excited states of for <i>mer,cis</i> -[Re(tpy-κ <sup>3</sup> N)(CO) <sub>2</sub> (PEt <sub>3</sub> ) <sub>3</sub> ] <sup>+</sup> (7) in acetonitrile.                            | S36 |

|                                                                                                                                                                                                                                            |     |
|--------------------------------------------------------------------------------------------------------------------------------------------------------------------------------------------------------------------------------------------|-----|
| <b>Table S7-D.</b> The Fragment Analysis Based on Mullikan Populations for <i>mer,cis</i> -[Re(tpy- $\kappa^3N$ )(CO) <sub>2</sub> (PEt <sub>3</sub> ) <sup>+</sup> (7) in the Singlet Ground State.                                       | S37 |
| <b>Table S8-A.</b> Optimized geometry of <i>mer,cis</i> -[Re(tpy- $\kappa^3N$ )(CO) <sub>2</sub> (PPh <sub>3</sub> ) <sup>+</sup> (8) in the singlet ground state.                                                                         | S38 |
| <b>Table S8-B.</b> Calculated singlet excited states of for <i>mer,cis</i> -[Re(tpy- $\kappa^3N$ )(CO) <sub>2</sub> (PPh <sub>3</sub> ) <sup>+</sup> (8) in acetonitrile.                                                                  | S40 |
| <b>Table S8-C.</b> Calculated triplet excited states of for <i>mer,cis</i> -[Re(tpy- $\kappa^3N$ )(CO) <sub>2</sub> (PPh <sub>3</sub> ) <sup>+</sup> (8) in acetonitrile.                                                                  | S42 |
| <b>Table S8-D.</b> The Fragment Analysis Based on Mullikan Populations for <i>mer,cis</i> -[Re(tpy- $\kappa^3N$ )(CO) <sub>2</sub> (PPh <sub>3</sub> ) <sup>+</sup> (8) in the Singlet Ground State.                                       | S43 |
| <b>Table S9-A.</b> Optimized geometry of <i>mer,cis</i> -[Re(tpy- $\kappa^3N$ )(CO) <sub>2</sub> (P(OMe) <sub>3</sub> ) <sup>+</sup> (9) in the singlet ground state.                                                                      | S44 |
| <b>Table S9-B.</b> Calculated singlet excited states of for <i>mer,cis</i> -[Re(tpy- $\kappa^3N$ )(CO) <sub>2</sub> (P(OMe) <sub>3</sub> ) <sup>+</sup> (9) in acetonitrile.                                                               | S46 |
| <b>Table S9-C.</b> Calculated triplet excited states of for <i>mer,cis</i> -[Re(tpy- $\kappa^3N$ )(CO) <sub>2</sub> (P(OMe) <sub>3</sub> ) <sup>+</sup> (9) in acetonitrile.                                                               | S48 |
| <b>Table S9-D.</b> The Fragment Analysis Based on Mullikan Populations for <i>mer,cis</i> -[Re(tpy- $\kappa^3N$ )(CO) <sub>2</sub> (P(OMe) <sub>3</sub> ) <sup>+</sup> (9) in the Singlet Ground State.                                    | S49 |
| <b>Table S10-A.</b> Optimized geometry of <i>mer,cis</i> -[Re(tpy- $\kappa^3N$ )(CO) <sub>2</sub> (P(OEt) <sub>3</sub> ) <sup>+</sup> (10) in the singlet ground state.                                                                    | S50 |
| <b>Table S10-B.</b> Calculated singlet excited states of for <i>mer,cis</i> -[Re(tpy- $\kappa^3N$ )(CO) <sub>2</sub> (P(OEt) <sub>3</sub> ) <sup>+</sup> (10) in acetonitrile.                                                             | S52 |
| <b>Table S10-C.</b> Calculated triplet excited states of for <i>mer,cis</i> -[Re(tpy- $\kappa^3N$ )(CO) <sub>2</sub> (P(OEt) <sub>3</sub> ) <sup>+</sup> (10) in acetonitrile.                                                             | S54 |
| <b>Table S10-D.</b> The Fragment Analysis Based on Mullikan Populations for <i>mer,cis</i> -[Re(tpy- $\kappa^3N$ )(CO) <sub>2</sub> (P(OEt) <sub>3</sub> ) <sup>+</sup> (10) in the Singlet Ground State.                                  | S55 |
| <br>                                                                                                                                                                                                                                       |     |
| <b>2. Electrochemical Parameterization</b>                                                                                                                                                                                                 |     |
| <br>                                                                                                                                                                                                                                       |     |
| <b>Table S11.</b> Calculated values $E$ and $\sum E_L(L)$ .                                                                                                                                                                                | S56 |
| <br>                                                                                                                                                                                                                                       |     |
| <b>3. UV-Vis Spectra</b>                                                                                                                                                                                                                   |     |
| <br>                                                                                                                                                                                                                                       |     |
| <b>Figure S1.</b> UV/vis spectra of <i>mer,cis</i> -Re(tpy- $\kappa^3N$ )(CO) <sub>2</sub> L (where L = Cl <sup>-</sup> , Br <sup>-</sup> , <sup>-</sup> OSO <sub>2</sub> CF <sub>3</sub> and CN <sup>-</sup> ) complexes.                 | S57 |
| <b>Figure S2.</b> UV/vis spectra of <i>mer,cis</i> -[Re(tpy- $\kappa^3N$ )(CO) <sub>2</sub> (L)] <sup>+</sup> (where L = P(OMe) <sub>3</sub> , P(OEt) <sub>3</sub> , PPh <sub>3</sub> , PMe <sub>3</sub> and PEt <sub>3</sub> ) complexes. | S58 |
| <b>Figure S3.</b> UV/vis spectra of <i>mer,cis</i> -[Re(tpy- $\kappa^3N$ )(CO) <sub>2</sub> (L)] <sup>+</sup> (where L = NC <sub>5</sub> H <sub>5</sub> and NCCH <sub>3</sub> ) complexes.                                                 | S59 |
| <br>                                                                                                                                                                                                                                       |     |
| <b>4. Nuclear Magnetic Resonance (NMR) Spectra</b>                                                                                                                                                                                         |     |
| <br>                                                                                                                                                                                                                                       |     |
| <b>Figure S4.</b> Individual nuclear magnetic resonance (NMR) spectra for <i>mer,cis</i> -[Re(tpy- $\kappa^3N$ )(CO) <sub>2</sub> (L)] <sup>n</sup> complexes.                                                                             | S60 |

## 5. Excitation and Emission Spectra

**Figure S5.** Excitation and emission spectra for *mer,cis*-[Re(tpy- $\kappa^3N$ )(CO)<sub>2</sub>(P(OEt)<sub>3</sub>)<sup>+</sup> (**10**) at 77 K. S64

## 1. Computational

**Table S1-A.** Optimized geometry of *mer,cis*-Re(tpy- $\kappa^3$ N)(CO)<sub>2</sub>Cl (1) in the singlet ground state with E(B3LYP) = -1508.5991 au.

|    |             |             |             |
|----|-------------|-------------|-------------|
| Re | 1.26104279  | 0.32410178  | -0.22771282 |
| C  | 1.82739943  | 0.19670334  | -2.01960131 |
| O  | 2.19834640  | 0.11732063  | -3.13455134 |
| C  | 3.08047316  | 0.31331409  | 0.34337271  |
| O  | 4.19348166  | 0.30763315  | 0.72427902  |
| Cl | 0.51087918  | 0.50523548  | 2.25828532  |
| N  | -0.80621029 | 0.34963141  | -0.61365748 |
| C  | -1.47888724 | -0.82069153 | -0.60910911 |
| C  | -1.42233357 | 1.54214255  | -0.75605038 |
| C  | -2.86196567 | -0.82693437 | -0.81076405 |
| C  | -0.62748484 | -2.00401350 | -0.35458782 |
| C  | -2.80411243 | 1.58976111  | -0.96071491 |
| C  | -0.51477904 | 2.70597225  | -0.64902508 |
| C  | -3.51677501 | 0.39093836  | -0.99608038 |
| H  | -3.42588213 | -1.75506866 | -0.81441304 |
| C  | -1.12838694 | -3.30659146 | -0.33672211 |
| N  | 0.70209461  | -1.75160688 | -0.12602659 |
| H  | -3.32264193 | 2.53643466  | -1.08107333 |
| C  | -0.95429309 | 4.02284652  | -0.79185409 |
| N  | 0.80247714  | 2.42123532  | -0.39023386 |
| H  | -4.59279996 | 0.40678503  | -1.15533601 |
| C  | -0.27385574 | -4.37581563 | -0.07948710 |
| H  | -2.18334802 | -3.48576260 | -0.52476685 |
| C  | 1.51800584  | -2.79469565 | 0.12746304  |
| C  | -0.04944211 | 5.07423111  | -0.66756094 |
| H  | -2.00104879 | 4.22658937  | -0.99960516 |
| C  | 1.66790375  | 3.44787256  | -0.26803931 |
| C  | 1.07382599  | -4.11244863 | 0.15792221  |
| H  | -0.65698625 | -5.39384284 | -0.06539274 |
| H  | 2.55891307  | -2.54380126 | 0.30678234  |
| C  | 1.28587143  | 4.77886604  | -0.39990123 |
| H  | -0.38458902 | 6.10326395  | -0.77794376 |
| H  | 2.69710846  | 3.17241363  | -0.05942154 |
| H  | 1.78195869  | -4.91075123 | 0.36631979  |
| H  | 2.03168758  | 5.56252158  | -0.29106245 |

**Table S2-B.** Calculated singlet excited states of for *mer,cis-Re(tpy-κ<sup>3</sup>N)(CO)<sub>2</sub>Cl* (1) in acetonitrile.

| # <sup>a</sup> | E <sub>VER</sub> <sup>b</sup> |                       |      | f <sup>c</sup> | Assignment; MO# →MO# <sup>d</sup>                    |
|----------------|-------------------------------|-----------------------|------|----------------|------------------------------------------------------|
|                | nm                            | 1000 cm <sup>-1</sup> | eV   |                |                                                      |
| 1              | 664.7                         | 15.0                  | 1.87 | 0.0258         | 91 →92(+98%)                                         |
| 2              | 581.6                         | 17.2                  | 2.13 | 0.0088         | 90 →92(+99%)                                         |
| 3              | 532.9                         | 18.8                  | 2.33 | 0.0056         | 91 →93(+86%) 89 →92(12%)                             |
| 4              | 486.0                         | 20.6                  | 2.55 | 0.0031         | 90 →93(+91%) 89 →92(+25%)                            |
| 5              | 461.0                         | 21.7                  | 2.69 | 0.0732         | 89 →92(+59%) 90 →93(+24%)<br>91 →93(+12)             |
| 6              | 430.0                         | 23.3                  | 2.88 | 0.0149         | 89 →93(+98%)                                         |
| 7              | 378.7                         | 26.4                  | 3.27 | 0.0578         | 91 →94(+94%)                                         |
| 8              | 370.0                         | 27.0                  | 3.35 | 0.0137         | 91 →95(+77%) 90 →95(+19%)                            |
| 9              | 352.9                         | 28.3                  | 3.51 | 0.0113         | 90 →94(+96%)                                         |
| 10             | 346.5                         | 28.9                  | 3.58 | 0.0167         | 90 →95(+79%) 91 →95(16%)                             |
| 11             | 325.1                         | 30.8                  | 3.81 | 0.1230         | 88 →92(+67%) 86 →92(+21%)<br>89 →95(8%)              |
| 12             | 321.3                         | 31.1                  | 3.86 | 0.0255         | 89 →95(+90%)                                         |
| 13             | 321.0                         | 31.1                  | 3.86 | 0.0039         | 89 →94(+98%)                                         |
| 14             | 314.1                         | 31.8                  | 3.95 | 0.0175         | 87 →92(+95%)                                         |
| 15             | 310.1                         | 32.2                  | 4.00 | 0.1465         | 86 →92(+37%) 91 →96(33%)<br>91 →97(12%) 88 →92(12%)  |
| 16             | 309.7                         | 32.3                  | 4.00 | 0.1880         | 86 →92(+34%) 91 →96(+26%)<br>91 →97(+24%) 88 →92(8%) |
| 17             | 300.6                         | 33.3                  | 4.12 | 0.0355         | 91 →97(+57%) 91 →96(38%)                             |
| 18             | 293.7                         | 34.0                  | 4.22 | 0.0024         | 90 →97(+59%) 90 →96(+29%)<br>91 →98(+6%)             |
| 19             | 289.1                         | 34.6                  | 4.29 | 0.0285         | 86 →93(+66%) 88 →93(+31%)                            |
| 20             | 287.8                         | 34.8                  | 4.31 | 0.0873         | 87 →93(+95%)                                         |
| 21             | 284.5                         | 35.2                  | 4.36 | 0.0025         | 90 →96(+49%) 91 →98(36%)<br>90 →97(8%)               |
| 22             | 282.3                         | 35.4                  | 4.39 | 0.0000         | 91 →98(+46%) 90 →97(27%)<br>90 →96(+18%)             |
| 23             | 277.3                         | 36.1                  | 4.47 | 0.1022         | 88 →93(+55%) 86 →93(30%)<br>89 →96(+9%)              |
| 24             | 272.6                         | 36.7                  | 4.55 | 0.0108         | 90 →98(+89%)                                         |
| 25             | 271.3                         | 36.9                  | 4.57 | 0.0013         | 91 →100(+57%) 89 →97(23%)<br>89 →96(6%)              |

|    |       |      |      |        |                                                                         |
|----|-------|------|------|--------|-------------------------------------------------------------------------|
| 26 | 268.6 | 37.2 | 4.62 | 0.0207 | 85 →92(+83%) 84 →92(+11%)                                               |
| 27 | 263.0 | 38.0 | 4.71 | 0.0426 | 89 →96(+64%) 84 →92(+19%)<br>91 →100(+8%)                               |
| 28 | 255.9 | 39.1 | 4.84 | 0.1679 | 84 →92(+57%) 89 →96(11%)<br>91 →99(+8%) 85 →92(7%)                      |
| 29 | 253.6 | 39.4 | 4.89 | 0.0334 | 85 →93(+88%) 88 →94(+6%)                                                |
| 30 | 251.8 | 39.7 | 4.92 | 0.0420 | 89 →98(+38%) 90 →<br>100(+29%) 89 →97(10%) 91 →<br>102(+6%) 89 →96(+6%) |

<sup>a</sup> # is the state. <sup>b</sup>E<sub>VER</sub> is the energy of the vertical transition. <sup>c</sup>*f* is the oscillator strength. <sup>d</sup>Assignment; MO# →MO# is the occupied and the virtual orbitals that define the transition. The value and phase (+/-) of the transition coefficient for each transition is given in parentheses.

**Table S1-C.** Calculated triplet excited states of for *mer,cis*-Re(tpy- $\kappa^3N$ )(CO)<sub>2</sub>Cl (1) in acetonitrile.

| # <sup>a</sup> | E <sub>VER</sub> <sup>b</sup> |                       |      | <i>f</i> <sup>c</sup> | Assignment; MO# →MO# <sup>d</sup> |
|----------------|-------------------------------|-----------------------|------|-----------------------|-----------------------------------|
|                | nm                            | 1000 cm <sup>-1</sup> | eV   |                       |                                   |
| 1              | 716.7                         | 14.0                  | 1.73 | 0.0000                | 91 →92(+98%)                      |
| 2              | 602.8                         | 16.6                  | 2.06 | 0.0000                | 90 →92(+99%)                      |
| 3              | 585.8                         | 17.1                  | 2.12 | 0.0000                | 91 →93(+92%)                      |
| 4              | 538.2                         | 18.6                  | 2.30 | 0.0000                | 89 →92(+96%)                      |
| 5              | 494.6                         | 20.2                  | 2.51 | 0.0000                | 90 →93(+95%)                      |
| 6              | 444.0                         | 22.5                  | 2.79 | 0.0000                | 89 →93(+97%)                      |
| 7              | 409.4                         | 24.4                  | 3.03 | 0.0000                | 91 →95(+71%) 88 →93(10%)          |
| 8              | 402.2                         | 24.9                  | 3.08 | 0.0000                | 91 →94(+89%)                      |
| 9              | 396.3                         | 25.2                  | 3.13 | 0.0000                | 88 →93(+55%) 91 →95(+19%)         |
| 10             | 383.4                         | 26.1                  | 3.23 | 0.0000                | 88 →92(+80%)                      |

<sup>a</sup> # is the state. <sup>b</sup>E<sub>VER</sub> is the energy of the vertical transition. <sup>c</sup>*f* is the oscillator strength. <sup>d</sup>Assignment; MO# →MO# is the occupied and the virtual orbitals that define the transition. The value and phase (+/-) of the transition coefficient for each transition is given in parentheses.



Table S1-D. The Fragment Analysis Based on Mullikan Populations for *mer,cis*-Re(tpy-κ<sup>3</sup>N)(CO)<sub>2</sub>Cl (1) in the Singlet Ground State.<sup>a</sup>

| molecular orbital                                   | E, eV | Re    |                |                |                |                            |                 |                 |                                          |                 |                    | tpy <sup>b</sup>   |                    | CO <sup>c</sup>    |       | Cl <sup>d</sup> |  |
|-----------------------------------------------------|-------|-------|----------------|----------------|----------------|----------------------------|-----------------|-----------------|------------------------------------------|-----------------|--------------------|--------------------|--------------------|--------------------|-------|-----------------|--|
|                                                     |       | s     | P <sub>x</sub> | P <sub>y</sub> | P <sub>z</sub> | d <sub>x<sup>2</sup></sub> | d <sub>xz</sub> | d <sub>yz</sub> | d <sub>x<sup>2</sup>-y<sup>2</sup></sub> | d <sub>xy</sub> | ∑ <sub>s,p,d</sub> | ∑ <sub>s,p,d</sub> | ∑ <sub>s,p,d</sub> | ∑ <sub>s,p,d</sub> |       |                 |  |
| 85 (O)                                              | -7.11 | 0.00  | 0.00           | 0.01           | 0.00           | 0.01                       | 0.00            | 0.67            | 0.00                                     | 0.01            | 0.00               | 0.00               | 0.01               | 98.80              | 0.16  | 0.35            |  |
| 86 (O)                                              | -6.78 | 0.67  | 0.62           | 0.02           | 2.53           | 7.48                       | 0.07            | 0.09            | 0.12                                     | 0.00            | 0.12               | 0.00               | 0.00               | 3.39               | 10.39 | 74.92           |  |
| 87 (O)                                              | -6.23 | 0.01  | 0.49           | 0.00           | 0.06           | 4.08                       | 16.34           | 0.00            | 1.66                                     | 0.11            | 0.00               | 0.00               | 0.11               | 9.32               | 9.66  | 58.26           |  |
| 88 (O)                                              | -6.10 | 0.00  | 0.00           | 1.55           | 0.01           | 0.15                       | 0.01            | 12.40           | 0.05                                     | 0.07            | 0.05               | 0.07               | 0.07               | 7.94               | 1.78  | 76.05           |  |
| 89 (O)                                              | -5.22 | 0.09  | 2.39           | 0.00           | 0.11           | 6.78                       | 26.99           | 0.00            | 1.68                                     | 0.10            | 0.00               | 0.10               | 0.10               | 6.95               | 17.50 | 37.40           |  |
| 90 (O)                                              | -5.13 | 0.00  | 0.00           | 5.14           | 0.02           | 0.03                       | 0.24            | 2.17            | 0.22                                     | 60.40           | 0.22               | 60.40              | 6.63               | 23.92              | 1.23  |                 |  |
| 91 (O)                                              | -4.78 | 0.00  | 0.00           | 0.24           | 0.00           | 0.59                       | 0.00            | 48.34           | 0.11                                     | 5.37            | 0.11               | 5.37               | 13.53              | 14.77              | 17.05 |                 |  |
| HOMO-LUMO gap: 2.284 eV (18422.7 cm <sup>-1</sup> ) |       |       |                |                |                |                            |                 |                 |                                          |                 |                    |                    |                    |                    |       |                 |  |
| 92 (V)                                              | -2.50 | 0.01  | 0.42           | 0.01           | 1.07           | 1.18                       | 1.60            | 0.01            | 0.08                                     | 0.01            | 0.08               | 0.01               | 0.01               | 88.99              | 4.26  | 2.37            |  |
| 93 (V)                                              | -2.29 | 0.00  | 0.00           | 0.17           | 0.00           | 0.03                       | 0.00            | 2.61            | 0.01                                     | 0.01            | 0.01               | 0.01               | 0.01               | 95.75              | 1.33  | 0.08            |  |
| 94 (V)                                              | -1.31 | 0.00  | 0.02           | 0.00           | 0.46           | 0.04                       | 0.00            | 0.00            | 0.01                                     | 0.00            | 0.01               | 0.00               | 0.00               | 99.32              | 0.01  | 0.12            |  |
| 95 (V)                                              | -1.24 | 0.00  | 0.00           | 0.22           | 0.00           | 0.03                       | 0.00            | 2.77            | 0.01                                     | 0.00            | 0.01               | 0.00               | 0.00               | 93.16              | 3.79  | 0.01            |  |
| 96 (V)                                              | -0.58 | 0.00  | 0.05           | 0.00           | 0.12           | 0.06                       | 0.18            | 0.00            | 0.02                                     | 0.00            | 0.02               | 0.00               | 0.00               | 98.29              | 1.18  | 0.09            |  |
| 97 (V)                                              | 0.41  | 0.00  | 0.00           | 0.04           | 0.00           | 0.00                       | 0.00            | 0.21            | 0.00                                     | 0.01            | 0.00               | 0.01               | 0.01               | 99.62              | 0.10  | 0.01            |  |
| 98 (V)                                              | 0.58  | -0.06 | 5.61           | 0.05           | 22.55          | 4.11                       | 1.21            | 0.03            | 2.34                                     | 0.00            | 2.34               | 0.00               | 0.00               | 2.56               | 59.38 | 2.21            |  |
| 99 (V)                                              | 0.79  | 4.40  | 26.46          | 0.06           | 3.89           | 5.43                       | 2.10            | 0.40            | 29.18                                    | 0.13            | 29.18              | 0.13               | 0.13               | 22.90              | 4.07  | 0.97            |  |
| 100 (V)                                             | 0.94  | 0.00  | 0.02           | 34.32          | 0.12           | 0.04                       | 0.08            | 3.42            | 0.08                                     | 13.32           | 0.08               | 13.32              | 7.29               | 40.47              | 40.47 | 0.82            |  |
| 101 (V)                                             | 1.55  | 3.25  | 42.50          | 0.00           | 17.54          | 3.53                       | 0.65            | 0.08            | 1.39                                     | 0.02            | 1.39               | 0.02               | 15.51              | 15.60              | -0.08 |                 |  |

<sup>a</sup>The orbital occupancy status is given in parenthesis (O = occupied, V = virtual). <sup>b</sup>Sum of the percent population for the three nitrogen, fifteen carbon, and eleven hydrogen atoms present in the terpyridine (2,2';6',2''-terpyridine (tpy); C<sub>15</sub>H<sub>11</sub>N<sub>3</sub>) ligand. <sup>c</sup>Sum of the percent population for the two carbon and two oxygen atoms present in the two carbonyl (CO) ligands. <sup>d</sup>Sum of the percent population for the one chlorine (Cl) atom present as the chloro (Cl) ligand.

**Table S3-A.** Optimized geometry of *mer,cis*-[Re(tpy- $\kappa^3N$ )(CO)<sub>2</sub>(NCCH<sub>3</sub>)]<sup>+</sup> (3) in the singlet ground state with E(B3LYP) = - 1180.9767 au.

|    |             |             |             |
|----|-------------|-------------|-------------|
| Re | 0.22738860  | -0.24789843 | -0.08697846 |
| N  | -1.89260719 | -0.56616544 | 0.17308189  |
| C  | -2.79059754 | -0.82912539 | -0.79683687 |
| C  | -2.33618719 | -0.47018519 | 1.46821349  |
| C  | -4.14790078 | -1.00015701 | -0.54239400 |
| H  | -2.38999495 | -0.89738727 | -1.80345946 |
| C  | -3.68583208 | -0.63319694 | 1.78115119  |
| C  | -4.60566690 | -0.89983420 | 0.76926782  |
| H  | -4.82453596 | -1.20820889 | -1.36752261 |
| H  | -4.01959191 | -0.55144818 | 2.81173911  |
| H  | -5.65990655 | -1.02621266 | 1.00584636  |
| N  | -0.05651009 | -0.05010303 | 1.99390453  |
| C  | -1.30287935 | -0.19349407 | 2.49223110  |
| C  | 1.02366234  | 0.15597195  | 2.77695534  |
| C  | -1.51386917 | -0.09144656 | 3.86989826  |
| C  | 0.86454033  | 0.26578276  | 4.16108673  |
| C  | -0.41730248 | 0.14685020  | 4.69880262  |
| H  | -2.50670238 | -0.19887043 | 4.29650521  |
| H  | 1.71570881  | 0.43490088  | 4.81397468  |
| H  | -0.56155485 | 0.23143332  | 5.77367934  |
| C  | 0.50565877  | -0.58897820 | -1.94893706 |
| O  | 0.67848632  | -0.81825968 | -3.08616713 |
| C  | 0.00047181  | 1.59886111  | -0.49216837 |
| O  | -0.13578260 | 2.72892027  | -0.76099498 |
| C  | 2.30384429  | 0.22557865  | 2.03564528  |
| C  | 3.52972890  | 0.44894773  | 2.66287590  |
| N  | 2.22508318  | 0.05009143  | 0.67677838  |
| C  | 4.69875582  | 0.49374841  | 1.90625773  |
| H  | 3.57330438  | 0.58903945  | 3.73923771  |
| C  | 3.36285876  | 0.09086726  | -0.04439091 |
| C  | 4.61194177  | 0.31021753  | 0.52830774  |
| H  | 5.65787499  | 0.66908908  | 2.38866750  |
| H  | 3.24831206  | -0.05536718 | -1.11394143 |
| H  | 5.49431249  | 0.33450309  | -0.10631760 |
| N  | 0.49406222  | -2.36819393 | 0.33196791  |
| C  | 0.63698157  | -3.49683122 | 0.54878571  |
| C  | 0.81825917  | -4.91711982 | 0.81003620  |
| H  | 1.66795012  | -5.06641169 | 1.48783357  |
| H  | -0.08700386 | -5.33013419 | 1.27219588  |
| H  | 1.01338502  | -5.44496671 | -0.13182556 |

**Table S3-B.** Calculated singlet excited states of for *mer,cis*-[Re(tpy- $\kappa^3$ N)(CO)<sub>2</sub>(NCCH<sub>3</sub>)]<sup>+</sup> (3) in acetonitrile.

| # <sup>a</sup> | E <sub>VER</sub> <sup>b</sup> |                       |      | <i>f</i> <sup>c</sup> | Assignment; MO# →MO# <sup>d</sup>                |
|----------------|-------------------------------|-----------------------|------|-----------------------|--------------------------------------------------|
|                | nm                            | 1000 cm <sup>-1</sup> | eV   |                       |                                                  |
| 1              | 598.1                         | 16.7                  | 2.07 | 0.0187                | 93 →94(+98%)                                     |
| 2              | 550.2                         | 18.2                  | 2.25 | 0.0154                | 92 →94(+98%)                                     |
| 3              | 487.6                         | 20.5                  | 2.54 | 0.0051                | 93 →95(+90%) 91 →94(5%)                          |
| 4              | 458.8                         | 21.8                  | 2.70 | 0.0012                | 92 →95(+85%) 91 →94(14%)                         |
| 5              | 421.7                         | 23.7                  | 2.94 | 0.0851                | 91 →94(+76%) 92 →95(+10%)<br>93 →95(+8%)         |
| 6              | 392.0                         | 25.5                  | 3.16 | 0.0133                | 91 →95(+98%)                                     |
| 7              | 355.8                         | 28.1                  | 3.48 | 0.0224                | 93 →96(+91%) 90 →94(+5%)                         |
| 8              | 351.7                         | 28.4                  | 3.53 | 0.0066                | 93 →97(+70%) 92 →97(28%)                         |
| 9              | 340.3                         | 29.4                  | 3.64 | 0.0024                | 92 →96(+88%) 90 →94(+11%)                        |
| 10             | 329.9                         | 30.3                  | 3.76 | 0.0333                | 92 →97(+69%) 93 →97(+24%)                        |
| 11             | 314.4                         | 31.8                  | 3.94 | 0.5356                | 90 →94(+75%) 92 →96(8%)<br>93 →96(6%) 93 →99(6%) |
| 12             | 309.1                         | 32.4                  | 4.01 | 0.0632                | 93 →99(+87%) 90 →94(+5%)                         |
| 13             | 300.8                         | 33.2                  | 4.12 | 0.0019                | 92 →99(+52%) 91 →97(+40%)                        |
| 14             | 299.2                         | 33.4                  | 4.14 | 0.0320                | 91 →97(+57%) 92 →99(37%)                         |
| 15             | 298.8                         | 33.5                  | 4.15 | 0.0016                | 91 →96(+96%)                                     |
| 16             | 292.3                         | 34.2                  | 4.24 | 0.0327                | 93 →100(+84%) 91 →99(9%)                         |
| 17             | 290.6                         | 34.4                  | 4.27 | 0.0163                | 93 →98(+88%)                                     |
| 18             | 279.4                         | 35.8                  | 4.44 | 0.0087                | 92 →98(+85%) 92 →101(+6%)                        |
| 19             | 278.4                         | 35.9                  | 4.45 | 0.0037                | 92 →100(+76%) 91 →99(17%)                        |
| 20             | 277.3                         | 36.1                  | 4.47 | 0.1507                | 90 →95(+88%)                                     |
| 21             | 271.9                         | 36.8                  | 4.56 | 0.0006                | 93 →101(+62%) 93 →103(+21%)                      |
| 22             | 265.8                         | 37.6                  | 4.66 | 0.0039                | 92 →101(+59%) 92 →103(+20%)<br>92 →98(6%)        |
| 23             | 260.7                         | 38.4                  | 4.76 | 0.0029                | 91 →100(+91%)                                    |
| 24             | 259.1                         | 38.6                  | 4.79 | 0.0670                | 89 →94(+85%) 91 →98(+6%)                         |
| 25             | 254.8                         | 39.2                  | 4.87 | 0.0030                | 93 →103(+52%) 93 →101(23%)<br>92 →103(10%)       |

|    |       |      |      |        |                                                                                    |
|----|-------|------|------|--------|------------------------------------------------------------------------------------|
| 26 | 248.3 | 40.3 | 4.99 | 0.1053 | 91 →98(+71%) 93 →104(+8%)<br>91 →99(+5%)                                           |
| 27 | 247.8 | 40.4 | 5.00 | 0.2539 | 89 →95(+91%)                                                                       |
| 28 | 241.4 | 41.4 | 5.14 | 0.0721 | 90 →97(+25%) 91 →99(+22%)<br>93 →104(11%) 93 →102(11%)<br>92 →106(+7%) 92 →104(6%) |
| 29 | 241.1 | 41.5 | 5.14 | 0.0001 | 92 →103(+57%) 92 →101(24%)<br>93 →103(+5%)                                         |
| 30 | 240.8 | 41.5 | 5.15 | 0.0219 | 90 →97(+33%) 93 →104(+22%)<br>91 →99(10%) 93 →102(10%)<br>92 →104(+6%) 88 →94(6%)  |

---

<sup>a</sup> # is the state. <sup>b</sup>E<sub>VER</sub> is the energy of the vertical transition. <sup>c</sup>*f* is the oscillator strength. <sup>d</sup>Assignment; MO# →MO# is the occupied and the virtual orbitals that define the transition. The value and phase (+/-) of the transition coefficient for each transition is given in parentheses.

**Table S3-C.** Calculated triplet excited states of for *mer,cis*-[Re(tpy- $\kappa^3$ N)(CO)<sub>2</sub>(NCCH<sub>3</sub>)<sup>+</sup> (3) in acetonitrile.

| # <sup>a</sup> | E <sub>VER</sub> <sup>b</sup> |                       |      | <i>f</i> <sup>c</sup> | Assignment; MO# →MO# <sup>d</sup>                   |
|----------------|-------------------------------|-----------------------|------|-----------------------|-----------------------------------------------------|
|                | nm                            | 1000 cm <sup>-1</sup> | eV   |                       |                                                     |
| 1              | 636.8                         | 15.7                  | 1.95 | 0.0000                | 93 →94(+96%)                                        |
| 2              | 572.9                         | 17.5                  | 2.16 | 0.0000                | 92 →94(+96%)                                        |
| 3              | 532.0                         | 18.8                  | 2.33 | 0.0000                | 93 →95(+79%) 92 →95(+9%)<br>90 →95(5%)              |
| 4              | 489.2                         | 20.4                  | 2.53 | 0.0000                | 91 →94(+88%)                                        |
| 5              | 473.1                         | 21.1                  | 2.62 | 0.0000                | 92 →95(+84%) 93 →95(10%)                            |
| 6              | 407.4                         | 24.5                  | 3.04 | 0.0000                | 91 →95(+86%) 90 →94(+12%)                           |
| 7              | 391.8                         | 25.5                  | 3.16 | 0.0000                | 90 →95(+58%) 89 →94(+8%)<br>93 →97(7%) 93 →95(+5%)  |
| 8              | 381.7                         | 26.2                  | 3.25 | 0.0000                | 90 →94(+66%) 91 →95(13%)<br>89 →95(+7%) 93 →96(+5%) |
| 9              | 379.1                         | 26.4                  | 3.27 | 0.0000                | 93 →97(+72%) 90 →95(+12%)<br>92 →97(+9%)            |
| 10             | 374.3                         | 26.7                  | 3.31 | 0.0000                | 93 →96(+79%) 90 →94(9%)<br>92 →96(+7%)              |

<sup>a</sup> # is the state. <sup>b</sup>E<sub>VER</sub> is the energy of the vertical transition. <sup>c</sup>*f* is the oscillator strength. <sup>d</sup>Assignment; MO# →MO# is the occupied and the virtual orbitals that define the transition. The value and phase (+/-) of the transition coefficient for each transition is given in parentheses.

**Table S3-D. The Fragment Analysis Based on Mullikan Populations for *mer,cis*-[Re(tpy-κ<sup>3</sup>N)(CO)<sub>2</sub>(NCCCH<sub>3</sub>)]<sup>+</sup> (3) in the Singlet Ground State.<sup>a</sup>**

| molecular orbital                                   | E, eV        | Re          |                |                |                |                             |                 |                 |                                          |                 |                    | tpy <sup>b</sup>   |                    | CO <sup>c</sup>    |              | NCCCH <sub>3</sub> <sup>d</sup> |      |
|-----------------------------------------------------|--------------|-------------|----------------|----------------|----------------|-----------------------------|-----------------|-----------------|------------------------------------------|-----------------|--------------------|--------------------|--------------------|--------------------|--------------|---------------------------------|------|
|                                                     |              | s           | P <sub>x</sub> | P <sub>y</sub> | P <sub>z</sub> | d <sub>x</sub> <sup>2</sup> | d <sub>xz</sub> | d <sub>yz</sub> | d <sub>x<sup>2</sup>-y<sup>2</sup></sub> | d <sub>xy</sub> | ∑ <sub>s,p,d</sub> | ∑ <sub>s,p,d</sub> | ∑ <sub>s,p,d</sub> | ∑ <sub>s,p,d</sub> |              |                                 |      |
| 89 (O)                                              | -10.70       | 0.00        | 0.00           | 0.04           | 0.01           | 0.07                        | 0.01            | 0.58            | 0.01                                     | 0.02            | 0.02               | 0.01               | 0.02               | 0.02               | 98.67        | 0.23                            | 0.35 |
| 90 (O)                                              | -9.94        | 0.00        | 0.01           | 0.00           | 0.00           | 0.00                        | 0.00            | 0.01            | 0.05                                     | 0.49            | 0.05               | 0.05               | 0.49               | 99.18              | 0.10         | 0.16                            |      |
| 91 (O)                                              | -8.71        | 0.02        | 0.02           | -0.01          | 1.08           | 7.54                        | 0.39            | 44.77           | 2.03                                     | 1.71            | 12.22              | 2.03               | 1.71               | 12.22              | 22.97        | 7.26                            |      |
| 92 (O)                                              | -8.28        | 0.00        | 4.62           | 0.11           | 0.07           | 2.66                        | 56.58           | 0.81            | 0.14                                     | 3.98            | 7.58               | 0.14               | 3.98               | 7.58               | 23.18        | 0.28                            |      |
| <b>93 (O)</b>                                       | <b>-8.21</b> | <b>0.00</b> | <b>0.04</b>    | <b>0.00</b>    | <b>0.00</b>    | <b>0.20</b>                 | <b>3.64</b>     | <b>1.52</b>     | <b>6.15</b>                              | <b>51.85</b>    | <b>15.75</b>       | <b>6.15</b>        | <b>51.85</b>       | <b>15.75</b>       | <b>13.03</b> | <b>7.85</b>                     |      |
| HOMO-LUMO gap: 2.745 eV (22138.5 cm <sup>-1</sup> ) |              |             |                |                |                |                             |                 |                 |                                          |                 |                    |                    |                    |                    |              |                                 |      |
| 94 (V)                                              | -5.46        | 0.00        | 0.01           | 1.30           | 0.23           | 0.53                        | 0.01            | 1.38            | 0.36                                     | 0.11            | 91.28              | 0.36               | 0.11               | 91.28              | 4.26         | 0.53                            |      |
| 95 (V)                                              | -5.18        | 0.00        | 0.06           | 0.00           | 0.00           | 0.00                        | 0.01            | 0.03            | 0.16                                     | 1.83            | 96.81              | 0.16               | 1.83               | 96.81              | 0.78         | 0.31                            |      |
| 96 (V)                                              | -4.15        | 0.00        | 0.01           | 0.63           | 0.01           | 0.00                        | 0.00            | 0.02            | 0.02                                     | 0.01            | 99.19              | 0.02               | 0.01               | 99.19              | 0.05         | 0.05                            |      |
| 97 (V)                                              | -4.10        | 0.00        | 0.10           | 0.00           | 0.00           | 0.00                        | 0.01            | 0.03            | 0.17                                     | 1.89            | 94.38              | 0.17               | 1.89               | 94.38              | 3.34         | 0.08                            |      |
| 98 (V)                                              | -3.42        | 0.01        | 0.01           | 0.29           | 0.17           | 0.04                        | 0.01            | 0.24            | 0.00                                     | 0.01            | 97.09              | 0.00               | 0.01               | 97.09              | 1.67         | 0.45                            |      |
| 99 (V)                                              | -3.21        | 0.00        | 8.76           | 0.08           | 0.00           | 0.03                        | 2.92            | 0.04            | 0.01                                     | 0.05            | 1.43               | 0.01               | 0.05               | 1.43               | 25.92        | 60.75                           |      |
| 100 (V)                                             | -3.21        | -0.04       | 0.03           | 1.51           | 8.19           | 2.48                        | 0.06            | 0.11            | 0.45                                     | 0.07            | 2.47               | 0.11               | 0.45               | 2.47               | 28.73        | 55.95                           |      |
| 101 (V)                                             | -2.44        | 0.00        | 0.04           | 0.00           | 0.00           | 0.00                        | 0.03            | 0.01            | 0.02                                     | 0.24            | 99.43              | 0.01               | 0.24               | 99.43              | 0.19         | 0.04                            |      |
| 102 (V)                                             | -2.21        | 0.07        | 0.69           | 28.65          | 0.09           | 0.52                        | 0.03            | 1.43            | 1.17                                     | 0.03            | 1.51               | 1.17               | 0.03               | 1.51               | 46.51        | 19.29                           |      |
| 103 (V)                                             | -2.07        | 7.29        | 0.26           | 0.17           | 22.11          | 15.02                       | 1.70            | 0.48            | 18.76                                    | 1.61            | 23.95              | 1.61               | 1.61               | 23.95              | 1.59         | 7.07                            |      |
| 105 (V)                                             | -1.65        | 9.80        | 0.32           | 41.51          | 10.21          | 0.52                        | 0.14            | 0.26            | 0.99                                     | 0.16            | 2.04               | 0.99               | 0.16               | 2.04               | 17.34        | 16.72                           |      |
| 107 (V)                                             | -1.34        | 7.31        | 1.58           | 9.94           | 40.95          | -0.04                       | 0.36            | 1.99            | 10.75                                    | 1.41            | 11.84              | 1.99               | 1.41               | 11.84              | 13.49        | 0.43                            |      |

<sup>a</sup>The orbital occupancy status is given in parenthesis (O = occupied, V = virtual). <sup>b</sup>Sum of the percent population for the three nitrogen, fifteen carbon, and eleven hydrogen atoms present in the terpyridine (2,2';6,6''-terpyridine (tpy); C<sub>15</sub>H<sub>11</sub>N<sub>3</sub>) ligand. <sup>c</sup>Sum of the percent population for the two carbon and two oxygen atoms present in the two carbonyl (CO) ligands. <sup>d</sup>Sum of the percent population for the one nitrogen (N) atom, two carbon, and three hydrogen atoms present in the acetonitrile (NCCCH<sub>3</sub>) ligand.

**Table S4-A.** Optimized geometry of *mer,cis*-Re(tpy- $\kappa^3$ N)(CO)<sub>2</sub>CN (4) in the singlet ground state with E(B3LYP) = - 1141.2383 au.

|    |             |             |             |
|----|-------------|-------------|-------------|
| Re | 0.23479359  | -0.29059109 | -0.07952503 |
| N  | -1.88618599 | -0.59177930 | 0.18308657  |
| C  | -2.78553327 | -0.85953394 | -0.78549199 |
| C  | -2.33260169 | -0.48906808 | 1.47685605  |
| C  | -4.14257039 | -1.02679986 | -0.53255324 |
| H  | -2.38432842 | -0.93617420 | -1.78792967 |
| C  | -3.68427150 | -0.64843708 | 1.78845402  |
| C  | -4.60342891 | -0.91891306 | 0.77840502  |
| H  | -4.81581073 | -1.23887284 | -1.35564847 |
| H  | -4.01740183 | -0.56177682 | 2.81557929  |
| H  | -5.65515861 | -1.04294990 | 1.01359817  |
| N  | -0.05452465 | -0.06974512 | 2.00067362  |
| C  | -1.30187888 | -0.20853464 | 2.49959087  |
| C  | 1.02350865  | 0.14128074  | 2.78646102  |
| C  | -1.51494215 | -0.09849502 | 3.87666658  |
| C  | 0.86149312  | 0.25883834  | 4.16995809  |
| C  | -0.42059203 | 0.14311129  | 4.70708892  |
| H  | -2.50598401 | -0.20323189 | 4.30025714  |
| H  | 1.70964700  | 0.43015536  | 4.82107280  |
| H  | -0.56617304 | 0.23236937  | 5.77830917  |
| C  | 0.51846855  | -0.66533617 | -1.92871397 |
| O  | 0.69627535  | -0.92128819 | -3.06353883 |
| C  | 0.00817710  | 1.58185008  | -0.51544068 |
| O  | -0.12231456 | 2.70470060  | -0.82345810 |
| C  | 2.30339677  | 0.20765134  | 2.04831188  |
| C  | 3.52901377  | 0.43639525  | 2.67687522  |
| N  | 2.22625469  | 0.02514617  | 0.69015361  |
| C  | 4.69937133  | 0.47909506  | 1.92412861  |
| H  | 3.56925692  | 0.58094791  | 3.74965213  |
| C  | 3.36759369  | 0.06361350  | -0.02718237 |
| C  | 4.61437757  | 0.28795937  | 0.54616446  |
| H  | 5.65472363  | 0.65708434  | 2.40628029  |
| H  | 3.25605867  | -0.09052671 | -1.09279605 |
| H  | 5.49534534  | 0.30893907  | -0.08560560 |
| C  | 0.49972503  | -2.38774965 | 0.31952690  |
| N  | 0.64302846  | -3.53026148 | 0.54269775  |

**Table S4-B.** Calculated singlet excited states of for *mer,cis*-Re(tpy-κ<sup>3</sup>N)(CO)<sub>2</sub>CN (4) in acetonitrile.

| # <sup>a</sup> | E <sub>VER</sub> <sup>b</sup> |                       |      | f <sup>c</sup> | Assignment; MO# →MO# <sup>d</sup>                  |
|----------------|-------------------------------|-----------------------|------|----------------|----------------------------------------------------|
|                | nm                            | 1000 cm <sup>-1</sup> | eV   |                |                                                    |
| 1              | 637.1                         | 15.7                  | 1.95 | 0.0262         | 89 →90(+98%)                                       |
| 2              | 578.0                         | 17.3                  | 2.14 | 0.0085         | 88 →90(+99%)                                       |
| 3              | 529.7                         | 18.9                  | 2.34 | 0.0075         | 89 →91(+89%) 87 →90(8%)                            |
| 4              | 494.0                         | 20.2                  | 2.51 | 0.0007         | 88 →91(+91%) 87 →90(8%)                            |
| 5              | 447.9                         | 22.3                  | 2.77 | 0.0829         | 87 →90(+78%) 89 →91(+9%)<br>89 →93(6%) 88 →91(+6%) |
| 6              | 428.0                         | 23.4                  | 2.90 | 0.0179         | 87 →91(+98%)                                       |
| 7              | 376.4                         | 26.6                  | 3.29 | 0.0646         | 89 →92(+92%)                                       |
| 8              | 368.8                         | 27.1                  | 3.36 | 0.0108         | 89 →93(+59%) 88 →93(38%)                           |
| 9              | 358.1                         | 27.9                  | 3.46 | 0.0223         | 88 →92(+94%)                                       |
| 10             | 348.6                         | 28.7                  | 3.56 | 0.0336         | 88 →93(+61%) 89 →93(+33%)                          |
| 11             | 320.2                         | 31.2                  | 3.87 | 0.0001         | 87 →93(+95%)                                       |
| 12             | 319.2                         | 31.3                  | 3.88 | 0.0051         | 87 →92(+98%)                                       |
| 13             | 311.1                         | 32.1                  | 3.98 | 0.4534         | 86 →90(+81%) 89 →95(+6%)                           |
| 14             | 307.5                         | 32.5                  | 4.03 | 0.0744         | 89 →95(+77%) 89 →94(+9%)<br>86 →90(6%)             |
| 15             | 304.6                         | 32.8                  | 4.07 | 0.0194         | 89 →94(+83%) 89 →95(12%)                           |
| 16             | 298.0                         | 33.6                  | 4.16 | 0.0309         | 88 →95(+89%)                                       |
| 17             | 290.4                         | 34.4                  | 4.27 | 0.0068         | 88 →94(+97%)                                       |
| 18             | 285.5                         | 35.0                  | 4.34 | 0.0156         | 89 →96(+78%) 87 →95(17%)                           |
| 19             | 278.3                         | 35.9                  | 4.46 | 0.1199         | 86 →91(+87%) 87 →94(+9%)                           |
| 20             | 271.5                         | 36.8                  | 4.57 | 0.0013         | 89 →98(+85%) 89 →101(8%)                           |
| 21             | 270.6                         | 36.9                  | 4.58 | 0.0016         | 88 →96(+67%) 87 →95(20%)                           |
| 22             | 264.1                         | 37.9                  | 4.69 | 0.0014         | 88 →98(+84%) 87 →96(+5%)                           |
| 23             | 262.0                         | 38.2                  | 4.73 | 0.0000         | 85 →90(+77%) 83 →90(14%)                           |
| 24             | 261.2                         | 38.3                  | 4.75 | 0.0760         | 87 →94(+75%) 83 →90(14%)                           |
| 25             | 258.0                         | 38.8                  | 4.81 | 0.0001         | 87 →96(+79%) 84 →90(+11%)                          |



|    |       |      |      |        |                                           |
|----|-------|------|------|--------|-------------------------------------------|
| 26 | 257.3 | 38.9 | 4.82 | 0.0160 | 84 →90(+84%) 87 →96(9%)                   |
| 27 | 252.8 | 39.6 | 4.90 | 0.1995 | 85 →91(+85%) 86 →92(+6%)                  |
| 28 | 251.9 | 39.7 | 4.92 | 0.1001 | 82 →90(+31%) 83 →90(30%)<br>89 →97(16%)   |
| 29 | 249.1 | 40.1 | 4.98 | 0.0347 | 82 →90(+60%) 89 →97(+22%)<br>83 →90(+13%) |
| 30 | 246.7 | 40.5 | 5.03 | 0.0774 | 89 →97(+54%) 83 →90(23%)<br>85 →90(10%)   |

---

<sup>a</sup> # is the state. <sup>b</sup>E<sub>VER</sub> is the energy of the vertical transition. <sup>c</sup>*f* is the oscillator strength. <sup>d</sup>Assignment; MO# →MO# is the occupied and the virtual orbitals that define the transition. The value and phase (+/-) of the transition coefficient for each transition is given in parentheses.

**Table S4-C.** Calculated triplet excited states of for *mer,cis*-Re(tpy-κ<sup>3</sup>N)(CO)<sub>2</sub>CN (4) in acetonitrile.

| # <sup>a</sup> | E <sub>VER</sub> <sup>b</sup> |                       |      | <i>f</i> <sup>c</sup> | Assignment; MO# →MO# <sup>d</sup>        |
|----------------|-------------------------------|-----------------------|------|-----------------------|------------------------------------------|
|                | nm                            | 1000 cm <sup>-1</sup> | eV   |                       |                                          |
| 1              | 685.2                         | 14.6                  | 1.81 | 0.0000                | 89 →90(+97%)                             |
| 2              | 596.5                         | 16.8                  | 2.08 | 0.0000                | 88 →90(+98%)                             |
| 3              | 587.2                         | 17.0                  | 2.11 | 0.0000                | 89 →91(+90%)                             |
| 4              | 524.7                         | 19.1                  | 2.36 | 0.0000                | 87 →90(+95%)                             |
| 5              | 505.8                         | 19.8                  | 2.45 | 0.0000                | 88 →91(+94)                              |
| 6              | 444.6                         | 22.5                  | 2.79 | 0.0000                | 87 →91(+97%)                             |
| 7              | 410.5                         | 24.4                  | 3.02 | 0.0000                | 89 →93(+74%) 86 →91(+7%)                 |
| 8              | 402.6                         | 24.8                  | 3.08 | 0.0000                | 89 →92(+88%)                             |
| 9              | 392.8                         | 25.5                  | 3.16 | 0.0000                | 86 →91(+65%) 89 →93(+14%)<br>85 →90(+7%) |
| 10             | 375.2                         | 26.7                  | 3.30 | 0.0000                | 86 →90(+79%) 85 →91(+7%)                 |

<sup>a</sup> # is the state. <sup>b</sup>E<sub>VER</sub> is the energy of the vertical transition. <sup>c</sup>*f* is the oscillator strength. <sup>d</sup>Assignment; MO# →MO# is the occupied and the virtual orbitals that define the transition. The value and phase (+/-) of the transition coefficient for each transition is given in parentheses.

Table S4-D. The Fragment Analysis Based on Mulliken Populations for *mer,cis*-Re(tpy-κ<sup>3</sup>N)(CO)<sub>2</sub>CN (4) in the Singlet Ground State.<sup>a</sup>

| molecular orbital                                   | E, eV | Re    |                |                |                |                            |                 |                                          |                 |                    |                    | tpy <sup>b</sup>   |                    | CO <sup>c</sup> |       | CN <sup>d</sup> |  |  |
|-----------------------------------------------------|-------|-------|----------------|----------------|----------------|----------------------------|-----------------|------------------------------------------|-----------------|--------------------|--------------------|--------------------|--------------------|-----------------|-------|-----------------|--|--|
|                                                     |       | s     | P <sub>x</sub> | P <sub>y</sub> | P <sub>z</sub> | d <sub>x<sup>2</sup></sub> | d <sub>yz</sub> | d <sub>x<sup>2</sup>-y<sup>2</sup></sub> | d <sub>xy</sub> | ∑ <sub>s,p,d</sub> | ∑ <sub>s,p,d</sub> | ∑ <sub>s,p,d</sub> | ∑ <sub>s,p,d</sub> |                 |       |                 |  |  |
| 82 (O)                                              | -7.94 | 0.00  | 0.00           | 0.05           | 0.01           | 0.08                       | 0.01            | 0.85                                     | 0.01            | 0.02               | 0.02               | 0.02               | 97.37              | 0.40            | 1.19  |                 |  |  |
| 83 (O)                                              | -7.21 | 0.00  | 0.09           | 0.00           | 0.00           | 0.00                       | 0.00            | 0.02                                     | 0.13            | 1.35               | 0.02               | 1.35               | 92.18              | 0.22            | 6.02  |                 |  |  |
| 84 (O)                                              | -7.06 | 0.97  | 0.05           | 2.16           | 0.06           | 2.57                       | 0.00            | 1.45                                     | 2.79            | 0.46               | 0.46               | 1.54               | 8.52               | 8.52            | 79.43 |                 |  |  |
| 85 (O)                                              | -6.98 | 0.52  | 0.00           | 0.50           | 0.86           | 0.01                       | 0.05            | 5.28                                     | 0.14            | 0.02               | 0.02               | 7.86               | 4.24               | 4.24            | 80.52 |                 |  |  |
| 86 (O)                                              | -6.94 | 0.00  | 1.30           | 0.03           | 0.02           | 0.00                       | 0.05            | 0.08                                     | 0.41            | 4.05               | 0.41               | 13.65              | 0.48               | 0.48            | 79.94 |                 |  |  |
| 87 (O)                                              | -5.43 | 0.02  | 0.03           | 0.03           | 1.05           | 4.12                       | 0.50            | 43.23                                    | 0.93            | 1.30               | 1.30               | 11.45              | 21.01              | 21.01           | 16.34 |                 |  |  |
| 88 (O)                                              | -5.17 | 0.00  | 4.70           | 0.11           | 0.07           | 2.50                       | 53.88           | 0.65                                     | 0.03            | 6.60               | 6.60               | 7.44               | 23.36              | 23.36           | 0.68  |                 |  |  |
| 89 (O)                                              | -4.92 | 0.00  | 0.00           | 0.00           | 0.00           | 0.37                       | 7.11            | 1.65                                     | 5.98            | 46.01              | 46.01              | 15.48              | 14.07              | 14.07           | 9.35  |                 |  |  |
| HOMO-LUMO gap: 2.384 eV (19230.4 cm <sup>-1</sup> ) |       |       |                |                |                |                            |                 |                                          |                 |                    |                    |                    |                    |                 |       |                 |  |  |
| 90 (V)                                              | -2.53 | 0.04  | 0.01           | 0.83           | 0.22           | 0.21                       | 0.04            | 2.92                                     | 0.08            | 0.09               | 0.09               | 89.44              | 4.70               | 4.70            | 1.43  |                 |  |  |
| 91 (V)                                              | -2.38 | 0.00  | 0.11           | 0.00           | 0.00           | 0.00                       | 0.00            | 0.04                                     | 0.24            | 2.55               | 0.04               | 95.71              | 1.24               | 1.24            | 0.10  |                 |  |  |
| 92 (V)                                              | -1.39 | 0.00  | 0.01           | 0.58           | 0.02           | 0.00                       | 0.00            | 0.04                                     | 0.00            | 0.00               | 0.00               | 99.29              | 0.03               | 0.03            | 0.03  |                 |  |  |
| 93 (V)                                              | -1.31 | 0.00  | 0.22           | 0.00           | 0.00           | 0.00                       | 0.00            | 0.05                                     | 0.27            | 2.85               | 0.05               | 92.65              | 3.93               | 3.93            | 0.02  |                 |  |  |
| 94 (V)                                              | -0.66 | 0.00  | 0.00           | 0.27           | 0.03           | 0.01                       | 0.01            | 0.25                                     | 0.00            | 0.01               | 0.01               | 98.20              | 1.19               | 1.19            | 0.03  |                 |  |  |
| 95 (V)                                              | 0.33  | 0.00  | 0.07           | 0.00           | 0.00           | 0.00                       | 0.03            | 0.00                                     | 0.02            | 0.15               | 0.15               | 99.28              | 0.37               | 0.37            | 0.07  |                 |  |  |
| 96 (V)                                              | 0.37  | -0.41 | 0.70           | 2.51           | 24.29          | 10.62                      | 0.61            | 0.90                                     | 3.00            | 0.18               | 0.18               | 8.62               | 43.47              | 43.47           | 5.49  |                 |  |  |
| 97 (V)                                              | 0.57  | 0.00  | 28.99          | 0.65           | 0.43           | 0.39                       | 8.60            | 0.02                                     | 0.14            | 5.90               | 0.02               | 5.53               | 42.26              | 42.26           | 7.10  |                 |  |  |
| 98 (V)                                              | 0.90  | 13.76 | 0.02           | 4.53           | 4.26           | 5.75                       | 0.97            | 0.15                                     | 15.57           | 1.41               | 1.41               | 24.31              | 27.28              | 27.28           | 1.97  |                 |  |  |
| 101 (V)                                             | 1.55  | 0.00  | 51.60          | 1.16           | 0.79           | 0.22                       | 4.80            | 0.10                                     | 0.05            | 0.02               | 0.02               | 19.44              | 21.62              | 21.62           | 0.19  |                 |  |  |

<sup>a</sup>The orbital occupancy status is given in parenthesis (O = occupied, V = virtual). <sup>b</sup>Sum of the percent population for the three nitrogen, fifteen carbon, and eleven hydrogen atoms present in the terpyridine (2,2';6,2''-terpyridine (tpy); C<sub>15</sub>H<sub>11</sub>N<sub>3</sub>) ligand. <sup>c</sup>Sum of the percent population for the two carbon and two oxygen atoms present in the two carbonyl (CO) ligands. <sup>d</sup>Sum of the percent population for the one carbon and one nitrogen atom present in the cyano (CN) ligand.

**Table S5-A.** Optimized geometry of *mer,cis*-[Re(tpy- $\kappa^3$ N)(CO)<sub>2</sub>(NC<sub>5</sub>H<sub>5</sub>)]<sup>+</sup> (5) in the singlet ground state with E(B3LYP) = - 1296.5071 au.

|    |             |             |             |
|----|-------------|-------------|-------------|
| Re | 0.21559986  | -0.27124996 | -0.05394064 |
| N  | -1.91286043 | -0.52691381 | 0.18433331  |
| C  | -2.80329692 | -0.80248078 | -0.79037739 |
| C  | -2.38145108 | -0.33314739 | 1.46170225  |
| C  | -4.17295145 | -0.88508623 | -0.56051631 |
| H  | -2.38508831 | -0.95274573 | -1.78073233 |
| C  | -3.74472053 | -0.40292587 | 1.74854335  |
| C  | -4.65476891 | -0.67854151 | 0.73020315  |
| H  | -4.84100905 | -1.10815713 | -1.38866155 |
| H  | -4.09592397 | -0.24205799 | 2.76385768  |
| H  | -5.71950133 | -0.73217920 | 0.94606520  |
| N  | -0.09287840 | -0.01476473 | 2.01464066  |
| C  | -1.35434126 | -0.06976088 | 2.49537362  |
| C  | 0.98227675  | 0.17144689  | 2.81056493  |
| C  | -1.58328398 | 0.09059543  | 3.86446037  |
| C  | 0.80556497  | 0.33368803  | 4.18709719  |
| C  | -0.48936867 | 0.29647168  | 4.70534218  |
| H  | -2.58761272 | 0.05001699  | 4.27538990  |
| H  | 1.65304011  | 0.48474589  | 4.84904469  |
| H  | -0.64655661 | 0.42285225  | 5.77417793  |
| C  | 0.49446892  | -0.66030822 | -1.90279843 |
| O  | 0.66212607  | -0.92162093 | -3.03616555 |
| C  | 0.01612836  | 1.56296187  | -0.50219755 |
| O  | -0.09864620 | 2.69113256  | -0.79915570 |
| C  | 2.27355508  | 0.18890421  | 2.08694926  |
| C  | 3.49550410  | 0.38894302  | 2.72911065  |
| N  | 2.20714553  | 0.01124645  | 0.72679395  |
| C  | 4.67459064  | 0.41611173  | 1.98734558  |
| H  | 3.52778880  | 0.52605062  | 3.80620270  |
| C  | 3.35513094  | 0.04470994  | 0.01969027  |
| C  | 4.60048291  | 0.24466081  | 0.60723917  |
| H  | 5.63055499  | 0.57229305  | 2.48224096  |
| H  | 3.25257233  | -0.08907883 | -1.05295234 |
| H  | 5.48967240  | 0.26212235  | -0.01793631 |
| C  | 1.59341514  | -3.13931562 | -0.11141953 |
| C  | -0.31628079 | -3.21261739 | 1.18448169  |
| C  | 1.84851751  | -4.48752393 | 0.11132059  |
| H  | 2.25835732  | -2.54329164 | -0.72958521 |
| C  | -0.13159502 | -4.56432702 | 1.45687018  |
| H  | -1.17094569 | -2.68434718 | 1.59558049  |
| C  | 0.97120708  | -5.21945091 | 0.91133327  |
| H  | 2.72439524  | -4.94772247 | -0.33988724 |
| H  | -0.84816694 | -5.08533175 | 2.08739114  |
| H  | 1.14339465  | -6.27660098 | 1.10456920  |

N            0.52624634 -2.49627152 0.41189992

**Table S5-B.** Calculated singlet excited states of for *mer,cis*-[Re(tpy- $\kappa^3$ N)(CO)<sub>2</sub>(NC<sub>3</sub>H<sub>5</sub>)<sup>+</sup> (5) in acetonitrile.

| # <sup>a</sup> | E <sub>VER</sub> <sup>b</sup> |                       |      | <i>f</i> <sup>c</sup> | Assignment; MO# →MO# <sup>d</sup>                          |
|----------------|-------------------------------|-----------------------|------|-----------------------|------------------------------------------------------------|
|                | nm                            | 1000 cm <sup>-1</sup> | eV   |                       |                                                            |
| 1              | 623.1                         | 16.0                  | 1.99 | 0.0217                | 103 →104(+98%)                                             |
| 2              | 571.4                         | 17.5                  | 2.17 | 0.0130                | 102 →104(+98%)                                             |
| 3              | 501.5                         | 19.9                  | 2.47 | 0.0054                | 103 →105(+89%) 101 →104(8%)                                |
| 4              | 471.6                         | 21.2                  | 2.63 | 0.0004                | 102 →105(+86%) 101 →<br>104(+13%)                          |
| 5              | 435.3                         | 23.0                  | 2.85 | 0.0831                | 101 →104(+74%) 102 →105(10%)<br>103 →105(+9%)              |
| 6              | 402.8                         | 24.8                  | 3.08 | 0.0137                | 101 →105(+98%)                                             |
| 7              | 375.9                         | 26.6                  | 3.30 | 0.0297                | 103 →106(+88%) 102 →106(+8%)                               |
| 8              | 362.0                         | 27.6                  | 3.42 | 0.0317                | 103 →107(+88%) 100 →104(+6%)                               |
| 9              | 359.2                         | 27.8                  | 3.45 | 0.0112                | 102 →106(+43%) 103 →108(43%)<br>102 →108(10%)              |
| 10             | 352.8                         | 28.3                  | 3.51 | 0.0164                | 102 →106(+46%) 103 →<br>108(+23%) 102 →108(+21%)           |
| 11             | 346.4                         | 28.9                  | 3.58 | 0.0059                | 102 →107(+88%) 100 →104(7%)                                |
| 12             | 337.0                         | 29.7                  | 3.68 | 0.0254                | 102 →108(+62%) 103 →108(24%)                               |
| 13             | 316.7                         | 31.6                  | 3.91 | 0.5232                | 100 →104(+81%) 103 →107(7%)                                |
| 14             | 313.9                         | 31.9                  | 3.95 | 0.0030                | 103 →109(+84%) 103 →111(5%)                                |
| 15             | 312.9                         | 32.0                  | 3.96 | 0.0886                | 101 →106(+79%) 101 →108(8%)                                |
| 16             | 305.2                         | 32.8                  | 4.06 | 0.0228                | 101 →107(+85%) 101 →108(10%)                               |
| 17             | 302.9                         | 33.0                  | 4.09 | 0.0357                | 101 →108(+79%) 101 →<br>107(+11%) 101 →106(+7%)            |
| 18             | 299.4                         | 35.8                  | 4.14 | 0.0040                | 102 →109(+77%) 102 →111(12%)<br>103 →109(6%)               |
| 19             | 292.8                         | 34.2                  | 4.23 | 0.0083                | 103 →110(+83%) 103 →111(9%)                                |
| 20             | 286.7                         | 34.9                  | 4.33 | 0.0204                | 103 →111(+74%) 103 →<br>110(+13%)                          |
| 21             | 282.6                         | 35.4                  | 4.39 | 0.0020                | 99 →104(+99%)                                              |
| 22             | 281.2                         | 35.6                  | 4.41 | 0.0053                | 102 →111(+45%) 102 →110(35%)<br>102 →109(+8%) 103 →111(6%) |
| 23             | 279.1                         | 35.8                  | 4.44 | 0.0053                | 102 →110(+53%) 102 →<br>111(+28%) 100 →105(6%)             |
| 24             | 278.3                         | 35.9                  | 4.46 | 0.1274                | 100 →105(+81%)                                             |

|    |       |      |      |        |                                                                                  |
|----|-------|------|------|--------|----------------------------------------------------------------------------------|
| 25 | 274.3 | 36.5 | 4.52 | 0.0014 | 103 →113(+53%) 103 →<br>112(+30%)                                                |
| 26 | 269.3 | 37.1 | 4.60 | 0.0025 | 101 →109(+63%) 103 →114(11%)<br>103 →112(+9%) 101 →111(5%)                       |
| 27 | 268.2 | 37.3 | 4.62 | 0.0058 | 102 →113(+54%) 102 →<br>112(+29%)                                                |
| 28 | 263.0 | 38.0 | 4.71 | 0.0089 | 103 →114(+28%) 101 →<br>109(+26%) 103 →112(19%) 101 →<br>111(+11%) 103 →113(+8%) |
| 29 | 260.6 | 38.4 | 4.76 | 0.0568 | 98 →104(+78%) 101 →110(+6%)                                                      |
| 30 | 259.5 | 38.5 | 4.78 | 0.0036 | 99 →105(+95%)                                                                    |

---

<sup>a</sup> # is the state. <sup>b</sup>E<sub>VER</sub> is the energy of the vertical transition. <sup>c</sup>*f* is the oscillator strength. <sup>d</sup>Assignment; MO# →MO# is the occupied and the virtual orbitals that define the transition. The value and phase (+/-) of the transition coefficient for each transition is given in parentheses.

**Table S5-C.** Calculated triplet excited states of for *mer,cis*-[Re(tpy- $\kappa^3$ N)(CO)<sub>2</sub>(NC<sub>3</sub>H<sub>5</sub>)]<sup>+</sup> (5) in acetonitrile.

| # <sup>a</sup> | E <sub>VER</sub> <sup>b</sup> |                       |      | <i>f</i> <sup>c</sup> | Assignment; MO# →MO# <sup>d</sup>                                                 |
|----------------|-------------------------------|-----------------------|------|-----------------------|-----------------------------------------------------------------------------------|
|                | nm                            | 1000 cm <sup>-1</sup> | eV   |                       |                                                                                   |
| 1              | 669.9                         | 14.9                  | 1.85 | 0.0000                | 103 →104(+97%)                                                                    |
| 2              | 594.9                         | 16.8                  | 2.08 | 0.0000                | 102 →104(+97%)                                                                    |
| 3              | 550.0                         | 18.2                  | 2.25 | 0.0000                | 103 →105(+84%) 102 →105(6%)                                                       |
| 4              | 508.6                         | 19.7                  | 2.44 | 0.0000                | 101 →104(+93%)                                                                    |
| 5              | 483.6                         | 20.7                  | 2.56 | 0.0000                | 102 →105(+89%) 103 →105(+7%)                                                      |
| 6              | 418.5                         | 23.9                  | 2.96 | 0.0000                | 101 →105(+91%) 100 →104(+6%)                                                      |
| 7              | 399.4                         | 25.0                  | 3.10 | 0.0000                | 103 →106(+50%) 103 →108(18%)<br>100 →105(+11%)                                    |
| 8              | 393.0                         | 25.4                  | 3.15 | 0.0000                | 100 →105(+45%) 103 →106(29%)<br>98 →104(+6%)                                      |
| 9              | 385.4                         | 25.9                  | 3.22 | 0.0000                | 103 →107(+36%) 100 →<br>104(+35%)<br>98 →105(+5%)<br>103 →108(+36%) 103 →107(23%) |
| 10             | 384.0                         | 26.0                  | 3.23 | 0.0000                | 100 →104(+13%) 103 →<br>106(+10%)<br>100 →105(+8%)                                |

<sup>a</sup> # is the state. <sup>b</sup>E<sub>VER</sub> is the energy of the vertical transition. <sup>c</sup>*f* is the oscillator strength. <sup>d</sup>Assignment; MO# →MO# is the occupied and the virtual orbitals that define the transition. The value and phase (+/-) of the transition coefficient for each transition is given in parentheses.



**Table S5-D. The Fragment Analysis Based on Mullikan Populations for *mer,cis*-[Re(tpy-κ<sup>3</sup>N)(CO)<sub>2</sub>(NC<sub>5</sub>H<sub>5</sub>)<sup>+</sup> (S) in the Singlet Ground State.<sup>a</sup>**

| molecular orbital                                   | <i>E<sub>f</sub></i> , eV | Re          |                |                |                |                                          |                 |                 |                                          |                 |                    | tpy <sup>b</sup>   |                    | CO <sup>c</sup>    |              | NC <sub>5</sub> H <sub>5</sub> <sup>d</sup> |              |
|-----------------------------------------------------|---------------------------|-------------|----------------|----------------|----------------|------------------------------------------|-----------------|-----------------|------------------------------------------|-----------------|--------------------|--------------------|--------------------|--------------------|--------------|---------------------------------------------|--------------|
|                                                     |                           | s           | P <sub>x</sub> | P <sub>y</sub> | P <sub>z</sub> | d <sub>x<sup>2</sup>-y<sup>2</sup></sub> | d <sub>xz</sub> | d <sub>yz</sub> | d <sub>x<sup>2</sup>-y<sup>2</sup></sub> | d <sub>xy</sub> | ∑ <sub>s,p,d</sub> | ∑ <sub>s,p,d</sub> | ∑ <sub>s,p,d</sub> | ∑ <sub>s,p,d</sub> |              |                                             |              |
| 98 (O)                                              | -10.67                    | 0.00        | 0.00           | 0.03           | 0.00           | 0.03                                     | 0.00            | 0.029           | 0.00                                     | 0.05            | 0.05               | 0.05               | 0.04               | 0.04               | 0.29         | 0.29                                        | 0.29         |
| 99 (O)                                              | -10.50                    | 0.00        | -0.01          | 0.00           | 0.00           | 0.08                                     | 0.11            | 0.01            | 0.04                                     | 0.00            | 0.00               | 0.00               | 1.69               | 1.04               | 97.06        | 97.06                                       | 97.06        |
| 100 (O)                                             | -9.99                     | 0.00        | -0.02          | 1.20           | -0.01          | 0.47                                     | 0.00            | 0.73            | 0.02                                     | 0.35            | 0.35               | 0.35               | 98.98              | 0.04               | 0.58         | 0.58                                        | 0.58         |
| 101 (O)                                             | -8.56                     | 0.01        | 0.00           | 0.14           | 0.57           | 8.29                                     | 0.19            | 41.65           | 1.79                                     | 3.75            | 3.75               | 3.75               | 18.50              | 20.42              | 4.69         | 4.69                                        | 4.69         |
| 102 (O)                                             | -8.36                     | 0.05        | 2.81           | 0.06           | 0.26           | 5.67                                     | 57.09           | 0.89            | 0.74                                     | 2.21            | 2.21               | 2.21               | 9.32               | 20.21              | 0.68         | 0.68                                        | 0.68         |
| <b>103 (O)</b>                                      | <b>-7.86</b>              | <b>0.03</b> | <b>-0.03</b>   | <b>-0.03</b>   | <b>-0.01</b>   | <b>0.15</b>                              | <b>1.45</b>     | <b>2.50</b>     | <b>4.31</b>                              | <b>45.18</b>    | <b>45.18</b>       | <b>45.18</b>       | <b>26.39</b>       | <b>9.75</b>        | <b>10.30</b> | <b>10.30</b>                                | <b>10.30</b> |
| HOMO-LUMO gap: 2.578 eV (20793.1 cm <sup>-1</sup> ) |                           |             |                |                |                |                                          |                 |                 |                                          |                 |                    |                    |                    |                    |              |                                             |              |
| 104 (V)                                             | -5.28                     | 0.01        | 0.02           | 1.57           | 0.58           | 0.58                                     | 0.00            | 1.48            | 0.16                                     | 0.11            | 0.11               | 0.11               | 83.91              | 10.31              | 1.28         | 1.28                                        | 1.28         |
| 105 (V)                                             | -5.03                     | 0.00        | 0.06           | 0.01           | 0.01           | 0.00                                     | 0.01            | 0.03            | 0.11                                     | 1.92            | 1.92               | 1.92               | 93.98              | 0.63               | 3.23         | 3.23                                        | 3.23         |
| 106 (V)                                             | -4.38                     | 0.00        | 1.16           | 0.01           | 0.98           | -0.02                                    | 0.38            | 0.10            | 0.16                                     | 0.71            | 0.71               | 0.71               | 7.12               | 12.10              | 77.30        | 77.30                                       | 77.30        |
| 107 (V)                                             | -4.18                     | 0.00        | 0.01           | 0.82           | 0.09           | 0.06                                     | 0.01            | 0.44            | 0.01                                     | 0.03            | 0.03               | 0.03               | 96.56              | 1.00               | 0.96         | 0.96                                        | 0.96         |
| 108 (V)                                             | -4.04                     | -0.02       | 1.15           | 0.06           | 0.03           | 0.09                                     | 0.09            | 0.04            | 0.23                                     | 1.59            | 1.59               | 1.59               | 64.44              | 16.36              | 1.59         | 1.59                                        | 1.59         |
| 109 (V)                                             | -3.83                     | 0.11        | 0.21           | 0.25           | 0.02           | 0.19                                     | 0.22            | 1.00            | 0.09                                     | 0.22            | 0.22               | 0.22               | 22.87              | 14.56              | 60.26        | 60.26                                       | 60.26        |
| 110 (V)                                             | -3.45                     | -0.01       | 0.05           | 0.23           | 0.38           | 0.14                                     | 0.00            | 0.11            | 0.05                                     | 0.01            | 0.01               | 0.01               | 84.53              | 3.37               | 11.14        | 11.14                                       | 11.14        |
| 111 (V)                                             | -3.24                     | 0.04        | 4.97           | 0.16           | 0.04           | 0.32                                     | 17.91           | 0.11            | 0.27                                     | 0.09            | 0.09               | 0.09               | 7.91               | 65.09              | 3.09         | 3.09                                        | 3.09         |
| 112 (V)                                             | -3.13                     | 0.49        | 0.34           | 2.69           | 3.10           | 0.39                                     | 0.04            | 0.64            | 0.00                                     | 0.23            | 0.23               | 0.23               | -0.42              | 83.51              | 8.99         | 8.99                                        | 8.99         |
| 113 (V)                                             | -2.82                     | 0.12        | 5.16           | 2.30           | 2.09           | 0.55                                     | 0.06            | 6.84            | 0.92                                     | 12.38           | 12.38              | 12.38              | 13.00              | 51.68              | 4.90         | 4.90                                        | 4.90         |
| 114 (V)                                             | -2.61                     | 0.03        | 1.13           | 0.11           | 3.48           | 1.12                                     | 0.07            | 5.41            | 0.25                                     | 1.44            | 1.44               | 1.44               | 58.59              | 24.87              | 3.50         | 3.50                                        | 3.50         |

<sup>a</sup>The orbital occupancy status is given in parenthesis (O = occupied, V = virtual). <sup>b</sup>Sum of the percent population for the three nitrogen, fifteen carbon, and eleven hydrogen atoms present in the terpyridine (2,2';6',2''-terpyridine (tpy); C<sub>15</sub>H<sub>11</sub>N<sub>3</sub>) ligand. <sup>c</sup>Sum of the percent population for the two carbon and two oxygen atoms present in the two carbonyl (CO) ligands. <sup>d</sup>Sum of the percent population for the one nitrogen (N) atom, five carbon, and five hydrogen atoms present in the pyridine (NC<sub>5</sub>H<sub>5</sub>) ligand.

**Table S6-A.** Optimized geometry of *mer,cis*-[Re(tpy- $\kappa^3$ N)(CO)<sub>2</sub>(PMe)<sub>3</sub>]<sup>+</sup> (6) in the singlet ground state with E(B3LYP) = - 1509.3025 au.

|    |             |             |             |
|----|-------------|-------------|-------------|
| Re | 2.50953762  | 2.88071548  | -3.04804345 |
| N  | 2.61699589  | 4.97919603  | -3.07361029 |
| C  | 2.46127401  | 5.65622744  | -1.91071219 |
| C  | 2.83847657  | 5.60818159  | -4.25272466 |
| C  | 2.53079078  | 7.05233551  | -1.90465485 |
| C  | 2.22025302  | 4.78799071  | -0.73930099 |
| C  | 2.91513644  | 7.00333148  | -4.29256070 |
| C  | 2.97245198  | 4.69230420  | -5.40493572 |
| C  | 2.75875577  | 7.72168557  | -3.10708326 |
| H  | 2.40830319  | 7.61368923  | -0.98612344 |
| C  | 1.99832905  | 5.28823554  | 0.54568413  |
| N  | 2.21045563  | 3.43572494  | -0.98673846 |
| H  | 3.09050577  | 7.52670810  | -5.22483946 |
| C  | 3.16937005  | 5.13941174  | -6.71338807 |
| N  | 2.87696651  | 3.35094619  | -5.11940902 |
| H  | 2.81288554  | 8.80535982  | -3.12061312 |
| C  | 1.75318338  | 4.41482575  | 1.60157157  |
| H  | 2.00863217  | 6.35804692  | 0.71927741  |
| C  | 1.96708665  | 2.59954155  | 0.04590286  |
| C  | 3.26415839  | 4.22294576  | -7.75691872 |
| H  | 3.24023557  | 6.20149639  | -6.91756508 |
| C  | 2.96646889  | 2.47255696  | -6.14179721 |
| C  | 1.73454097  | 3.04504746  | 1.34231440  |
| H  | 1.57484130  | 4.79735049  | 2.60117957  |
| H  | 1.95705433  | 1.54514860  | -0.20027939 |
| C  | 3.15685608  | 2.86446505  | -7.46218017 |
| H  | 3.41203538  | 4.56410327  | -8.77627720 |
| H  | 2.87338052  | 1.42872527  | -5.86926664 |
| H  | 1.54012952  | 2.32196859  | 2.12706969  |
| H  | 3.21543123  | 2.10937432  | -8.23864031 |
| C  | 2.54328888  | 0.96072208  | -3.00277158 |
| O  | 2.61545571  | -0.20572216 | -2.96700989 |
| C  | 0.59373782  | 2.79778140  | -3.35547080 |
| O  | -0.54779696 | 2.70339226  | -3.53796329 |
| P  | 4.99719579  | 2.66511249  | -2.64493464 |
| C  | 6.00223422  | 4.21537192  | -2.54374642 |
| H  | 5.91333218  | 4.78100393  | -3.47658300 |
| H  | 5.64005071  | 4.84467384  | -1.72470985 |
| H  | 7.05931721  | 3.98811716  | -2.37061516 |
| C  | 5.89006685  | 1.68106156  | -3.92593843 |
| H  | 5.45251733  | 0.67974628  | -3.98365917 |
| H  | 5.78859939  | 2.15837208  | -4.90516335 |
| H  | 6.95417012  | 1.59094777  | -3.68370536 |
| C  | 5.44306670  | 1.78478873  | -1.08512043 |

|   |            |            |             |
|---|------------|------------|-------------|
| H | 6.52909627 | 1.68954192 | -0.98228781 |
| H | 5.05148333 | 2.32904766 | -0.22059060 |
| H | 4.99808220 | 0.78508499 | -1.09364045 |

**Table S6-B.** Calculated singlet excited states of for *mer,cis*-[Re(tpy- $\kappa^3N$ )(CO)<sub>2</sub>(PMe<sub>3</sub>)<sup>+</sup> (6) in acetonitrile.

| # <sup>a</sup> | E <sub>VER</sub> <sup>b</sup> |                       |      | <i>f</i> <sup>c</sup> | Assignment; MO# →MO# <sup>d</sup>            |
|----------------|-------------------------------|-----------------------|------|-----------------------|----------------------------------------------|
|                | nm                            | 1000 cm <sup>-1</sup> | eV   |                       |                                              |
| 1              | 596.0                         | 16.8                  | 2.08 | 0.0153                | 103 →104(+98%)                               |
| 2              | 557.2                         | 17.9                  | 2.23 | 0.0138                | 102 →104(+98%)                               |
| 3              | 494.1                         | 20.2                  | 2.51 | 0.0046                | 103 →105(+89%) 101 →104(+5%)                 |
| 4              | 470.5                         | 21.3                  | 2.64 | 0.0021                | 102 →105(+85%) 101 →104(13%)                 |
| 5              | 432.4                         | 23.6                  | 2.93 | 0.0922                | 101 →104(+76%) 102 →105(+9%)<br>103 →105(8%) |
| 6              | 403.5                         | 24.8                  | 3.07 | 0.0204                | 101 →105(+98%)                               |
| 7              | 359.9                         | 27.8                  | 3.44 | 0.0277                | 103 →106(+89%) 102 →106(+6%)                 |
| 8              | 356.2                         | 28.1                  | 3.48 | 0.0047                | 103 →107(+63%) 102 →<br>107(+35%)            |
| 9              | 346.8                         | 28.8                  | 3.58 | 0.0192                | 102 →106(+88%) 100 →104(8%)                  |
| 10             | 333.6                         | 30.0                  | 3.72 | 0.0388                | 102 →107(+61%) 103 →107(31%)                 |
| 11             | 312.8                         | 32.0                  | 3.96 | 0.4840                | 100 →104(+79%) 101 →107(+7%)<br>103 →106(5%) |
| 12             | 305.7                         | 32.7                  | 4.06 | 0.0093                | 101 →106(+91%)                               |
| 13             | 305.5                         | 32.7                  | 4.06 | 0.0192                | 101 →107(+83%) 101 →106(+5%)                 |
| 14             | 301.2                         | 33.2                  | 4.12 | 0.0333                | 102 →109(+90%)                               |
| 15             | 298.1                         | 33.5                  | 4.16 | 0.0050                | 103 →109(+90%)                               |
| 16             | 291.7                         | 34.3                  | 4.25 | 0.0280                | 103 →108(+88%)                               |
| 17             | 284.6                         | 35.1                  | 4.36 | 0.0209                | 103 →110(+86%) 101 →109(+8%)                 |
| 18             | 283.1                         | 35.3                  | 4.38 | 0.0088                | 102 →108(+92%)                               |
| 19             | 278.0                         | 36.0                  | 4.46 | 0.1370                | 100 →105(+89%)                               |
| 20             | 275.3                         | 36.3                  | 4.50 | 0.0295                | 99 →104(+95%)                                |
| 21             | 272.8                         | 36.7                  | 4.54 | 0.0002                | 103 →111(+85%)                               |
| 22             | 271.9                         | 36.8                  | 4.56 | 0.0016                | 102 →110(+64%) 101 →109(24%)                 |
| 23             | 268.2                         | 37.3                  | 4.62 | 0.0065                | 102 →111(+85%)                               |
| 24             | 258.6                         | 38.7                  | 4.79 | 0.0081                | 99 →105(+97%)                                |
| 25             | 257.3                         | 38.9                  | 4.82 | 0.0212                | 98 →104(+73%) 101 →108(+20%)                 |

|    |       |      |      |        |                                                                              |
|----|-------|------|------|--------|------------------------------------------------------------------------------|
| 26 | 256.0 | 39.1 | 4.84 | 0.0012 | 101 →110(+93%)                                                               |
| 27 | 250.2 | 40.0 | 4.96 | 0.2169 | 101 →108(+68%) 98 →104(15%)                                                  |
| 28 | 247.1 | 40.5 | 5.02 | 0.2476 | 98 →105(+94%)<br>100 →107(+29%) 102 →<br>113(+20%)                           |
| 29 | 241.5 | 41.4 | 5.13 | 0.0156 | 103 →112(+18%) 101 →<br>109(+12%)<br>103 →113(6%)                            |
| 30 | 240.4 | 41.6 | 5.16 | 0.0359 | 102 →113(+24%) 100 →107(23%)<br>103 →112(14%) 101 →109(+13%)<br>103 →113(8%) |

---

<sup>a</sup> # is the state. <sup>b</sup>E<sub>VER</sub> is the energy of the vertical transition. <sup>c</sup>*f* is the oscillator strength. <sup>d</sup>Assignment; MO# →MO# is the occupied and the virtual orbitals that define the transition. The value and phase (+/-) of the transition coefficient for each transition is given in parentheses.

**Table S6-C.** Calculated triplet excited states of for *mer,cis*-[Re(tpy- $\kappa^3$ N)(CO)<sub>2</sub>(PMe<sub>3</sub>)<sup>+</sup> (6) in acetonitrile.

| # <sup>a</sup> | E <sub>VER</sub> <sup>b</sup> |                       |      | <i>f</i> <sup>c</sup> | Assignment; MO# →MO# <sup>d</sup>                                          |
|----------------|-------------------------------|-----------------------|------|-----------------------|----------------------------------------------------------------------------|
|                | nm                            | 1000 cm <sup>-1</sup> | eV   |                       |                                                                            |
| 1              | 636.6                         | 15.7                  | 1.95 | 0.0000                | 103 →104(+92%) 102 →104(6%)                                                |
| 2              | 579.5                         | 17.3                  | 2.14 | 0.0000                | 102 →104(+93%) 103 →104(+6%)                                               |
| 3              | 544.9                         | 18.4                  | 2.28 | 0.0000                | 103 →105(+76%) 102 →105(13%)                                               |
| 4              | 504.9                         | 19.8                  | 2.46 | 0.0000                | 101 →104(+92%)                                                             |
| 5              | 486.1                         | 20.6                  | 2.55 | 0.0000                | 102 →105(+81%) 103 →<br>105(+16%)                                          |
| 6              | 422.2                         | 23.7                  | 2.94 | 0.0000                | 101 →105(+94%)                                                             |
| 7              | 394.2                         | 25.4                  | 3.15 | 0.0000                | 100 →105(+37%) 103 →107(26%)<br>102 →107(+6%) 103 →105(+6%)<br>98 →104(6%) |
| 8              | 384.4                         | 26.0                  | 3.23 | 0.0000                | 103 →106(+63%) 102 →106(11%)<br>100 →104(+9%)                              |
| 9              | 383.3                         | 26.1                  | 3.24 | 0.0000                | 103 →107(+49%) 100 →<br>105(+34%)<br>102 →107(8%)                          |
| 10             | 375.6                         | 26.6                  | 3.30 | 0.0000                | 100 →104(+72%) 103 →106(15%)<br>98 →105(5%)                                |

<sup>a</sup> # is the state. <sup>b</sup>E<sub>VER</sub> is the energy of the vertical transition. <sup>c</sup>*f* is the oscillator strength. <sup>d</sup>Assignment; MO# →MO# is the occupied and the virtual orbitals that define the transition. The value and phase (+/-) of the transition coefficient for each transition is given in parentheses.

**Table S6-D. The Fragment Analysis Based on Mullikan Populations for *mer,cis*-[Re(tpy-κ<sup>3</sup>N)(CO)<sub>2</sub>(PMe<sub>3</sub>)]<sup>+</sup> (6) in the Singlet Ground State.<sup>a</sup>**

| molecular orbital                                        | E, eV        | Re          |                |                |                |                                          |                 |                 |                                          |                 |                    | tpy <sup>b</sup> | CO <sup>c</sup> | PMe <sub>3</sub> <sup>d</sup> |
|----------------------------------------------------------|--------------|-------------|----------------|----------------|----------------|------------------------------------------|-----------------|-----------------|------------------------------------------|-----------------|--------------------|------------------|-----------------|-------------------------------|
|                                                          |              | s           | P <sub>x</sub> | P <sub>y</sub> | P <sub>z</sub> | d <sub>x<sup>2</sup>-y<sup>2</sup></sub> | d <sub>xz</sub> | d <sub>yz</sub> | d <sub>x<sup>2</sup>-y<sup>2</sup></sub> | d <sub>xy</sub> | ∑ <sub>s,p,d</sub> |                  |                 |                               |
| 98 (O)                                                   | -10.72       | 0.02        | 0.15           | -0.01          | 0.00           | 0.01                                     | 0.00            | 0.02            | 0.08                                     | 0.88            | 98.01              | 0.36             | 0.47            |                               |
| 99 (O)                                                   | -10.21       | 1.66        | 3.92           | 0.00           | 0.10           | 1.25                                     | 0.60            | 0.06            | 6.29                                     | 2.44            | 6.31               | 14.27            | 63.10           |                               |
| 100 (O)                                                  | -9.95        | 0.00        | 0.00           | 0.00           | 0.01           | 0.07                                     | 0.83            | 0.02            | 0.02                                     | 0.00            | 98.64              | 0.19             | 0.23            |                               |
| 101 (O)                                                  | -8.74        | 0.00        | -0.09          | 0.20           | 0.00           | 0.01                                     | 0.02            | 1.43            | 0.08                                     | 54.83           | 17.04              | 23.00            | 3.47            |                               |
| 102 (O)                                                  | -8.27        | 0.00        | 0.08           | 0.00           | 3.20           | 1.84                                     | 30.09           | 29.91           | 1.08                                     | 0.53            | 11.80              | 21.13            | 0.34            |                               |
| <b>103 (O)</b>                                           | <b>-8.16</b> | <b>0.00</b> | <b>0.03</b>    | <b>0.00</b>    | <b>1.51</b>    | <b>2.99</b>                              | <b>27.78</b>    | <b>34.09</b>    | <b>0.55</b>                              | <b>1.20</b>     | <b>14.58</b>       | <b>15.80</b>     | <b>1.46</b>     |                               |
| <b>HOMO-LUMO gap: 2.594 eV (20924.8 cm<sup>-1</sup>)</b> |              |             |                |                |                |                                          |                 |                 |                                          |                 |                    |                  |                 |                               |
| <b>104 (V)</b>                                           | <b>-5.56</b> | <b>0.00</b> | <b>0.97</b>    | <b>0.05</b>    | <b>0.02</b>    | <b>0.05</b>                              | <b>0.02</b>     | <b>0.08</b>     | <b>0.04</b>                              | <b>3.05</b>     | <b>88.16</b>       | <b>4.74</b>      | <b>2.81</b>     |                               |
| 105 (V)                                                  | -5.25        | 0.00        | 0.00           | 0.00           | 0.03           | 0.23                                     | 2.61            | 0.06            | 0.07                                     | 0.01            | 95.69              | 1.14             | 0.16            |                               |
| 106 (V)                                                  | -4.16        | 0.00        | 0.58           | 0.00           | 0.01           | 0.02                                     | 0.00            | 0.00            | 0.00                                     | 0.03            | 98.99              | 0.03             | 0.05            |                               |
| 107 (V)                                                  | -4.09        | 0.00        | 0.01           | 0.00           | 0.25           | 0.19                                     | 2.11            | 0.10            | 0.05                                     | 0.01            | 93.19              | 3.76             | 0.34            |                               |
| 108 (V)                                                  | -3.46        | 0.00        | 0.23           | 0.01           | 0.01           | 0.01                                     | 0.00            | 0.00            | 0.00                                     | 0.17            | 97.79              | 1.47             | 0.29            |                               |
| 109 (V)                                                  | -2.74        | 0.00        | 2.61           | 20.84          | 0.05           | 2.99                                     | 0.03            | 0.01            | 3.49                                     | 0.34            | 2.86               | 54.33            | 12.26           |                               |
| 110 (V)                                                  | -2.55        | 0.00        | 0.72           | 0.00           | 28.90          | 0.40                                     | 5.12            | 6.42            | 0.16                                     | 0.15            | 3.44               | 41.25            | 13.43           |                               |
| 111 (V)                                                  | -2.41        | 0.00        | 0.01           | 0.00           | 0.46           | 0.04                                     | 0.45            | 0.00            | 0.02                                     | 0.00            | 98.71              | 0.13             | 0.17            |                               |
| 112 (V)                                                  | -2.20        | 1.87        | 13.44          | 9.44           | 0.31           | 29.40                                    | 2.49            | 0.00            | 0.04                                     | 2.17            | 21.05              | 15.21            | 4.57            |                               |
| 113 (V)                                                  | -1.65        | 0.09        | 0.04           | 0.40           | 0.78           | 0.06                                     | 2.22            | 12.59           | 0.00                                     | 0.20            | 9.71               | 70.23            | 3.68            |                               |

<sup>a</sup>The orbital occupancy status is given in parenthesis (O = occupied, V = virtual). <sup>b</sup>Sum of the percent population for the three nitrogen, fifteen carbon, and eleven hydrogen atoms present in the terpyridine (2,2';6,2''-terpyridine (tpy); C<sub>15</sub>H<sub>11</sub>N<sub>3</sub>) ligand. <sup>c</sup>Sum of the percent population for the two carbon and two oxygen atoms present in the two carbonyl (CO) ligands. <sup>d</sup>Sum of the percent population for the one phosphorus (P) atom, three carbon, and nine hydrogen atoms present in the trimethylphosphine (PMe<sub>3</sub>) ligand.

**Table S7-A.** Optimized geometry of *mer,cis*-[Re(tpy- $\kappa^3$ N)(CO)<sub>2</sub>(PEt)<sub>3</sub>]<sup>+</sup> (7) in the singlet ground state with E(B3LYP) = - 1627.2272 au.

|    |             |             |             |
|----|-------------|-------------|-------------|
| Re | 2.55807732  | 2.87946704  | -3.05142158 |
| N  | 2.63137618  | 4.97806800  | -3.07529484 |
| C  | 2.46860357  | 5.65241303  | -1.91125022 |
| C  | 2.84182543  | 5.61201236  | -4.25418034 |
| C  | 2.52185283  | 7.04941361  | -1.90359342 |
| C  | 2.23477896  | 4.78022501  | -0.74192270 |
| C  | 2.90219736  | 7.00784033  | -4.29207854 |
| C  | 2.97849660  | 4.69973261  | -5.40787276 |
| C  | 2.74042501  | 7.72301762  | -3.10535291 |
| H  | 2.39423285  | 7.60792791  | -0.98401600 |
| C  | 1.99603706  | 5.27663345  | 0.54163410  |
| N  | 2.24230016  | 3.42812601  | -0.99136316 |
| H  | 3.06974374  | 7.53432269  | -5.22406037 |
| C  | 3.15291872  | 5.15103299  | -6.71815283 |
| N  | 2.90117512  | 3.35682598  | -5.12273376 |
| H  | 2.78240331  | 8.80724391  | -3.11747411 |
| C  | 1.74758479  | 4.39989752  | 1.59373840  |
| H  | 1.99406954  | 6.34634252  | 0.71625960  |
| C  | 1.99159931  | 2.58913009  | 0.03743063  |
| C  | 3.24053223  | 4.23811477  | -7.76522411 |
| H  | 3.21022258  | 6.21425385  | -6.92077983 |
| C  | 2.98061835  | 2.48184673  | -6.14977630 |
| C  | 1.74064461  | 3.03046556  | 1.33147010  |
| H  | 1.55577100  | 4.77937552  | 2.59201342  |
| H  | 1.98999837  | 1.53511493  | -0.21030794 |
| C  | 3.14699534  | 2.87821160  | -7.47196778 |
| H  | 3.37070277  | 4.58276234  | -8.78580821 |
| H  | 2.89770545  | 1.43674592  | -5.87862403 |
| H  | 1.54133394  | 2.30456578  | 2.11239458  |
| H  | 3.19814899  | 2.12526602  | -8.25105068 |
| C  | 2.61951878  | 0.96091793  | -3.00101016 |
| O  | 2.70086391  | -0.20479792 | -2.95256969 |
| C  | 0.64713417  | 2.76488314  | -3.35756841 |
| O  | -0.49365632 | 2.65219746  | -3.53904253 |
| P  | 5.07926492  | 2.68797831  | -2.62811236 |
| C  | 5.90045576  | 1.68026342  | -3.96730308 |
| C  | 7.41743548  | 1.78377176  | -4.18098704 |
| H  | 5.38692052  | 1.95991047  | -4.89397512 |
| H  | 5.60575616  | 0.64181048  | -3.76925844 |
| H  | 7.71389264  | 1.12672745  | -5.00624618 |
| H  | 7.71921262  | 2.80069903  | -4.45167210 |
| H  | 7.98846727  | 1.48226725  | -3.29981027 |
| C  | 5.98487901  | 4.32246828  | -2.54608119 |
| C  | 7.34282202  | 4.40602785  | -1.83346589 |



|   |            |            |             |
|---|------------|------------|-------------|
| H | 5.28800300 | 5.02015801 | -2.06676242 |
| H | 6.07670174 | 4.66184746 | -3.58640960 |
| H | 7.71857343 | 5.43448366 | -1.88002300 |
| H | 7.25828558 | 4.13833927 | -0.77575562 |
| H | 8.09579849 | 3.75878014 | -2.28856487 |
| C | 5.40918348 | 1.80414786 | -1.01605636 |
| C | 6.75396861 | 1.09570795 | -0.79632030 |
| H | 4.60129137 | 1.06907418 | -0.92954380 |
| H | 5.22970571 | 2.54460408 | -0.22570614 |
| H | 6.75880767 | 0.62601019 | 0.19361108  |
| H | 6.91289408 | 0.30079551 | -1.53116826 |
| H | 7.60525991 | 1.77910721 | -0.84141946 |

**Table S7-B.** Calculated singlet excited states of for *mer,cis*-[Re(tpy- $\kappa^3N$ )(CO)<sub>2</sub>(PEt<sub>3</sub>)]<sup>+</sup> (7) in acetonitrile.

| # <sup>a</sup> | E <sub>VER</sub> <sup>b</sup> |                       |      | <i>f</i> <sup>c</sup> | Assignment; MO# →MO# <sup>d</sup>                 |
|----------------|-------------------------------|-----------------------|------|-----------------------|---------------------------------------------------|
|                | nm                            | 1000 cm <sup>-1</sup> | eV   |                       |                                                   |
| 1              | 606.7                         | 16.5                  | 2.04 | 0.0172                | 115 →116(+99%)                                    |
| 2              | 559.9                         | 17.9                  | 2.21 | 0.0117                | 114 →116(+99%)                                    |
| 3              | 500.2                         | 20                    | 2.48 | 0.0054                | 115 →117(+89%) 113 →116(+7%)                      |
| 4              | 472.5                         | 21.2                  | 2.62 | 0.0011                | 114 →117(+87%) 113 →<br>116(+12%)                 |
| 5              | 428.7                         | 23.3                  | 2.89 | 0.0935                | 113 →116(+75%) 115 →117(9%)<br>114 →117(9%)       |
| 6              | 408.4                         | 24.5                  | 3.04 | 0.0203                | 113 →117(+98%)                                    |
| 7              | 363.3                         | 27.5                  | 3.41 | 0.0362                | 115 →118(+89%) 114 →118(5%)                       |
| 8              | 358.1                         | 27.9                  | 3.46 | 0.0079                | 115 →119(+63%) 114 →119(33%)                      |
| 9              | 348.0                         | 28.7                  | 3.56 | 0.0170                | 114 →118(+88%) 112 →116(+6%)                      |
| 10             | 335.9                         | 29.8                  | 3.69 | 0.0354                | 114 →119(+62%) 115 →<br>119(+29%)                 |
| 11             | 314.0                         | 31.8                  | 3.95 | 0.3969                | 112 →116(+73%) 113 →<br>119(+14%)                 |
| 12             | 309.0                         | 32.4                  | 4.01 | 0.0545                | 113 →118(+85%) 113 →119(7%)                       |
| 13             | 307.9                         | 32.5                  | 4.03 | 0.1195                | 113 →119(+77%) 113 →<br>118(+10%)<br>112 →116(8%) |
| 14             | 301.6                         | 33.2                  | 4.11 | 0.0163                | 115 →121(+90%)                                    |
| 15             | 296.9                         | 33.7                  | 4.18 | 0.0000                | 114 →121(+71%) 115 →120(23%)                      |
| 16             | 293.4                         | 34.1                  | 4.23 | 0.0371                | 115 →120(+67%) 114 →<br>121(+24%)                 |
| 17             | 292.9                         | 34.1                  | 4.23 | 0.0326                | 111 →116(+96%)                                    |
| 18             | 283.9                         | 35.2                  | 4.37 | 0.0331                | 115 →122(+83%) 113 →121(+9%)                      |
| 19             | 283.6                         | 35.3                  | 4.37 | 0.0069                | 114 →120(+91%)                                    |
| 20             | 278.4                         | 35.9                  | 4.45 | 0.1285                | 112 →117(+88%)                                    |
| 21             | 275.1                         | 36.4                  | 4.51 | 0.0009                | 115 →123(+83%)                                    |
| 22             | 273.7                         | 36.5                  | 4.53 | 0.0013                | 111 →117(+94%)                                    |
| 23             | 270.3                         | 37                    | 4.59 | 0.0004                | 114 →122(+65%) 113 →<br>121(+23%)                 |
| 24             | 268.8                         | 37.2                  | 4.61 | 0.0065                | 114 →123(+86%)                                    |

|    |       |      |      |        |                                                                                    |
|----|-------|------|------|--------|------------------------------------------------------------------------------------|
| 25 | 258.4 | 38.7 | 4.80 | 0.0103 | 110 →116(+69%) 113 →<br>120(+24%)                                                  |
| 26 | 255.7 | 39.1 | 4.85 | 0.0018 | 113 →122(+92%)                                                                     |
| 27 | 251.9 | 39.7 | 4.92 | 0.2163 | 113 →120(+64%) 110 →116(18%)                                                       |
| 28 | 247.8 | 40.3 | 5.00 | 0.2345 | 110 →117(+92%)                                                                     |
| 29 | 242.4 | 41.3 | 5.12 | 0.0119 | 115 →124(+31%) 112 →119(25%)<br>114 →125(12%) 113 →121(+9%)<br>115 →125(5%)        |
| 30 | 241.5 | 41.4 | 5.13 | 0.0386 | 114 →125(+22%) 115 →<br>124(+19%)<br>113 →121(16%) 112 →119(11%)<br>115 →125(+10%) |

---

<sup>a</sup> # is the state. <sup>b</sup>E<sub>VER</sub> is the energy of the vertical transition. <sup>c</sup>*f* is the oscillator strength. <sup>d</sup>Assignment; MO# →MO# is the occupied and the virtual orbitals that define the transition. The value and phase (+/-) of the transition coefficient for each transition is given in parentheses.

**Table S7-C.** Calculated triplet excited states of for *mer,cis*-[Re(tpy- $\kappa^3$ N)(CO)<sub>2</sub>(PEt<sub>3</sub>)<sup>+</sup> (7) in acetonitrile.

| # <sup>a</sup> | E <sub>VER</sub> <sup>b</sup> |                       |      | <i>f</i> <sup>c</sup> | Assignment; MO# →MO# <sup>d</sup>                          |
|----------------|-------------------------------|-----------------------|------|-----------------------|------------------------------------------------------------|
|                | nm                            | 1000 cm <sup>-1</sup> | eV   |                       |                                                            |
| 1              | 650.4                         | 15.4                  | 1.91 | 0.0000                | 115 →116(+94%)                                             |
| 2              | 581.4                         | 17.2                  | 2.13 | 0.0000                | 114 →116(+95%)                                             |
| 3              | 553.5                         | 18.1                  | 2.24 | 0.0000                | 115 →117(+81%) 114 →117(+9%)                               |
| 4              | 512.8                         | 19.5                  | 2.42 | 0.0000                | 113 →116(+94%)                                             |
| 5              | 486.8                         | 20.5                  | 2.55 | 0.0000                | 114 →117(+86%) 115 →117(11%)                               |
| 6              | 427.5                         | 23.4                  | 2.90 | 0.0000                | 113 →117(+95%)                                             |
| 7              | 397.2                         | 25.2                  | 3.12 | 0.0000                | 115 →119(+39%) 112 →117(24%)<br>114 →119(+6%) 115 →117(6%) |
| 8              | 388.7                         | 25.7                  | 3.19 | 0.0000                | 115 →118(+71%) 114 →118(+8%)                               |
| 9              | 385.8                         | 25.9                  | 3.21 | 0.0000                | 112 →117(+44%) 115 →<br>119(+40%)                          |
| 10             | 376.8                         | 26.5                  | 3.29 | 0.0000                | 112 →116(+77%) 115 →118(9%)<br>110 →117(6%)                |

<sup>a</sup> # is the state. <sup>b</sup>E<sub>VER</sub> is the energy of the vertical transition. <sup>c</sup>*f* is the oscillator strength. <sup>d</sup>Assignment; MO# →MO# is the occupied and the virtual orbitals that define the transition. The value and phase (+/-) of the transition coefficient for each transition is given in parentheses.

**Table S7-D. The Fragment Analysis Based on Mullikan Populations for *mer,cis*-[Re(tpy-κ<sup>3</sup>N)(CO)<sub>2</sub>(PEt<sub>3</sub>)<sup>+</sup>] (7) in the Singlet Ground State.<sup>a</sup>**

| molecular orbital                                   | E, eV        | Re          |                |                |                |                                          |                 |                 |                                          |                 |                    | tpy <sup>b</sup> | CO <sup>c</sup> | PEt <sub>3</sub> <sup>d</sup> |                    |                    |             |             |
|-----------------------------------------------------|--------------|-------------|----------------|----------------|----------------|------------------------------------------|-----------------|-----------------|------------------------------------------|-----------------|--------------------|------------------|-----------------|-------------------------------|--------------------|--------------------|-------------|-------------|
|                                                     |              | s           | P <sub>x</sub> | P <sub>y</sub> | P <sub>z</sub> | d <sub>x<sup>2</sup>-y<sup>2</sup></sub> | d <sub>xz</sub> | d <sub>yz</sub> | d <sub>x<sup>2</sup>-y<sup>2</sup></sub> | d <sub>xy</sub> | Σ <sub>s,p,d</sub> |                  |                 |                               | Σ <sub>s,p,d</sub> | Σ <sub>s,p,d</sub> |             |             |
| 109 (O)                                             |              |             |                |                |                |                                          |                 |                 |                                          |                 |                    |                  |                 |                               |                    |                    |             |             |
| 110 (O)                                             | -10.68       | 0.00        | 0.09           | -0.01          | 0.00           | 0.00                                     | 0.00            | 0.00            | 0.00                                     | 0.02            | 0.02               | 0.04             | 0.89            | 97.59                         | 0.33               | 1.04               | 1.04        | 1.04        |
| 111 (O)                                             | -10.12       | 1.79        | 4.48           | 0.00           | 0.12           | 1.26                                     | 0.53            | 0.05            | 6.19                                     | 2.12            | 2.12               | 6.19             | 2.12            | 5.26                          | 13.22              | 64.99              | 64.99       | 64.99       |
| 112 (O)                                             | -9.91        | 0.00        | 0.00           | 0.00           | 0.01           | 0.06                                     | 0.76            | 0.02            | 0.03                                     | 0.00            | 0.03               | 0.00             | 0.00            | 98.13                         | 0.18               | 0.81               | 0.81        | 0.81        |
| 113 (O)                                             | -8.72        | 0.01        | -0.05          | 0.21           | 0.00           | 0.01                                     | 0.03            | 1.42            | 0.08                                     | 54.67           | 54.67              | 54.67            | 54.67           | 16.79                         | 22.90              | 3.94               | 3.94        | 3.94        |
| 114 (O)                                             | -8.24        | 0.00        | 0.07           | 0.00           | 3.04           | 1.98                                     | 31.81           | 28.01           | 1.11                                     | 0.47            | 12.19              | 20.80            | 20.80           | 12.19                         | 20.80              | 0.52               | 0.52        | 0.52        |
| <b>115 (O)</b>                                      | <b>-8.13</b> | <b>0.00</b> | <b>0.04</b>    | <b>0.00</b>    | <b>1.66</b>    | <b>2.82</b>                              | <b>25.88</b>    | <b>36.03</b>    | <b>0.49</b>                              | <b>1.25</b>     | <b>14.06</b>       | <b>16.03</b>     | <b>16.03</b>    | <b>14.06</b>                  | <b>16.03</b>       | <b>1.73</b>        | <b>1.73</b> | <b>1.73</b> |
| HOMO-LUMO gap: 2.594 eV (20920.4 cm <sup>-1</sup> ) |              |             |                |                |                |                                          |                 |                 |                                          |                 |                    |                  |                 |                               |                    |                    |             |             |
| <b>116 (V)</b>                                      | <b>-5.54</b> | <b>0.01</b> | <b>0.96</b>    | <b>0.05</b>    | <b>0.02</b>    | <b>0.05</b>                              | <b>0.02</b>     | <b>0.09</b>     | <b>0.05</b>                              | <b>2.99</b>     | <b>2.99</b>        | <b>2.99</b>      | <b>2.99</b>     | <b>88.29</b>                  | <b>4.65</b>        | <b>2.81</b>        | <b>2.81</b> | <b>2.81</b> |
| 117 (V)                                             | -5.22        | 0.00        | 0.00           | 0.00           | 0.00           | 0.03                                     | 0.22            | 2.57            | 0.06                                     | 0.02            | 0.02               | 0.06             | 0.02            | 95.72                         | 1.12               | 0.20               | 0.20        | 0.20        |
| 118 (V)                                             | -4.13        | 0.00        | 0.52           | 0.00           | 0.02           | 0.01                                     | 0.04            | 0.00            | 0.00                                     | 0.03            | 0.00               | 0.00             | 0.03            | 98.77                         | 0.07               | 0.54               | 0.54        | 0.54        |
| 119 (V)                                             | -4.06        | 0.00        | 0.01           | 0.00           | 0.32           | 0.21                                     | 2.03            | 0.11            | 0.06                                     | 0.01            | 0.06               | 0.01             | 0.01            | 92.94                         | 3.77               | 0.55               | 0.55        | 0.55        |
| 120 (V)                                             | -3.43        | 0.00        | 0.20           | 0.01           | 0.01           | 0.01                                     | 0.00            | 0.01            | 0.00                                     | 0.18            | 0.18               | 0.18             | 0.18            | 97.74                         | 1.46               | 0.40               | 0.40        | 0.40        |
| 121 (V)                                             | -2.76        | 0.01        | 2.38           | 20.35          | 0.27           | 2.63                                     | 0.00            | 0.00            | 3.47                                     | 0.29            | 2.60               | 52.66            | 52.66           | 2.60                          | 40.12              | 16.70              | 16.70       | 16.70       |
| 122 (V)                                             | -2.56        | 0.00        | 0.66           | 0.09           | 27.78          | 0.26                                     | 5.02            | 5.99            | 0.20                                     | 0.12            | 3.07               | 40.12            | 40.12           | 3.07                          | 0.13               | 0.47               | 0.47        | 0.47        |
| 123 (V)                                             | -2.39        | 0.00        | 0.03           | 0.00           | 0.38           | 0.03                                     | 0.41            | 0.00            | 0.03                                     | 0.00            | 0.03               | 0.00             | 0.00            | 98.53                         | 0.13               | 0.47               | 0.47        | 0.47        |
| 124 (V)                                             | -2.20        | 1.33        | 15.75          | 8.63           | 0.29           | 29.87                                    | 2.50            | 0.00            | 0.21                                     | 2.12            | 20.44              | 13.59            | 13.59           | 20.44                         | 13.59              | 5.27               | 5.27        | 5.27        |
| 125 (V)                                             | -1.63        | 0.28        | 1.21           | 0.15           | 0.40           | 0.02                                     | 1.42            | 12.82           | 0.25                                     | 0.12            | 10.04              | 65.90            | 65.90           | 10.04                         | 7.39               | 7.39               | 7.39        | 7.39        |

<sup>a</sup>The orbital occupancy status is given in parenthesis (O = occupied, V = virtual). <sup>b</sup>Sum of the percent population for the three nitrogen, fifteen carbon, and eleven hydrogen atoms present in the terpyridine (2,2';6',2''-terpyridine (tpy); C<sub>15</sub>H<sub>11</sub>N<sub>3</sub>) ligand. <sup>c</sup>Sum of the percent population for the two carbon and two oxygen atoms present in the two carbonyl (CO) ligands. <sup>d</sup>Sum of the percent population for the one phosphorus (P) atom, six carbon, and fifteen hydrogen atoms present in the triethylphosphine (PEt<sub>3</sub>) ligand.

**Table S8-A.** Optimized geometry of *mer,cis*-[Re(tpy- $\kappa^3$ N)(CO)<sub>2</sub>(PPh<sub>3</sub>)]<sup>+</sup> (8) in the singlet ground state with E(B3LYP) = - 2084.4196 au.

|    |             |             |             |
|----|-------------|-------------|-------------|
| Re | 0.17309688  | -0.10467847 | -0.02318131 |
| N  | -1.94717145 | -0.29405216 | 0.38393341  |
| C  | -2.93013561 | -0.50719729 | -0.51622391 |
| C  | -2.30401278 | -0.10021682 | 1.69621252  |
| C  | -4.27608047 | -0.56428843 | -0.17315072 |
| H  | -2.60643846 | -0.62455315 | -1.54494715 |
| C  | -3.64002952 | -0.15919827 | 2.09833900  |
| C  | -4.64101765 | -0.39792915 | 1.16144284  |
| H  | -5.01851723 | -0.73609603 | -0.94910557 |
| H  | -3.89828721 | -0.00856999 | 3.14317802  |
| H  | -5.68434390 | -0.44113371 | 1.46756108  |
| N  | 0.01681921  | 0.26551481  | 2.04404262  |
| C  | -1.20202424 | 0.21721686  | 2.62818302  |
| C  | 1.13555922  | 0.58066747  | 2.73651464  |
| C  | -1.33317405 | 0.49717908  | 3.99089938  |
| C  | 1.05105656  | 0.88008814  | 4.09883854  |
| C  | -0.19480911 | 0.83315413  | 4.72263083  |
| H  | -2.30345735 | 0.46492448  | 4.47834480  |
| H  | 1.93637128  | 1.14771270  | 4.66904598  |
| H  | -0.28003210 | 1.06348703  | 5.78277516  |
| C  | 0.37471036  | -0.45586480 | -1.89750777 |
| O  | 0.52957895  | -0.65561486 | -3.04030102 |
| C  | -0.05784675 | 1.75411668  | -0.48758088 |
| O  | -0.19788927 | 2.86300436  | -0.80223497 |
| C  | 2.36624893  | 0.58423046  | 1.91972001  |
| C  | 3.62226241  | 0.89926717  | 2.44159526  |
| N  | 2.20512339  | 0.27585469  | 0.59034105  |
| C  | 4.73814049  | 0.91991624  | 1.60931773  |
| H  | 3.72679276  | 1.13753345  | 3.49692851  |
| C  | 3.29409249  | 0.30620631  | -0.20617147 |
| C  | 4.56551876  | 0.62336059  | 0.25909517  |
| H  | 5.71919435  | 1.16969132  | 2.00825946  |
| H  | 3.11811464  | 0.07297637  | -1.25092385 |
| H  | 5.40109464  | 0.63432400  | -0.43694450 |
| P  | 0.46915700  | -2.65139551 | 0.41587278  |
| C  | 2.15576525  | -3.33881676 | 0.08440573  |
| C  | 2.77377054  | -4.29735655 | 0.90290604  |
| C  | 2.79118836  | -2.95834911 | -1.10979021 |
| C  | 4.00928642  | -4.84166574 | 0.54630131  |
| H  | 2.29514901  | -4.63082352 | 1.82086658  |
| C  | 4.02062196  | -3.51242860 | -1.46817906 |
| H  | 2.31353142  | -2.24816882 | -1.78223050 |
| C  | 4.63699143  | -4.44962226 | -0.63688721 |
| H  | 4.47635892  | -5.58274018 | 1.19383467  |

|   |             |             |             |
|---|-------------|-------------|-------------|
| H | 4.49329344  | -3.21513054 | -2.40355408 |
| H | 5.59763064  | -4.88064945 | -0.91538916 |
| C | -0.59137521 | -3.83421910 | -0.53056036 |
| C | -0.63369407 | -5.19118192 | -0.16107845 |
| C | -1.28904754 | -3.42366777 | -1.67372994 |
| C | -1.37522064 | -6.10465569 | -0.90694259 |
| H | -0.08384578 | -5.53905152 | 0.71189889  |
| C | -2.02654126 | -4.34283531 | -2.42528744 |
| H | -1.23781053 | -2.38920375 | -1.99909970 |
| C | -2.07567554 | -5.68182539 | -2.04078484 |
| H | -1.40000192 | -7.15154699 | -0.60742487 |
| H | -2.55554902 | -4.00882672 | -3.31694944 |
| H | -2.64963230 | -6.39874933 | -2.62626441 |
| C | 0.10616322  | -3.05413369 | 2.18137374  |
| C | -1.16832335 | -3.50210381 | 2.56742676  |
| C | 1.05900040  | -2.79735095 | 3.18346258  |
| C | -1.47074736 | -3.71487944 | 3.91438419  |
| H | -1.92493063 | -3.70889912 | 1.81303864  |
| C | 0.75595275  | -3.01619916 | 4.52796489  |
| H | 2.05433823  | -2.44699728 | 2.91327026  |
| C | -0.50933642 | -3.47814268 | 4.89783242  |
| H | -2.45894980 | -4.07998264 | 4.19194283  |
| H | 1.51507704  | -2.83473616 | 5.28810790  |
| H | -0.74147346 | -3.65861835 | 5.94656081  |

**Table S8-B.** Calculated singlet excited states of for *mer,cis*-[Re(tpy-κ<sup>3</sup>N)(CO)<sub>2</sub>(PPh<sub>3</sub>)<sup>+</sup> (8) in acetonitrile.

| # <sup>a</sup> | E <sub>VER</sub> <sup>b</sup> |                       |      | <i>f</i> <sup>c</sup> | Assignment; MO# →MO# <sup>d</sup>                                            |
|----------------|-------------------------------|-----------------------|------|-----------------------|------------------------------------------------------------------------------|
|                | nm                            | 1000 cm <sup>-1</sup> | eV   |                       |                                                                              |
| 1              | 579.5                         | 17.3                  | 2.14 | 0.0134                | 151 →152(+99%)                                                               |
| 2              | 530.3                         | 18.9                  | 2.34 | 0.0128                | 150 →152(+99%)                                                               |
| 3              | 481.1                         | 20.8                  | 2.58 | 0.0053                | 151 →153(+93%)                                                               |
| 4              | 450.2                         | 22.2                  | 2.75 | 0.0017                | 150 →153(+85%) 149 →152(14%)                                                 |
| 5              | 415.2                         | 24.1                  | 2.99 | 0.0813                | 149 →152(+76%) 150 →153(+11%)<br>151 →153(+6%)                               |
| 6              | 391.1                         | 25.6                  | 3.17 | 0.0173                | 149 →153(+97%)                                                               |
| 7              | 355.2                         | 28.2                  | 3.49 | 0.0179                | 151 →154(+90%)                                                               |
| 8              | 351.0                         | 28.5                  | 3.53 | 0.0059                | 151 →155(+76%) 150 →155(19%)                                                 |
| 9              | 340.3                         | 29.4                  | 3.64 | 0.0131                | 148 →152(+60%) 150 →154(23%)<br>147 →152(+11%)                               |
| 10             | 337.2                         | 29.7                  | 3.68 | 0.0082                | 150 →154(+59%) 148 →152(+13%)<br>146 →152(8%) 147 →152(+8%)<br>150 →155(+5%) |
| 11             | 326.8                         | 30.4                  | 3.77 | 0.0151                | 147 →152(+69%) 148 →152(16%)                                                 |
| 12             | 327.6                         | 30.5                  | 3.78 | 0.0017                | 151 →156(+72%) 151 →157(+6%)<br>147 →152(+6%)                                |
| 13             | 326.8                         | 30.6                  | 3.79 | 0.0271                | 150 →155(+65%) 151 →155(+17%)                                                |
| 14             | 319.1                         | 31.3                  | 3.89 | 0.0207                | 145 →152(+74%) 146 →152(+11%)<br>143 →152(6%)                                |
| 15             | 316.7                         | 31.6                  | 3.92 | 0.2654                | 146 →152(+63%) 148 →153(9%)<br>150 →154(+8%)                                 |
| 16             | 313.0                         | 32.0                  | 3.96 | 0.0277                | 148 →153(+53%) 147 →153(+19%)<br>150 →156(+10%) 146 →152(+5%)                |
| 17             | 312.1                         | 32.0                  | 3.97 | 0.0218                | 150 →156(+59%) 150 →157(+9%)<br>148 →153(6%) 150 →162(5%)                    |
| 18             | 305.5                         | 32.7                  | 4.06 | 0.1144                | 144 →152(+48%) 143 →152(29%)                                                 |
| 19             | 304.6                         | 32.8                  | 4.07 | 0.0913                | 151 →157(+71%) 151 →156(9%)<br>151 →158(+7%)                                 |
| 20             | 303.1                         | 33.0                  | 4.09 | 0.0130                | 147 →153(+57%) 143 →152(15%)<br>148 →153(14%) 145 →153(+6%)                  |
| 21             | 302.8                         | 33.0                  | 4.09 | 0.0165                | 144 →152(+43%) 143 →152(+36%)<br>147 →153(+6%)                               |
| 22             | 301.2                         | 33.2                  | 4.12 | 0.0176                | 151 →158(+61%) 149 →154(+6%)<br>151 →157(6%)                                 |
| 23             | 300.4                         | 33.3                  | 4.13 | 0.0477                | 149 →155(+68%) 149 →154(22%)                                                 |
| 24             | 299.2                         | 33.4                  | 4.14 | 0.0219                | 149 →154(+63%) 149 →155(+18%)<br>151 →158(9%)                                |



|    |       |      |      |        |                                                                                                         |
|----|-------|------|------|--------|---------------------------------------------------------------------------------------------------------|
| 25 | 295.0 | 33.9 | 4.20 | 0.0023 | 145 →153(+58%) 146 →153(+16%)<br>143 →153(11%) 148 →153(+6%)<br>151 →162(+33%) 151 →159(17%)            |
| 26 | 292.2 | 34.2 | 4.24 | 0.0003 | 151 →163(11%) 151 →165(6%)<br>150 →157(+5%) 151 →157(+5%)<br>150 →157(+53%) 150 →156(17%)               |
| 27 | 289.8 | 34.5 | 4.28 | 0.0071 | 150 →162(8%) 151 →162(5%)<br>151 →159(+69%) 151 →165(8%)<br>151 →160(6%) 151 →162(+5%)<br>150 →157(+5%) |
| 28 | 289.2 | 34.6 | 4.29 | 0.0147 | 146 →153(+61%) 142 →152(13%)<br>143 →153(+8%)                                                           |
| 29 | 287.3 | 34.8 | 4.32 | 0.0171 | 150 →158(+51%) 150 →162(+8%)<br>150 →157(+6%)                                                           |
| 30 | 286.3 | 34.9 | 4.33 | 0.0026 |                                                                                                         |

---

<sup>a</sup> # is the state. <sup>b</sup>E<sub>VER</sub> is the energy of the vertical transition. <sup>c</sup>*f* is the oscillator strength. <sup>d</sup>Assignment; MO# →MO# is the occupied and the virtual orbitals that define the transition. The value and phase (+/-) of the transition coefficient for each transition is given in parentheses.

**Table S8-C.** Calculated triplet excited states of for *mer,cis*-[Re(tpy- $\kappa^3$ N)(CO)<sub>2</sub>(PPh<sub>3</sub>)]<sup>+</sup> (8) in acetonitrile.

| # <sup>a</sup> | E <sub>VER</sub> <sup>b</sup> |                       |      | <i>f</i> <sup>c</sup> | Assignment; MO# →MO# <sup>d</sup>                                                                          |
|----------------|-------------------------------|-----------------------|------|-----------------------|------------------------------------------------------------------------------------------------------------|
|                | nm                            | 1000 cm <sup>-1</sup> | eV   |                       |                                                                                                            |
| 1              | 616.6                         | 16.2                  | 2.01 | 0.0000                | 151 →152(+93%)                                                                                             |
| 2              | 552.6                         | 18.1                  | 2.24 | 0.0000                | 150 →152(+94%)                                                                                             |
| 3              | 528.2                         | 18.9                  | 2.35 | 0.0000                | 151 →153(+75%) 150 →<br>153(+12%)                                                                          |
| 4              | 485.2                         | 20.6                  | 2.56 | 0.0000                | 149 →152(+88%)                                                                                             |
| 5              | 466.2                         | 21.4                  | 2.66 | 0.0000                | 150 →153(+80%) 151 →153(15%)                                                                               |
| 6              | 408.9                         | 24.5                  | 3.03 | 0.0000                | 149 →153(+86%)                                                                                             |
| 7              | 391.1                         | 25.6                  | 3.17 | 0.0000                | 145 →153(+21%) 146 →153(19%)<br>143 →153(+9%) 150 →153(+6%)<br>151 →155(6%) 141 →152(+6%)<br>151 →153(+5%) |
| 8              | 379.4                         | 26.4                  | 3.27 | 0.0000                | 145 →152(+22%) 146 →152(22%)<br>143 →152(+10%) 149 →153(9%)<br>151 →155(+8%) 141 →153(+6%)                 |
| 9              | 379.1                         | 26.4                  | 3.27 | 0.0000                | 151 →155(+54%) 151 →154(10%)<br>150 →155(+9%) 145 →153(+6%)                                                |
| 10             | 373.4                         | 26.8                  | 3.32 | 0.0000                | 151 →154(+63%) 150 →154(+7%)<br>151 →155(+7%) 145 →152(5%)                                                 |

<sup>a</sup> # is the state. <sup>b</sup>E<sub>VER</sub> is the energy of the vertical transition. <sup>c</sup>*f* is the oscillator strength. <sup>d</sup>Assignment; MO# →MO# is the occupied and the virtual orbitals that define the transition. The value and phase (+/-) of the transition coefficient for each transition is given in parentheses.

**Table S8-D. The Fragment Analysis Based on Mullikan Populations for *mer,cis*-[Re(tpy-κ<sup>3</sup>N)(CO)<sub>2</sub>(PPh<sub>3</sub>)]<sup>+</sup> (**8**) in the Singlet Ground State.<sup>a</sup>**

| molecular orbital                                   | E, eV | Re    |                |                |                |                                          |                 |                                          |                 |                  |                   | CO <sup>c</sup> | PPh <sub>3</sub> <sup>d</sup> |       |
|-----------------------------------------------------|-------|-------|----------------|----------------|----------------|------------------------------------------|-----------------|------------------------------------------|-----------------|------------------|-------------------|-----------------|-------------------------------|-------|
|                                                     |       | s     | P <sub>x</sub> | P <sub>y</sub> | P <sub>z</sub> | d <sub>x<sup>2</sup>-y<sup>2</sup></sub> | d <sub>yz</sub> | d <sub>x<sup>2</sup>-y<sup>2</sup></sub> | d <sub>xy</sub> | tpy <sup>b</sup> | ∑ <sub>sp,d</sub> |                 |                               |       |
| 143 (O)                                             | -9.71 | 0.00  | 0.01           | 0.39           | 0.15           | 0.06                                     | 0.01            | 0.23                                     | 0.06            | 0.00             | 0.00              | 8.51            | 0.46                          | 90.12 |
| 144 (O)                                             | -9.47 | 0.00  | 0.05           | 0.00           | 0.00           | 0.02                                     | 0.09            | 0.00                                     | 0.03            | 0.25             | 0.00              | 9.08            | 0.12                          | 90.35 |
| 145 (O)                                             | -9.44 | 0.04  | 0.00           | -0.02          | 0.03           | 0.05                                     | 0.01            | 0.48                                     | 0.02            | 0.02             | 0.02              | 2.28            | 0.50                          | 96.60 |
| 146 (O)                                             | -9.34 | 0.00  | 0.12           | 0.00           | 0.00           | 0.01                                     | 0.18            | 0.03                                     | 0.02            | 0.27             | 0.00              | 2.32            | 0.52                          | 96.52 |
| 147 (O)                                             | -9.27 | 0.00  | 0.03           | 0.01           | 0.00           | 0.01                                     | 0.06            | 0.00                                     | 0.07            | 0.44             | 0.00              | 37.06           | 0.17                          | 62.15 |
| 148 (O)                                             | -9.05 | 0.38  | 0.02           | 2.80           | 0.30           | 0.33                                     | 0.04            | 1.61                                     | 2.16            | 0.07             | 0.00              | 2.54            | 6.63                          | 83.11 |
| 149 (O)                                             | -8.70 | 0.03  | 0.00           | 0.03           | 0.03           | 7.21                                     | 0.40            | 44.77                                    | 2.38            | 1.67             | 0.00              | 12.29           | 25.03                         | 6.17  |
| 150 (O)                                             | -8.15 | 0.00  | 1.06           | 0.02           | 0.02           | 0.79                                     | 17.77           | 0.02                                     | 2.08            | 41.33            | 0.00              | 15.87           | 18.30                         | 2.74  |
| 151 (O)                                             | -7.98 | 0.00  | 2.78           | 0.06           | 0.05           | 2.08                                     | 42.25           | 2.19                                     | 4.29            | 15.73            | 0.00              | 7.91            | 19.46                         | 3.20  |
| HOMO-LUMO gap: 2.769 eV (22329.4 cm <sup>-1</sup> ) |       |       |                |                |                |                                          |                 |                                          |                 |                  |                   |                 |                               |       |
| 152 (V)                                             | -5.21 | 0.03  | 0.01           | 0.42           | 0.14           | 0.09                                     | 0.03            | 2.10                                     | 0.00            | 0.03             | 0.00              | 87.27           | 4.05                          | 5.83  |
| 153 (V)                                             | -5.11 | 0.00  | 0.01           | 0.00           | 0.00           | 0.00                                     | 0.01            | 0.01                                     | 0.14            | 1.55             | 0.00              | 90.26           | 0.66                          | 7.37  |
| 154 (V)                                             | -4.04 | 0.00  | 0.01           | 0.51           | 0.12           | 0.01                                     | 0.00            | -0.02                                    | 0.04            | 0.00             | 0.00              | 92.20           | 0.06                          | 7.07  |
| 155 (V)                                             | -3.97 | 0.00  | 0.48           | 0.01           | 0.01           | 0.00                                     | 0.00            | 0.04                                     | 0.23            | 2.29             | 0.00              | 89.84           | 4.68                          | 2.43  |
| 156 (V)                                             | -3.62 | -0.27 | 0.08           | 2.94           | 0.13           | 0.29                                     | 0.01            | 0.76                                     | 0.58            | 0.03             | 0.00              | 41.16           | 3.06                          | 51.22 |
| 157 (V)                                             | -3.29 | -0.14 | 0.08           | 1.98           | 0.05           | 0.30                                     | 0.00            | 0.46                                     | 0.97            | 0.07             | 0.00              | 24.95           | 5.21                          | 66.07 |
| 158 (V)                                             | -3.17 | 0.00  | 0.60           | 0.11           | 0.10           | 0.03                                     | 0.09            | 0.01                                     | 0.00            | -0.02            | 0.00              | 17.08           | 0.67                          | 81.34 |
| 159 (V)                                             | -2.95 | -0.11 | 0.02           | 0.74           | 4.38           | 0.93                                     | 0.02            | 0.06                                     | 0.88            | 0.13             | 0.00              | 14.49           | 8.49                          | 69.98 |
| 161 (V)                                             | -2.82 | 0.20  | 0.11           | 0.09           | 0.37           | 0.21                                     | 0.04            | 0.07                                     | 0.09            | 0.02             | 0.00              | 26.73           | 0.47                          | 71.59 |
| 162 (V)                                             | -2.56 | 0.00  | 0.15           | 0.12           | 0.13           | 0.00                                     | 0.45            | 0.02                                     | 0.02            | 0.23             | 0.00              | 13.91           | 1.31                          | 83.76 |
| 163 (V)                                             | -2.37 | -0.48 | 0.00           | 0.12           | 10.59          | 4.65                                     | 0.06            | 0.14                                     | 2.16            | 0.32             | 0.00              | 4.41            | 43.11                         | 34.91 |
| 164 (V)                                             | -2.20 | -0.01 | 10.63          | 0.25           | 0.02           | 0.06                                     | 3.86            | 0.04                                     | 0.08            | 1.68             | 0.00              | 51.10           | 14.32                         | 17.99 |

<sup>a</sup>The orbital occupancy status is given in parenthesis (O = occupied, V = virtual). <sup>b</sup>Sum of the percent population for the three nitrogen, fifteen carbon, and eleven hydrogen atoms present in the terpyridine (2,2',6',2''-terpyridine (tpy); C<sub>15</sub>H<sub>11</sub>N<sub>3</sub>) ligand. <sup>c</sup>Sum of the percent population for the two carbon and two oxygen atoms present in the two carbonyl (CO) ligands. <sup>d</sup>Sum of the percent population for the one phosphorus (P) atom, eighteen carbon, and fifteen hydrogen atoms present in the triphenylphosphine (PPh<sub>3</sub>) ligand.

**Table S9-A.** Optimized geometry of *mer,cis*-[Re(tpy-κ<sup>3</sup>N)(CO)<sub>2</sub>(P(OMe)<sub>3</sub>)<sup>+</sup> (9) in the singlet ground state with E(B3LYP) = - 1734.9320 au.

|    |             |             |             |
|----|-------------|-------------|-------------|
| Re | 0.32835803  | -0.08430962 | -0.15601948 |
| N  | -1.80048115 | -0.29253322 | 0.14059302  |
| C  | -2.72843818 | -0.49782491 | -0.81743196 |
| C  | -2.22623861 | -0.13257189 | 1.43518860  |
| C  | -4.09113496 | -0.56568803 | -0.54891223 |
| H  | -2.34353933 | -0.60137867 | -1.82779762 |
| C  | -3.58209398 | -0.19801484 | 1.76221740  |
| C  | -4.52900575 | -0.41876296 | 0.76615688  |
| H  | -4.78991283 | -0.72856261 | -1.36634453 |
| H  | -3.89851242 | -0.06659747 | 2.79365581  |
| H  | -5.58769793 | -0.46636109 | 1.01308737  |
| N  | 0.07131068  | 0.23997460  | 1.90975787  |
| C  | -1.17089552 | 0.13777026  | 2.43476500  |
| C  | 1.16020803  | 0.48942755  | 2.67058688  |
| C  | -1.35898811 | 0.29372835  | 3.81059463  |
| C  | 1.02028398  | 0.65614185  | 4.05081234  |
| C  | -0.25066432 | 0.55537553  | 4.61584443  |
| H  | -2.34751887 | 0.21189451  | 4.25388137  |
| H  | 1.88193495  | 0.85776785  | 4.68112339  |
| H  | -0.37822534 | 0.68064347  | 5.68929213  |
| C  | 0.56942078  | -0.50443767 | -2.01600786 |
| O  | 0.71945960  | -0.77676941 | -3.14248349 |
| C  | 0.09184247  | 1.77690376  | -0.67782354 |
| O  | -0.04079667 | 2.87303762  | -1.02826328 |
| C  | 2.42327137  | 0.56930235  | 1.90672590  |
| C  | 3.64747747  | 0.88964771  | 2.49665891  |
| N  | 2.32668231  | 0.33414527  | 0.55847878  |
| C  | 4.79474004  | 0.98447471  | 1.71406709  |
| H  | 3.70257945  | 1.07421281  | 3.56629496  |
| C  | 3.44364102  | 0.43884656  | -0.19139406 |
| C  | 4.68660878  | 0.75986691  | 0.34270283  |
| H  | 5.75130647  | 1.23766755  | 2.16679631  |
| H  | 3.31212566  | 0.26142953  | -1.25460441 |
| H  | 5.54922061  | 0.83356096  | -0.31568824 |
| P  | 0.63678296  | -2.48568508 | 0.35943994  |
| O  | 1.42921711  | -3.47122365 | -0.67085602 |
| O  | -0.69070498 | -3.40083607 | 0.57998617  |
| O  | 1.36578544  | -2.66871181 | 1.79592262  |
| C  | 1.55562952  | -3.97239509 | 2.40006170  |
| H  | 2.22985290  | -3.81834334 | 3.24706612  |
| H  | 0.59428995  | -4.36577831 | 2.74558584  |
| H  | 2.00745694  | -4.66723747 | 1.68333936  |
| C  | 2.69431955  | -3.12078703 | -1.26260551 |
| H  | 2.56307952  | -2.33356870 | -2.01302924 |

|   |             |             |             |
|---|-------------|-------------|-------------|
| H | 3.41354296  | -2.80420084 | -0.49607418 |
| H | 3.06135242  | -4.02897798 | -1.74939690 |
| C | -1.41176806 | -3.97649216 | -0.52687573 |
| H | -0.79826884 | -4.73096144 | -1.02954561 |
| H | -2.30413299 | -4.44138956 | -0.09818359 |
| H | -1.71025460 | -3.20387022 | -1.24760684 |

**Table S9-B.** Calculated singlet excited states of for *mer,cis*-[Re(tpy- $\kappa^3N$ )(CO)<sub>2</sub>(P(OMe)<sub>3</sub>)<sup>+</sup> (9) in acetonitrile.

| # <sup>a</sup> | E <sub>VER</sub> <sup>b</sup> |                       |      | <i>f</i> <sup>c</sup> | Assignment; MO# →MO# <sup>d</sup>                           |
|----------------|-------------------------------|-----------------------|------|-----------------------|-------------------------------------------------------------|
|                | nm                            | 1000 cm <sup>-1</sup> | eV   |                       |                                                             |
| 1              | 557.4                         | 17.9                  | 2.22 | 0.0095                | 115 →116(+99%)                                              |
| 2              | 520.8                         | 19.2                  | 2.38 | 0.0189                | 114 →116(+99%)                                              |
| 3              | 465.0                         | 21.5                  | 2.67 | 0.0044                | 115 →117(+93%)                                              |
| 4              | 439.9                         | 22.7                  | 2.82 | 0.0046                | 114 →117(+85%) 113 →<br>116(+13%)                           |
| 5              | 399.0                         | 25.1                  | 3.11 | 0.0861                | 113 →116(+79%) 114 →117(10%)                                |
| 6              | 375.7                         | 26.6                  | 3.30 | 0.0152                | 113 →117(+97%)                                              |
| 7              | 346.8                         | 28.8                  | 3.57 | 0.0085                | 115 →118(+91%)                                              |
| 8              | 344.7                         | 29.0                  | 3.60 | 0.0044                | 115 →119(+82%) 114 →<br>119(+14%)                           |
| 9              | 334.2                         | 29.9                  | 3.71 | 0.0001                | 114 →118(+74%) 112 →<br>116(+20%)                           |
| 10             | 321.3                         | 31.1                  | 3.86 | 0.0383                | 114 →119(+73%) 115 →119(12%)<br>114 →118(5%)                |
| 11             | 311.1                         | 32.1                  | 3.98 | 0.4941                | 112 →116(+61%) 114 →118(13%)<br>115 →121(7%)                |
| 12             | 306.0                         | 32.7                  | 4.05 | 0.1218                | 115 →121(+59%) 115 →122(10%)<br>112 →116(+9%) 115 →120(+8%) |
| 13             | 301.8                         | 33.1                  | 4.11 | 0.0041                | 114 →121(+58%) 114 →122(15%)<br>114 →120(+14%) 115 →121(6%) |
| 14             | 294.8                         | 33.9                  | 4.21 | 0.0214                | 115 →122(+68%) 115 →<br>121(+19%) 115 →120(6%)              |
| 15             | 291.6                         | 34.3                  | 4.25 | 0.0174                | 113 →118(+52%) 113 →119(43%)                                |
| 16             | 290.8                         | 34.4                  | 4.26 | 0.0092                | 113 →119(+52%) 113 →<br>118(+39%) 112 →117(6%)              |
| 17             | 283.8                         | 35.2                  | 4.37 | 0.0118                | 115 →120(+69%) 115 →<br>122(+13%) 115 →123(6%)              |
| 18             | 281.1                         | 35.6                  | 4.41 | 0.0039                | 114 →122(+42%) 114 →<br>121(+19%) 113 →121(15%)             |
| 19             | 276.8                         | 36.1                  | 4.48 | 0.1389                | 112 →117(+77%) 111 →<br>116(+12%) 113 →118(+6%)             |
| 20             | 275.0                         | 36.4                  | 4.51 | 0.0349                | 111 →116(+78%) 112 →117(7%)<br>110 →116(5%)                 |
| 21             | 273.5                         | 36.6                  | 4.53 | 0.0166                | 114 →120(+65%) 114 →<br>122(+16%) 114 →121(5%)              |
| 22             | 267.0                         | 37.5                  | 4.64 | 0.000                 | 115 →123(+84%) 115 →120(+7%)                                |
| 23             | 263.1                         | 38.0                  | 4.71 | 0.0016                | 114 →123(+46%) 113 →122(32%)<br>113 →121(11%)               |
| 24             | 260.7                         | 38.9                  | 4.76 | 0.0061                | 114 →123(+37%) 113 →<br>122(+35%) 113 →121(+15%)            |

|    |       |      |      |        |                                                                                |
|----|-------|------|------|--------|--------------------------------------------------------------------------------|
| 25 | 257.0 | 38.9 | 4.82 | 0.0449 | 111 →117(+94%)                                                                 |
| 26 | 255.4 | 39.2 | 4.85 | 0.0877 | 110 →116(+84%)                                                                 |
| 27 | 244.5 | 40.9 | 5.07 | 0.2037 | 110 →117(+94%)                                                                 |
| 28 | 242.6 | 41.2 | 5.11 | 0.1022 | 113 →120(+48%) 112 →<br>119(+19%)                                              |
| 29 | 240.8 | 41.5 | 5.15 | 0.0039 | 115 →126(+28%) 112 →<br>119(+24%) 109 →116(+18%) 113<br>→120(5%) 108 →116(+5%) |
| 30 | 240.6 | 41.6 | 5.15 | 0.0065 | 115 →126(+51%) 109 →116(16%)<br>112 →119(7%) 113 →120(+6%)                     |

---

<sup>a</sup> # is the state. <sup>b</sup>E<sub>VER</sub> is the energy of the vertical transition. <sup>c</sup>*f* is the oscillator strength. <sup>d</sup>Assignment; MO# →MO# is the occupied and the virtual orbitals that define the transition. The value and phase (+/-) of the transition coefficient for each transition is given in parentheses.

**Table S9-C.** Calculated triplet excited states of for *mer,cis*-[Re(tpy- $\kappa^3$ N)(CO)<sub>2</sub>(P(OMe)<sub>3</sub>)<sup>+</sup> (9) in acetonitrile.

| # <sup>a</sup> | E <sub>VER</sub> <sup>b</sup> |                       |      | <i>f</i> <sup>c</sup> | Assignment; MO# →MO# <sup>d</sup>                                            |
|----------------|-------------------------------|-----------------------|------|-----------------------|------------------------------------------------------------------------------|
|                | nm                            | 1000 cm <sup>-1</sup> | eV   |                       |                                                                              |
| 1              | 588.0                         | 17.0                  | 2.11 | 0.0000                | 115 →116(+86%) 114 →116(12%)                                                 |
| 2              | 545.5                         | 18.3                  | 2.27 | 0.0000                | 114 →116(+86%) 115 →<br>116(+13%)                                            |
| 3              | 508.0                         | 19.7                  | 2.44 | 0.0000                | 115 →117(+58%) 114 →117(25%)<br>112 →117(+8%)                                |
| 4              | 468.4                         | 21.3                  | 2.65 | 0.0000                | 113 →116(+76%) 115 →<br>117(+14%)                                            |
| 5              | 459.6                         | 21.8                  | 2.70 | 0.0000                | 114 →117(+63%) 115 →<br>117(+23%) 113 →116(12%)                              |
| 6              | 395.7                         | 25.3                  | 3.13 | 0.0000                | 113 →117(+70%) 112 →116(25%)                                                 |
| 7              | 384.5                         | 26.0                  | 3.22 | 0.0000                | 112 →117(+58%) 114 →117(+8%)<br>113 →116(+7%) 110 →116(6%)                   |
| 8              | 374.3                         | 26.7                  | 3.31 | 0.0000                | 112 →116(+56%) 113 →<br>117(+28%)                                            |
| 9              | 368.1                         | 27.2                  | 3.37 | 0.0000                | 115 →119(+43%) 114 →119(20%)<br>115 →118(14%) 112 →117(8%)<br>114 →118(+6%)  |
| 10             | 364.1                         | 27.5                  | 3.41 | 0.0000                | 115 →118(+48%) 114 →118(16%)<br>115 →119(+13%) 112 →116(+6%)<br>114 →119(6%) |

<sup>a</sup> # is the state. <sup>b</sup>E<sub>VER</sub> is the energy of the vertical transition. <sup>c</sup>*f* is the oscillator strength. <sup>d</sup>Assignment; MO# →MO# is the occupied and the virtual orbitals that define the transition. The value and phase (+/-) of the transition coefficient for each transition is given in parentheses.



**Table S9-D. The Fragment Analysis Based on Mullikan Populations for *mer,cis*-[Re(tpy-κ<sup>3</sup>N)(CO)<sub>2</sub>(P(OMe)<sub>3</sub>)<sup>+</sup>]<sup>+</sup> (9) in the Singlet Ground State.<sup>a</sup>**

| molecular orbital                                   | E, eV  | Re    |                |                |                |                                          |                 |                 |                 |                                          |                 | tpy <sup>b</sup>   |                    | CO <sup>c</sup>    |                    | P(OMe) <sub>3</sub> <sup>d</sup> |       |       |       |
|-----------------------------------------------------|--------|-------|----------------|----------------|----------------|------------------------------------------|-----------------|-----------------|-----------------|------------------------------------------|-----------------|--------------------|--------------------|--------------------|--------------------|----------------------------------|-------|-------|-------|
|                                                     |        | s     | P <sub>x</sub> | P <sub>y</sub> | P <sub>z</sub> | d <sub>x<sup>2</sup>-y<sup>2</sup></sub> | d <sub>xy</sub> | d <sub>xz</sub> | d <sub>yz</sub> | d <sub>x<sup>2</sup>-y<sup>2</sup></sub> | d <sub>xy</sub> | ∑ <sub>s,p,d</sub> | ∑ <sub>s,p,d</sub> | ∑ <sub>s,p,d</sub> | ∑ <sub>s,p,d</sub> |                                  |       |       |       |
| 108 (O)                                             | -11.23 | 0.00  | 0.07           | 0.02           | 0.01           | 0.01                                     | 0.00            | 0.04            | 0.02            | 0.23                                     | 0.00            | 0.00               | 0.04               | 0.02               | 0.23               | 26.34                            | 0.37  | 0.37  | 72.91 |
| 109 (O)                                             | -10.94 | 0.00  | -0.04          | 0.00           | 0.03           | 0.03                                     | -0.01           | 0.03            | 0.00            | 0.06                                     | 0.00            | 0.00               | 0.03               | 0.00               | 0.06               | 8.48                             | 0.04  | 0.04  | 91.37 |
| 110 (O)                                             | -10.70 | 0.06  | 0.01           | 0.29           | 0.09           | -0.04                                    | 0.02            | 1.38            | 0.04            | 0.06                                     | 0.00            | 0.02               | 1.38               | 0.04               | 0.06               | 76.94                            | 0.80  | 0.80  | 20.35 |
| 111 (O)                                             | -10.14 | 0.85  | 0.04           | 1.83           | 0.38           | 1.67                                     | 0.03            | 0.16            | 2.54            | 0.05                                     | 0.00            | 0.03               | 0.16               | 2.54               | 0.05               | 18.39                            | 4.16  | 4.16  | 69.90 |
| 112 (O)                                             | -9.90  | 0.14  | 0.03           | 0.26           | 0.04           | 0.20                                     | 0.00            | 0.02            | 0.11            | 1.09                                     | 0.00            | 0.00               | 0.02               | 0.11               | 1.09               | 85.98                            | 0.57  | 0.57  | 11.56 |
| 113 (O)                                             | -9.03  | 0.01  | 0.00           | -0.01          | 0.12           | 8.61                                     | 0.28            | 44.34           | 3.09            | 0.55                                     | 0.00            | 0.28               | 44.34              | 3.09               | 0.55               | 16.32                            | 23.58 | 23.58 | 3.11  |
| 114 (O)                                             | -8.54  | 0.01  | 1.86           | 0.05           | 0.00           | 0.02                                     | 33.21           | 0.09            | 1.01            | 29.58                                    | 0.00            | 33.21              | 0.09               | 1.01               | 29.58              | 14.44                            | 18.79 | 18.79 | 0.96  |
| 115 (O)                                             | -8.39  | -0.01 | 2.95           | -0.02          | 0.00           | 0.00                                     | 31.23           | 0.63            | 1.20            | 32.66                                    | 0.00            | 31.23              | 0.63               | 1.20               | 32.66              | 12.22                            | 17.48 | 17.48 | 1.65  |
| HOMO-LUMO gap: 2.727 eV (21995.8 cm <sup>-1</sup> ) |        |       |                |                |                |                                          |                 |                 |                 |                                          |                 |                    |                    |                    |                    |                                  |       |       |       |
| 116 (V)                                             | -5.66  | 0.01  | 0.04           | 1.36           | 0.19           | 0.55                                     | 0.02            | 1.20            | 0.72            | 0.03                                     | 0.00            | 0.02               | 1.20               | 0.72               | 0.03               | 89.41                            | 4.18  | 4.18  | 2.29  |
| 117 (V)                                             | -5.26  | 0.00  | 0.01           | 0.02           | 0.00           | 0.01                                     | 0.02            | 0.01            | 0.08            | 2.29                                     | 0.00            | 0.02               | 0.01               | 0.08               | 2.29               | 96.48                            | 0.92  | 0.92  | 0.18  |
| 118 (V)                                             | -4.25  | 0.02  | 0.26           | 0.24           | 0.08           | 0.00                                     | 0.01            | -0.01           | 0.15            | 0.72                                     | 0.00            | 0.01               | -0.01              | 0.15               | 0.72               | 95.53                            | 1.26  | 1.26  | 1.73  |
| 119 (V)                                             | -4.09  | 0.00  | 0.30           | 0.30           | 0.00           | 0.00                                     | 0.01            | 0.00            | 0.01            | 1.23                                     | 0.00            | 0.01               | 0.00               | 0.01               | 1.23               | 95.30                            | 2.65  | 2.65  | 0.20  |
| 120 (V)                                             | -3.48  | 0.00  | 0.20           | 0.22           | 0.01           | 0.05                                     | 0.05            | 0.11            | 0.09            | 0.00                                     | 0.00            | 0.05               | 0.11               | 0.09               | 0.00               | 96.09                            | 2.29  | 2.29  | 0.89  |
| 121 (V)                                             | -3.21  | 0.08  | 0.39           | 4.74           | 15.84          | 4.61                                     | 0.12            | 0.60            | -0.13           | -0.01                                    | 0.00            | 0.12               | 0.60               | -0.13              | -0.01              | 2.24                             | 41.25 | 41.25 | 30.28 |
| 122 (V)                                             | -3.08  | -0.07 | 21.88          | 0.23           | 0.87           | 0.26                                     | 5.97            | 0.00            | 0.14            | 1.26                                     | 0.00            | 5.97               | 0.00               | 0.14               | 1.26               | 2.54                             | 30.41 | 30.41 | 36.51 |
| 126 (V)                                             | -1.81  | 7.33  | -0.01          | 2.67           | 1.78           | 9.19                                     | 0.35            | 5.09            | 7.82            | 0.13                                     | 0.00            | 0.35               | 5.09               | 7.82               | 0.13               | 16.66                            | 20.06 | 20.06 | 28.93 |

<sup>a</sup>The orbital occupancy status is given in parenthesis (O = occupied, V = virtual). <sup>b</sup>Sum of the percent population for the three nitrogen, fifteen carbon, and eleven hydrogen atoms present in the terpyridine (2,2';6',2''-terpyridine (tpy)); C<sub>15</sub>H<sub>11</sub>N<sub>3</sub> ligand. <sup>c</sup>Sum of the percent population for the two carbon and two oxygen atoms present in the two carbonyl (CO) ligands. <sup>d</sup>Sum of the percent population for the one phosphorus (P) atom, three oxygen, three carbon, and nine hydrogen atoms present in the trimethylphosphite (POMe<sub>3</sub>) ligand.

**Table S10-A.** Optimized geometry of *mer,cis*-[Re(tpy- $\kappa^3$ N)(CO)<sub>2</sub>(P(OEt)<sub>3</sub>)]<sup>+</sup> (10) in the singlet ground state with E(B3LYP) = - 1852.8749 au.

|    |             |             |             |
|----|-------------|-------------|-------------|
| Re | 0.41284227  | -0.13412476 | -0.21022674 |
| N  | -1.72377568 | -0.42889321 | -0.18271138 |
| C  | -2.52069965 | -0.62863281 | -1.25341638 |
| C  | -2.30847076 | -0.34018905 | 1.05566658  |
| C  | -3.90164999 | -0.75920618 | -1.15518463 |
| H  | -2.01341453 | -0.67499992 | -2.21258448 |
| C  | -3.68995240 | -0.46923330 | 1.21270964  |
| C  | -4.50041745 | -0.68340492 | 0.10152374  |
| H  | -4.48967921 | -0.91360802 | -2.05707053 |
| H  | -4.13296384 | -0.39284071 | 2.20224465  |
| H  | -5.57823720 | -0.78011077 | 0.21573427  |
| N  | -0.10153206 | 0.09205768  | 1.81902670  |
| C  | -1.39270862 | -0.07578445 | 2.18550081  |
| C  | 0.87784810  | 0.34461144  | 2.71556948  |
| C  | -1.75018423 | 0.01403227  | 3.53331281  |
| C  | 0.56725992  | 0.44621538  | 4.07421550  |
| C  | -0.75735652 | 0.27824054  | 4.47664264  |
| H  | -2.78079008 | -0.12041510 | 3.84987985  |
| H  | 1.33882973  | 0.64987661  | 4.81153493  |
| H  | -1.01751122 | 0.35309041  | 5.53068496  |
| C  | 0.88877393  | -0.47415159 | -2.04096037 |
| O  | 1.17992326  | -0.70005409 | -3.14996273 |
| C  | 0.17047114  | 1.73704481  | -0.68943016 |
| O  | 0.03917961  | 2.84166496  | -1.01420830 |
| C  | 2.21888441  | 0.50049512  | 2.11394317  |
| C  | 3.34988062  | 0.83896883  | 2.85941453  |
| N  | 2.29344694  | 0.31920784  | 0.75592858  |
| C  | 4.57770643  | 1.00725577  | 2.22571137  |
| H  | 3.26886047  | 0.98069466  | 3.93393823  |
| C  | 3.48731274  | 0.49391215  | 0.15156144  |
| C  | 4.64344562  | 0.83607086  | 0.84391019  |
| H  | 5.46220302  | 1.27551189  | 2.80000707  |
| H  | 3.49121155  | 0.35588138  | -0.92555993 |
| H  | 5.57500170  | 0.96757645  | 0.29808286  |
| P  | 0.74626543  | -2.54923107 | 0.25085350  |
| O  | 1.70422128  | -3.45685038 | -0.70563414 |
| O  | -0.56754450 | -3.50845842 | 0.25613907  |
| O  | 1.28609050  | -2.76281292 | 1.76406198  |
| C  | 1.44920796  | -4.08796331 | 2.35780817  |
| H  | 0.45193371  | -4.52007854 | 2.50053331  |
| H  | 2.00719882  | -4.72167799 | 1.65688625  |
| C  | 3.04312447  | -3.05281709 | -1.09552111 |
| H  | 2.97272033  | -2.15955054 | -1.72849976 |
| H  | 3.61965115  | -2.80627123 | -0.19226740 |

|   |             |             |             |
|---|-------------|-------------|-------------|
| C | -1.12723509 | -4.05917075 | -0.96687335 |
| H | -0.40548812 | -4.76802581 | -1.38874348 |
| H | -1.27809259 | -3.24817711 | -1.69431661 |
| C | 3.67273636  | -4.20822530 | -1.85147080 |
| H | 4.68762428  | -3.93480773 | -2.16920310 |
| H | 3.73607799  | -5.10307578 | -1.22002511 |
| H | 3.08516502  | -4.45007969 | -2.74548377 |
| C | 2.18717441  | -3.92169670 | 3.67216256  |
| H | 1.62478721  | -3.27357679 | 4.35644322  |
| H | 2.31298502  | -4.90106515 | 4.15251435  |
| H | 3.18182451  | -3.48610474 | 3.51328668  |
| C | -2.43890063 | -4.73511526 | -0.61561084 |
| H | -2.87676465 | -5.18440070 | -1.51681548 |
| H | -2.28011685 | -5.53054891 | 0.12293527  |
| H | -3.15562741 | -4.01366366 | -0.20288007 |

**Table S10-B.** Calculated singlet excited states of for *mer,cis*-[Re(tpy- $\kappa^3N$ )(CO)<sub>2</sub>(P(OEt)<sub>3</sub>)<sup>+</sup> (10) in acetonitrile.

| # <sup>a</sup> | E <sub>VER</sub> <sup>b</sup> |                       |      | <i>f</i> <sup>c</sup> | Assignment; MO# →MO# <sup>d</sup>                                                   |
|----------------|-------------------------------|-----------------------|------|-----------------------|-------------------------------------------------------------------------------------|
|                | nm                            | 1000 cm <sup>-1</sup> | eV   |                       |                                                                                     |
| 1              | 561.1                         | 17.8                  | 2.21 | 0.01                  | 127 →128(+99%)                                                                      |
| 2              | 524.5                         | 19.1                  | 2.36 | 0.0183                | 126 →128(+99%)                                                                      |
| 3              | 467.9                         | 21.4                  | 2.65 | 0.0046                | 127 →129(+93%)                                                                      |
| 4              | 443.1                         | 22.6                  | 2.8  | 0.0042                | 126 →129(+85%) 125 →128(13%)                                                        |
| 5              | 401.7                         | 24.9                  | 3.09 | 0.0851                | 125 →128(+78%) 126 →<br>129(+10%)                                                   |
| 6              | 378.5                         | 26.4                  | 3.28 | 0.0158                | 125 →129(+97%)                                                                      |
| 7              | 348.6                         | 28.7                  | 3.56 | 0.0098                | 127 →130(+90%)                                                                      |
| 8              | 346.2                         | 28.9                  | 3.58 | 0.005                 | 127 →131(+80%) 126 →131(15%)                                                        |
| 9              | 335.5                         | 29.8                  | 3.7  | 0.0008                | 126 →130(+74%) 124 →128(18%)<br>126 →131(+7%)                                       |
| 10             | 322.9                         | 31                    | 3.84 | 0.0373                | 126 →131(+70%) 127 →<br>131(+13%)<br>126 →130(7%)                                   |
| 11             | 311.3                         | 32.1                  | 3.98 | 0.5205                | 124 →128(+67%) 126 →<br>130(+11%)                                                   |
| 12             | 305.3                         | 32.8                  | 4.06 | 0.0803                | 127 →133(+68%) 127 →134(7%)<br>127 →132(6%) 126 →133(6%)<br>124 →128(5%)            |
| 13             | 301.2                         | 33.2                  | 4.12 | 0.0028                | 126 →133(+65%) 126 →134(11%)<br>126 →132(10%) 127 →133(+7%)<br>127 →134(+66%) 127 → |
| 14             | 293.7                         | 34.1                  | 4.22 | 0.0193                | 133(+11%)<br>125 →130(+9%) 127 →132(+7%)                                            |
| 15             | 293.4                         | 34.1                  | 4.23 | 0.0203                | 125 →130(+51%) 125 →131(39%)                                                        |
| 16             | 292.2                         | 34.2                  | 4.24 | 0.012                 | 125 →131(+56%) 125 →<br>130(+33%)                                                   |
| 17             | 284.7                         | 35.1                  | 4.36 | 0.0112                | 127 →132(+73%) 127 →134(12%)<br>127 →135(5%)                                        |
| 18             | 281.3                         | 35.6                  | 4.41 | 0.0127                | 123 →128(+67%) 126 →134(16%)<br>126 →134(+29%) 123 →<br>128(+27%)                   |
| 19             | 279.5                         | 35.8                  | 4.44 | 0.0186                | 125 →133(+14%) 126 →<br>133(+11%)<br>126 →132(+7%)                                  |
| 20             | 276.8                         | 36.1                  | 4.48 | 0.1502                | 124 →129(+83%) 125 →130(+6%)                                                        |
| 21             | 274.5                         | 36.4                  | 4.52 | 0.0155                | 126 →132(+68%) 126 →134(15%)                                                        |

|    |       |      |      |        |                                                                                           |
|----|-------|------|------|--------|-------------------------------------------------------------------------------------------|
| 22 | 267.3 | 37.4 | 4.64 | 0.0000 | 127 →135(+85%) 127 →132(+6%)                                                              |
| 23 | 263.1 | 38   | 4.71 | 0.0041 | 126 →135(+61%) 125 →134(22%)                                                              |
| 24 | 261.4 | 38.3 | 4.74 | 0.0232 | 123 →129(+95%)                                                                            |
| 25 | 260.4 | 38.4 | 4.76 | 0.004  | 125 →134(+51%) 126 →<br>135(+23%)<br>125 →133(+15%)                                       |
| 26 | 255.9 | 39.1 | 4.85 | 0.0802 | 122 →128(+86%)                                                                            |
| 27 | 245.4 | 40.8 | 5.05 | 0.2152 | 122 →129(+93%)                                                                            |
| 28 | 244.3 | 40.9 | 5.08 | 0.0023 | 121 →128(+87%) 125 →132(6%)                                                               |
| 29 | 243.3 | 41.1 | 5.1  | 0.1087 | 125 →132(+51%) 124 →<br>131(+17%)                                                         |
| 30 | 240.8 | 41.5 | 5.15 | 0.0209 | 124 →131(+25%) 124 →130(21%)<br>125 →132(11%) 120 →128(+10%)<br>127 →138(7%) 119 →128(5%) |

<sup>a</sup> # is the state. <sup>b</sup>E<sub>VER</sub> is the energy of the vertical transition. <sup>c</sup>*f* is the oscillator strength. <sup>d</sup>Assignment; MO# →MO# is the occupied and the virtual orbitals that define the transition. The value and phase (+/-) of the transition coefficient for each transition is given in parentheses.

**Table S10-C.** Calculated triplet excited states of for *mer,cis*-[Re(tpy- $\kappa^3$ N)(CO)<sub>2</sub>(P(OEt)<sub>3</sub>)<sup>+</sup> (10) in acetonitrile.

| # <sup>a</sup> | E <sub>VER</sub> <sup>b</sup> |                       |      | <i>f</i> <sup>c</sup> | Assignment; MO# →MO# <sup>d</sup>                                                      |
|----------------|-------------------------------|-----------------------|------|-----------------------|----------------------------------------------------------------------------------------|
|                | nm                            | 1000 cm <sup>-1</sup> | eV   |                       |                                                                                        |
| 1              | 592.9                         | 16.9                  | 2.09 | 0.0000                | 127 →128(+86%) 126 →<br>128(+11%)                                                      |
| 2              | 548.9                         | 18.2                  | 2.26 | 0.0000                | 126 →128(+87%) 127 →128(12%)                                                           |
| 3              | 511.8                         | 19.5                  | 2.42 | 0.0000                | 127 →129(+60%) 126 →<br>129(+23%)<br>124 →129(+8%)                                     |
| 4              | 471.9                         | 21.2                  | 2.63 | 0.0000                | 125 →128(+79%) 127 →<br>129(+12%)                                                      |
| 5              | 462.5                         | 21.6                  | 2.68 | 0.0000                | 126 →129(+66%) 127 →129(23%)<br>125 →128(+9%)                                          |
| 6              | 398.0                         | 25.1                  | 3.12 | 0.0000                | 125 →129(+76%) 124 →128(20%)                                                           |
| 7              | 385.4                         | 25.9                  | 3.22 | 0.0000                | 124 →129(+57%) 126 →129(8%)<br>122 →128(6%) 125 →128(+6%)                              |
| 8              | 375.0                         | 26.7                  | 3.31 | 0.0000                | 124 →128(+58%) 125 →<br>129(+22%)<br>122 →129(6%)                                      |
| 9              | 370.4                         | 27.0                  | 3.35 | 0.0000                | 127 →131(+38%) 127 →130(19%)<br>126 →131(+16%) 124 →129(10%)<br>126 →130(7%)           |
| 10             | 366.0                         | 27.3                  | 3.39 | 0.0000                | 127 →130(+43%) 127 →<br>131(+19%)<br>126 →130(+13%) 124 →<br>128(+8%)<br>126 →131(+7%) |

<sup>a</sup> # is the state. <sup>b</sup>E<sub>VER</sub> is the energy of the vertical transition. <sup>c</sup>*f* is the oscillator strength. <sup>d</sup>Assignment; MO# →MO# is the occupied and the virtual orbitals that define the transition. The value and phase (+/-) of the transition coefficient for each transition is given in parentheses.

**Table S10-D. The Fragment Analysis Based on Mulliken Populations for *mer,cis*-[Re(tpy-κ<sup>3</sup>N)(CO)<sub>2</sub>(P(OEt)<sub>3</sub>)<sup>+</sup> (10) in the Singlet Ground State.<sup>a</sup>**

| molecular orbital                                  | <i>E</i> , eV | Re          |                      |                      |                      |                                  |                       |                                                |                       |              |              | tpy <sup>b</sup><br>∑ <sub>sp,d</sub> | CO <sup>c</sup><br>∑ <sub>sp,d</sub> | P(OEt) <sub>3</sub> <sup>d</sup><br>∑ <sub>sp,d</sub> |  |
|----------------------------------------------------|---------------|-------------|----------------------|----------------------|----------------------|----------------------------------|-----------------------|------------------------------------------------|-----------------------|--------------|--------------|---------------------------------------|--------------------------------------|-------------------------------------------------------|--|
|                                                    |               | <i>s</i>    | <i>P<sub>x</sub></i> | <i>P<sub>y</sub></i> | <i>P<sub>z</sub></i> | <i>d<sub>x</sub><sup>2</sup></i> | <i>d<sub>yz</sub></i> | <i>d<sub>x<sup>2</sup>-y<sup>2</sup></sub></i> | <i>d<sub>xy</sub></i> |              |              |                                       |                                      |                                                       |  |
| 119 (O)                                            | -10.47        | 0.00        | 1.97                 | -0.02                | 0.13                 | 0.03                             | 0.02                  | 0.19                                           | 0.03                  | 1.84         | 82.51        | 2.70                                  | 10.59                                |                                                       |  |
| 120 (O)                                            | -10.30        | -0.02       | 0.00                 | 0.01                 | 1.11                 | 0.20                             | 0.02                  | 2.34                                           | -0.09                 | 0.01         | 93.36        | 0.88                                  | 2.18                                 |                                                       |  |
| 121 (O)                                            | -9.65         | -0.04       | 0.08                 | 0.08                 | 0.47                 | 1.11                             | 0.10                  | 8.87                                           | 0.20                  | 0.59         | 71.59        | 10.55                                 | 6.40                                 |                                                       |  |
| 122 (O)                                            | -9.22         | -0.05       | 0.06                 | 0.12                 | 0.05                 | 2.69                             | 0.07                  | 23.32                                          | 0.68                  | 0.42         | 54.52        | 2.71                                  | 15.42                                |                                                       |  |
| 123 (O)                                            | -8.85         | 0.01        | 0.36                 | 0.03                 | 0.11                 | 0.07                             | 0.25                  | 0.37                                           | 2.15                  | 22.34        | 51.53        | 1.39                                  | 21.38                                |                                                       |  |
| 124 (O)                                            | -8.50         | 0.01        | 0.15                 | 0.00                 | 0.11                 | 0.09                             | 0.00                  | 0.70                                           | 1.67                  | 14.45        | 62.63        | 5.62                                  | 14.57                                |                                                       |  |
| 125 (O)                                            | -8.25         | 0.00        | 3.36                 | 0.18                 | 0.88                 | 9.91                             | 50.68                 | 1.22                                           | 2.16                  | 0.86         | 28.26        | 0.68                                  | 1.81                                 |                                                       |  |
| 126 (O)                                            | -5.40         | 0.42        | 2.48                 | 0.95                 | 18.22                | 1.44                             | 0.14                  | 0.00                                           | 4.15                  | 1.44         | 44.54        | 1.04                                  | 25.17                                |                                                       |  |
| <b>127 (O)</b>                                     | <b>-5.16</b>  | <b>0.45</b> | <b>8.96</b>          | <b>2.84</b>          | <b>7.31</b>          | <b>-0.26</b>                     | <b>0.79</b>           | <b>0.34</b>                                    | <b>0.10</b>           | <b>1.93</b>  | <b>47.80</b> | <b>1.90</b>                           | <b>27.87</b>                         |                                                       |  |
| HOMO-LUMO gap: 1.069 eV (8618.8 cm <sup>-1</sup> ) |               |             |                      |                      |                      |                                  |                       |                                                |                       |              |              |                                       |                                      |                                                       |  |
| <b>128 (V)</b>                                     | <b>-4.09</b>  | <b>0.72</b> | <b>3.26</b>          | <b>1.51</b>          | <b>6.82</b>          | <b>0.35</b>                      | <b>0.74</b>           | <b>0.13</b>                                    | <b>3.46</b>           | <b>-0.32</b> | <b>61.69</b> | <b>4.93</b>                           | <b>17.66</b>                         |                                                       |  |
| 129 (V)                                            | -3.98         | 0.16        | 3.80                 | 0.26                 | 8.70                 | -0.23                            | 0.61                  | 0.15                                           | 5.10                  | 1.37         | 35.31        | 2.50                                  | 42.27                                |                                                       |  |
| 130 (V)                                            | -3.60         | 1.54        | 5.44                 | 0.22                 | 0.24                 | 0.00                             | 1.14                  | 0.99                                           | 1.11                  | 1.72         | 23.30        | 0.48                                  | 63.84                                |                                                       |  |
| 131 (V)                                            | -3.58         | 4.03        | 3.18                 | 15.21                | 0.99                 | 0.22                             | 0.31                  | 3.22                                           | 0.66                  | 0.53         | 16.63        | 0.52                                  | 54.50                                |                                                       |  |
| 132 (V)                                            | -3.14         | 0.00        | 0.48                 | 0.02                 | 0.00                 | 0.03                             | 0.16                  | 0.00                                           | 0.50                  | 0.60         | 90.73        | 2.15                                  | 5.33                                 |                                                       |  |
| 133 (V)                                            | -3.09         | 0.00        | 0.67                 | 0.06                 | 0.70                 | -0.14                            | 0.09                  | -0.20                                          | 0.00                  | 0.37         | 90.57        | 1.32                                  | 6.55                                 |                                                       |  |
| 134 (V)                                            | -2.62         | 3.77        | 0.52                 | 2.99                 | 0.26                 | -2.95                            | 0.54                  | 0.55                                           | 5.95                  | 1.31         | 39.83        | 1.31                                  | 45.91                                |                                                       |  |
| 135 (V)                                            | -2.52         | 2.72        | 0.16                 | -1.01                | 5.56                 | 2.10                             | 0.20                  | 4.45                                           | 6.52                  | 0.39         | 52.98        | 2.05                                  | 23.87                                |                                                       |  |
| 138 (V)                                            | -2.16         | -0.08       | 0.43                 | 1.56                 | 3.84                 | 1.99                             | 0.48                  | 0.52                                           | 1.82                  | 0.30         | 55.28        | 2.95                                  | 30.92                                |                                                       |  |

<sup>a</sup>The orbital occupancy status is given in parenthesis (O = occupied, V = virtual). <sup>b</sup>Sum of the percent population for the three nitrogen, fifteen carbon, and eleven hydrogen atoms present in the terpyridine (2,2';6,2''-terpyridine (tpy); C<sub>15</sub>H<sub>11</sub>N<sub>3</sub>) ligand. <sup>c</sup>Sum of the percent population for the two carbon and two oxygen atoms present in the two carbonyl (CO) ligands. <sup>d</sup>Sum of the percent population for the one phosphorus (P) atom, three oxygen, six carbon, and fifteen hydrogen atoms present in the triethylphosphite (POMe<sub>3</sub>) ligand.

## 2. Electrochemical Parameterization

**Table S11.** Calculated values  $E$  and  $\sum E_L(L)$ .

| vs. NHE                                                                                      | $\sum E_L(L)$ | $E_{CALC}$ | $E_{OBS}$ | $E_{DIFF}$ |
|----------------------------------------------------------------------------------------------|---------------|------------|-----------|------------|
| Re(tpy- $\kappa^3N$ )Cl <sub>3</sub> (Harman)                                                | 0.03          | -0.92      | -1.51     | 0.59       |
| [Re(tpy- $\kappa^3N$ )(PPh <sub>3</sub> )Cl <sub>2</sub> ] <sup>+</sup> (Harman)             | 0.66          | -0.45      | -1.32     | 0.87       |
| [Re(tpy- $\kappa^3N$ )(PPh <sub>3</sub> ) <sub>2</sub> Cl] <sup>+</sup> (Harman)             | 1.29          | 0.03       | -0.99     | 1.02       |
| [Re(tpy- $\kappa^3N$ )(PPh <sub>3</sub> )(bpy)] <sup>+</sup> (Harman)                        | 1.66          | 0.31       | -0.14     | 0.45       |
| [Re(tpy- $\kappa^3N$ )(PPh <sub>3</sub> )( $\eta^2$ -cyclohexenone)] <sup>+</sup> (Harman)   | 1.66          | 0.31       | 0.04      | 0.27       |
| <i>mer,cis</i> -Re(tpy- $\kappa^3N$ )(CO) <sub>2</sub> Cl                                    | 1.99          | 0.56       | 0.239     | 0.32       |
| <i>mer,cis</i> -[Re(tpy- $\kappa^3N$ )(CO) <sub>2</sub> (PMe <sub>3</sub> )] <sup>+</sup>    | 2.56          | 0.995      | 0.599     | 0.40       |
| <i>mer,cis</i> -[Re(tpy- $\kappa^3N$ )(CO) <sub>2</sub> (PEt <sub>3</sub> )] <sup>+</sup>    | 2.57          | 1.003      | 0.609     | 0.39       |
| <i>mer,cis</i> -[Re(tpy- $\kappa^3N$ )(CO) <sub>2</sub> (P(OMe) <sub>3</sub> )] <sup>+</sup> | 2.65          | 1.064      | 0.679     | 0.39       |
| <i>mer,cis</i> -[Re(tpy- $\kappa^3N$ )(CO) <sub>2</sub> (PPh <sub>3</sub> )] <sup>+</sup>    | 2.62          | 1.041      | 0.699     | 0.34       |



### 3. UV/vis Spectra

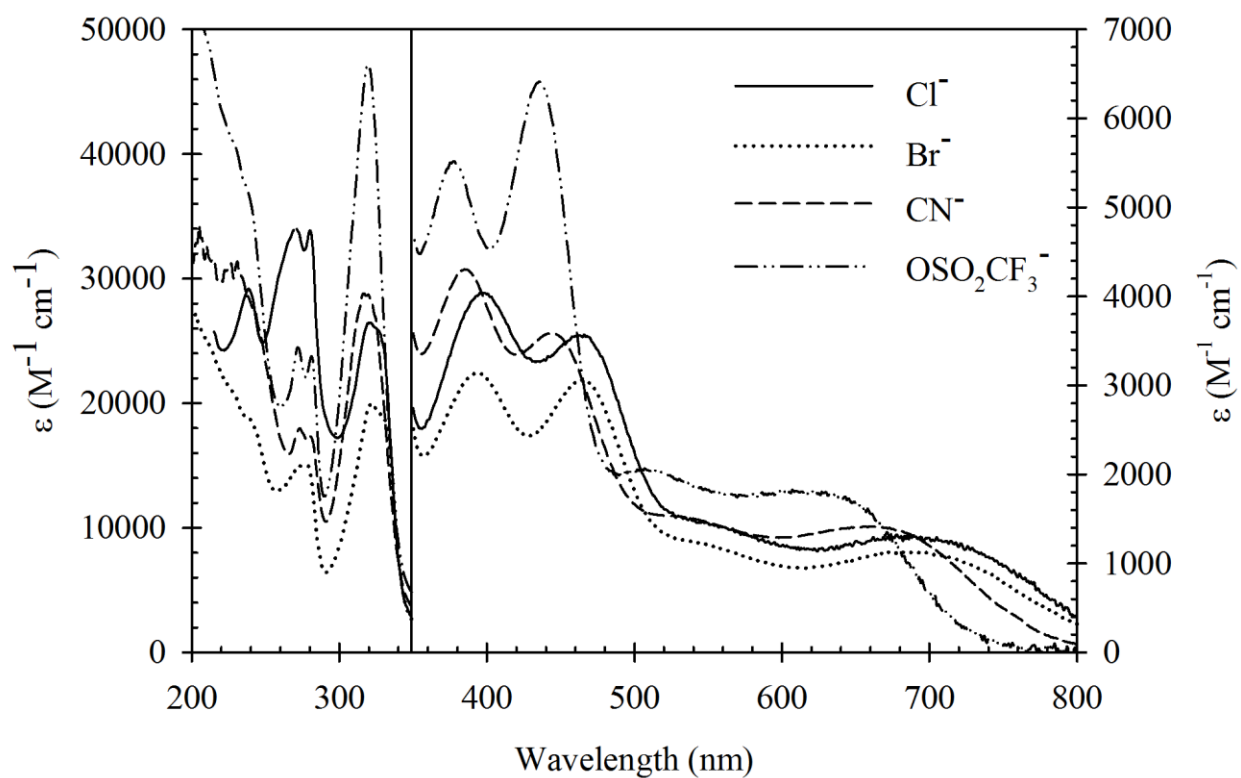

**Figure S1.** UV/vis spectra of *mer,cis*-Re(tpy- $\kappa^3N$ )(CO)<sub>2</sub>L (where L = Cl<sup>-</sup>, Br<sup>-</sup>, OSO<sub>2</sub>CF<sub>3</sub><sup>-</sup> and CN<sup>-</sup>) complexes.

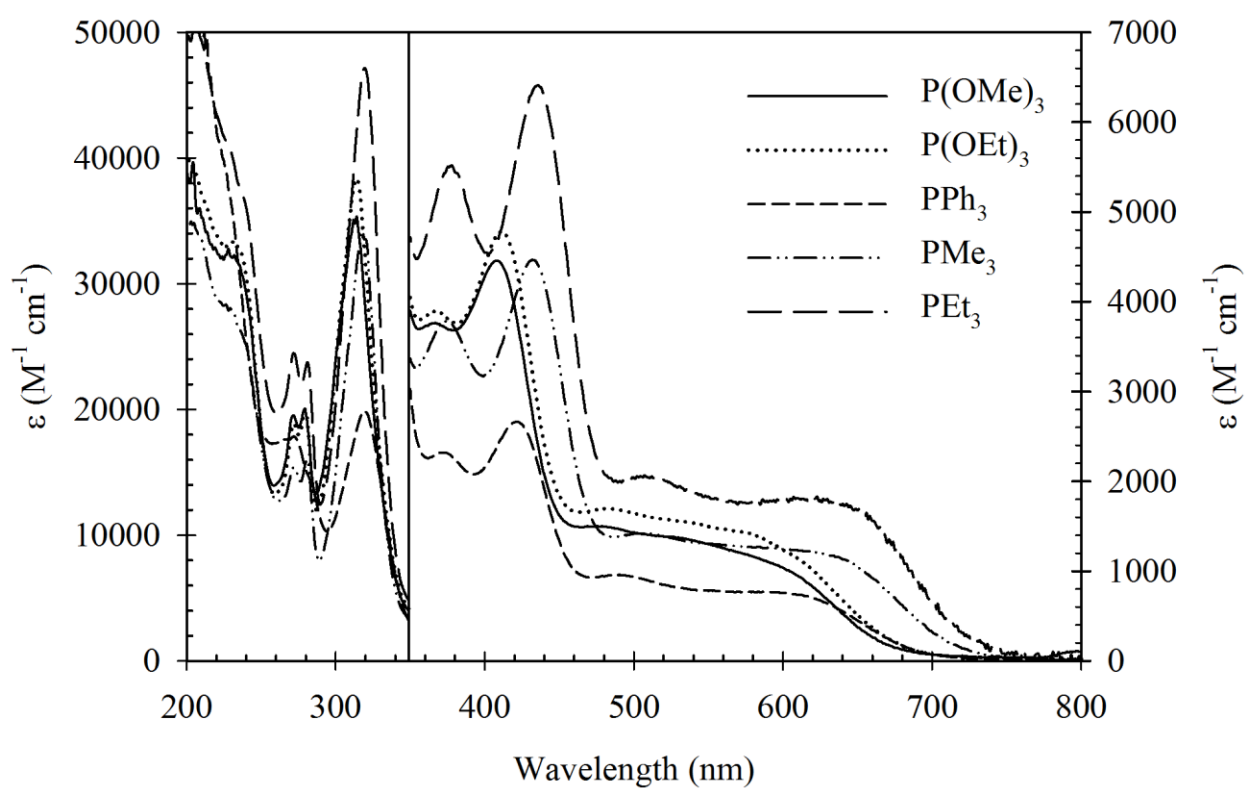

**Figure S2.** UV/vis spectra of *mer,cis*-[Re(tpy- $\kappa^3$ N)(CO)<sub>2</sub>(L)]<sup>+</sup> (where L = P(OMe)<sub>3</sub>, P(OEt)<sub>3</sub>, PPh<sub>3</sub>, PMe<sub>3</sub> and PEt<sub>3</sub>) complexes.

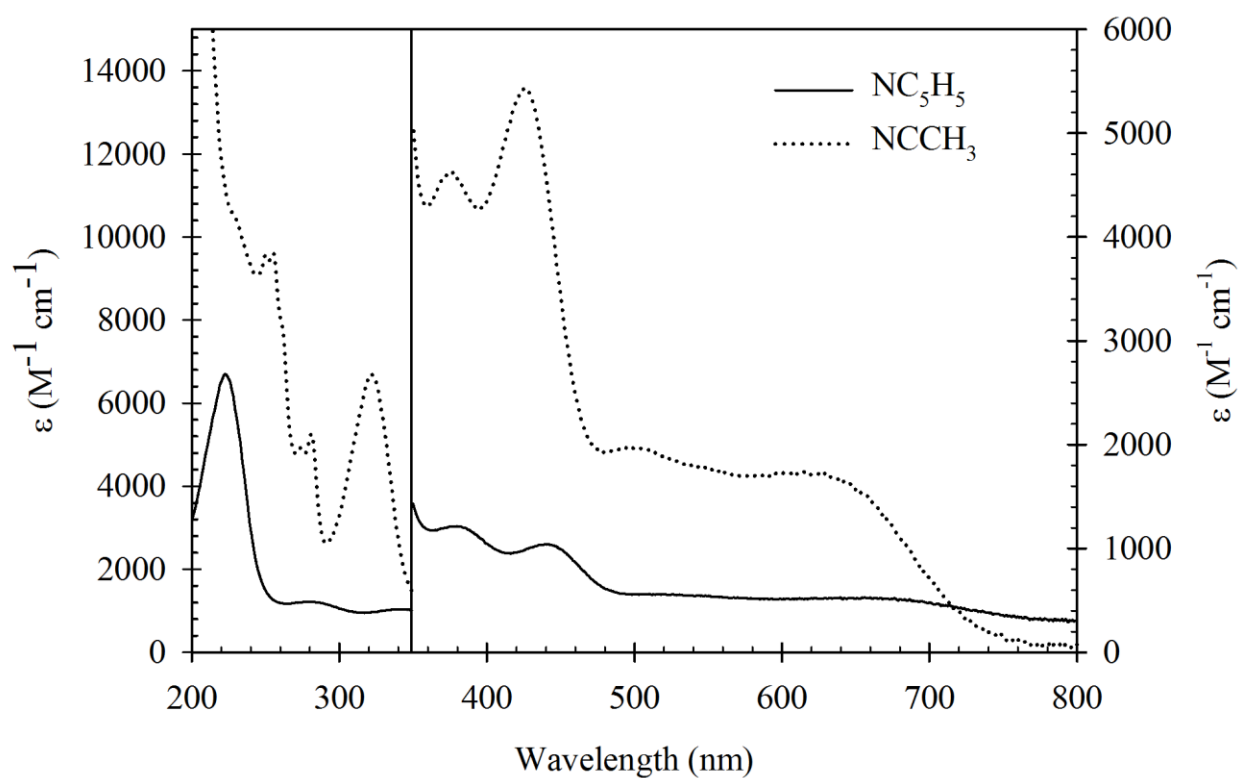

**Figure S3.** UV/vis spectra of *mer,cis*-[Re(tpy- $\kappa^3N$ )(CO)<sub>2</sub>(L)]<sup>+</sup> (where L = NC<sub>5</sub>H<sub>5</sub> and NCCH<sub>3</sub>) complexes.

#### 4. Nuclear Magnetic Resonance (NMR) Spectra

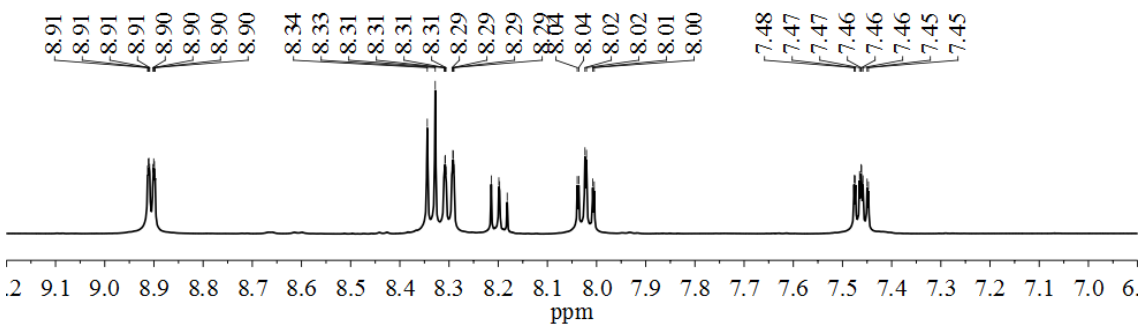

$^1\text{H}$  NMR of *mer,cis*- $\text{Re}(\text{tpy-}\kappa^3\text{N})(\text{CO})_2\text{Cl}$  (**1**) in  $\text{DMSO-}d_6$ .<sup>[2]</sup>

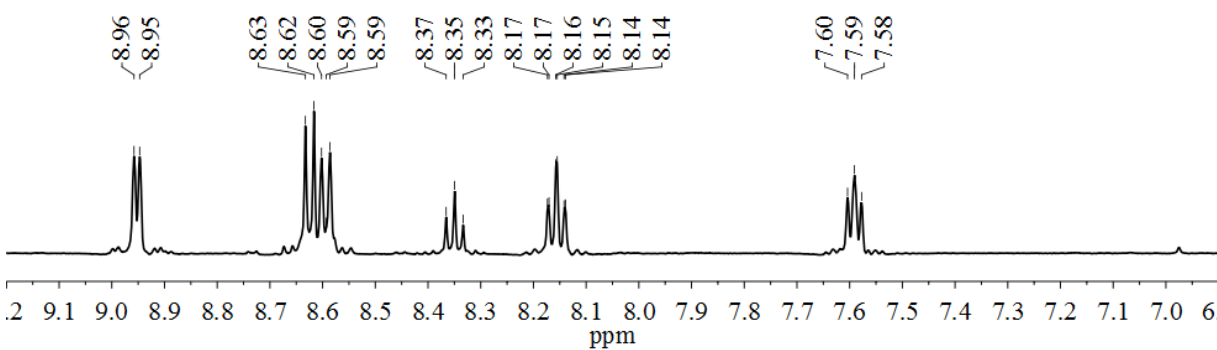

$^1\text{H}$  NMR of *mer,cis*- $\text{Re}(\text{tpy-}\kappa^3\text{N})(\text{CO})_2(\text{CF}_3\text{SO}_3)$  (**2**) in  $\text{DMSO-}d_6$ .<sup>[2]</sup>

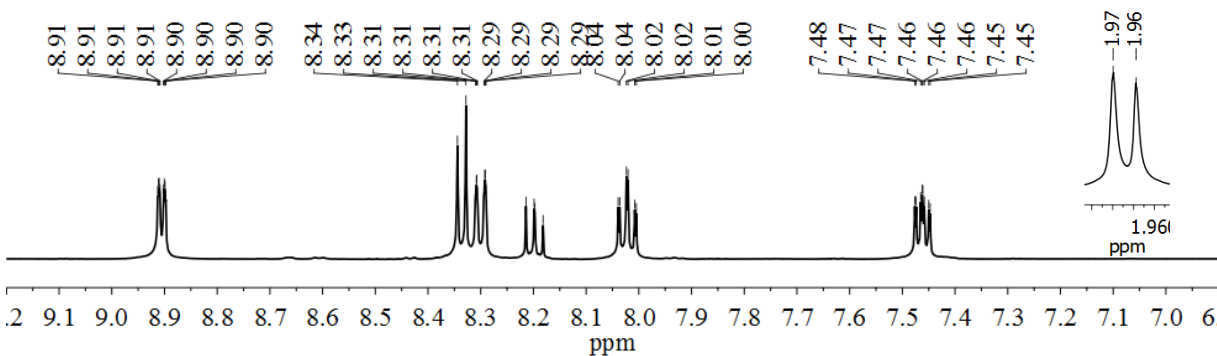

$^1\text{H}$  NMR of *mer,cis*- $[\text{Re}(\text{tpy-}\kappa^3\text{N})(\text{CO})_2(\text{CH}_3\text{CN})]^+\text{CF}_3\text{SO}_3^-$  (**3**) in acetonitrile- $d_3$ .<sup>[2]</sup>

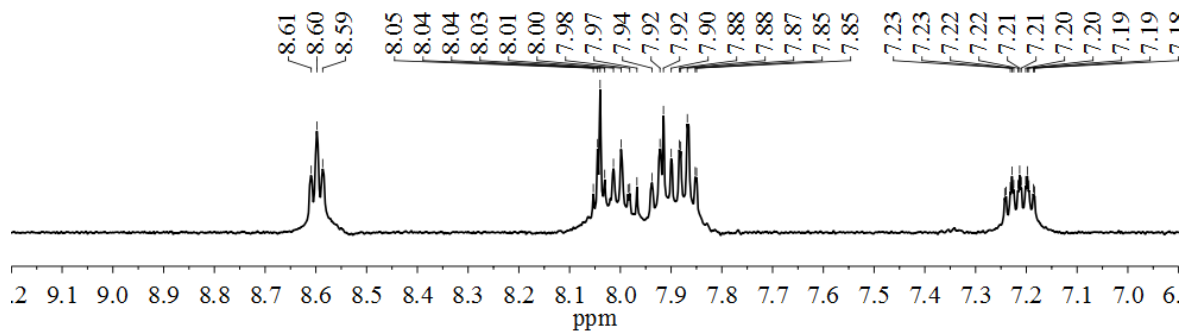

$^1\text{H}$  NMR of *mer,cis*- $\text{Re}(\text{tpy-}\kappa^3\text{N})(\text{CO})_2(\text{CN})$  (**4**) in acetonitrile- $d_3$ .<sup>[2]</sup>

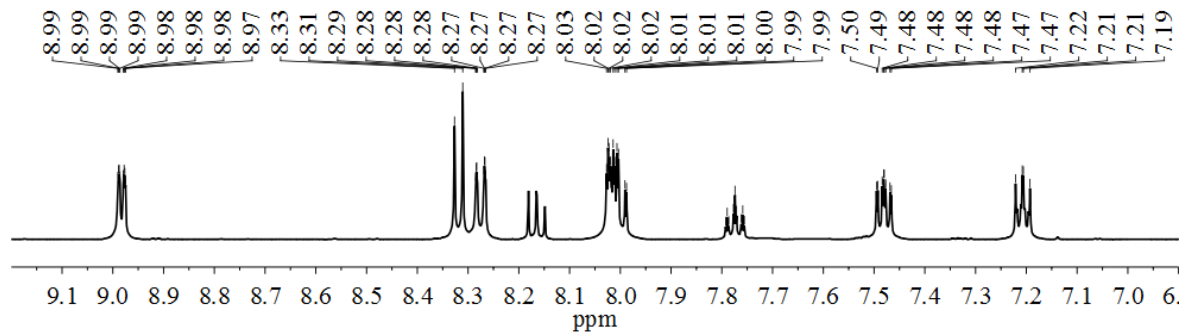

$^1\text{H}$  NMR of *mer,cis*- $[\text{Re}(\text{tpy-}\kappa^3\text{N})(\text{CO})_2(\text{NC}_5\text{H}_5)](\text{CF}_3\text{SO}_3)$  (**5**) in acetonitrile- $d_3$ .<sup>[2]</sup>

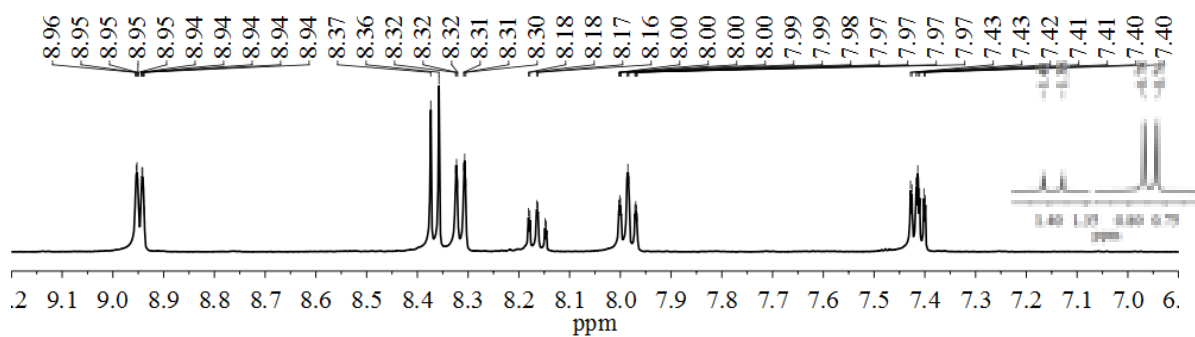

$^1\text{H}$  NMR of *mer,cis*- $[\text{Re}(\text{tpy-}\kappa^3\text{N})(\text{CO})_2(\text{PMe}_3)](\text{CF}_3\text{SO}_3)$  (**6**) in acetonitrile- $d_3$ .<sup>[2]</sup>

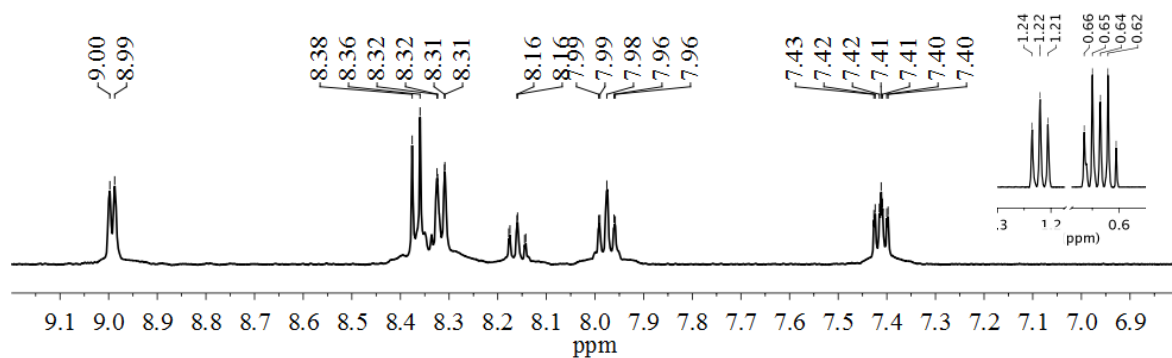

$^1\text{H}$  NMR of *mer,cis*-[Re(tpy- $\kappa^3\text{N}$ )(CO) $_2$ (PEt $_3$ )](CF $_3$ SO $_3$ ) (**7**) in acetonitrile- $d_3$ .

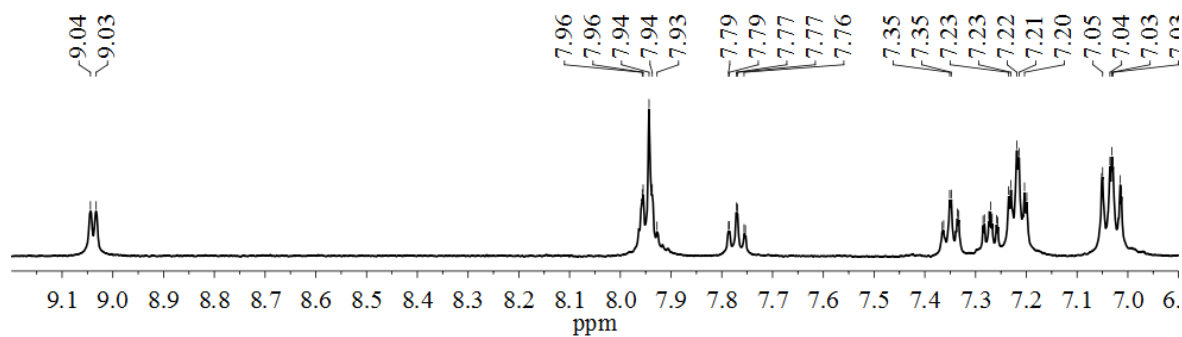

$^1\text{H}$  NMR of *mer,cis*-[Re(tpy- $\kappa^3\text{N}$ )(CO) $_2$ (PPh $_3$ )](CF $_3$ SO $_3$ ) (**8**) in acetonitrile- $d_3$ .

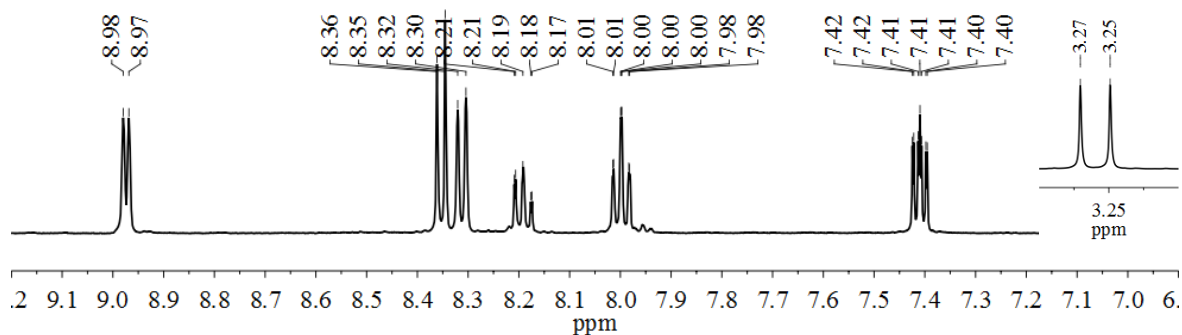

$^1\text{H}$  NMR of *mer,cis*-[Re(tpy- $\kappa^3\text{N}$ )(CO) $_2$ (P(OMe) $_3$ )](CF $_3$ SO $_3$ ) (**9**) in acetonitrile- $d_3$ .

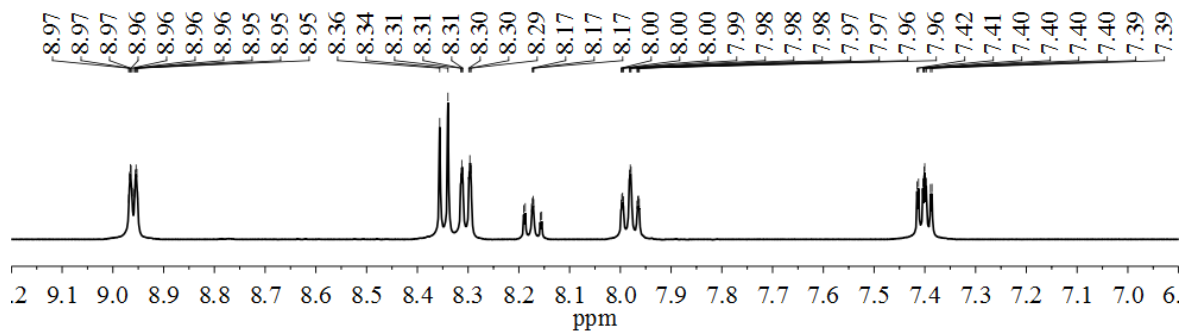

$^1\text{H}$  NMR of *mer,cis*-[Re(tpy- $\kappa^3$ N)(CO) $_2$ (P(OEt) $_3$ )](CF $_3$ SO $_3$ ) (**10**) in acetonitrile- $d_3$ .<sup>2</sup>

**Figure S4.** Individual nuclear magnetic resonance (NMR) spectra for *mer,cis*-[Re(tpy- $\kappa^3$ N)(CO) $_2$ (L)] $^n$  complexes.

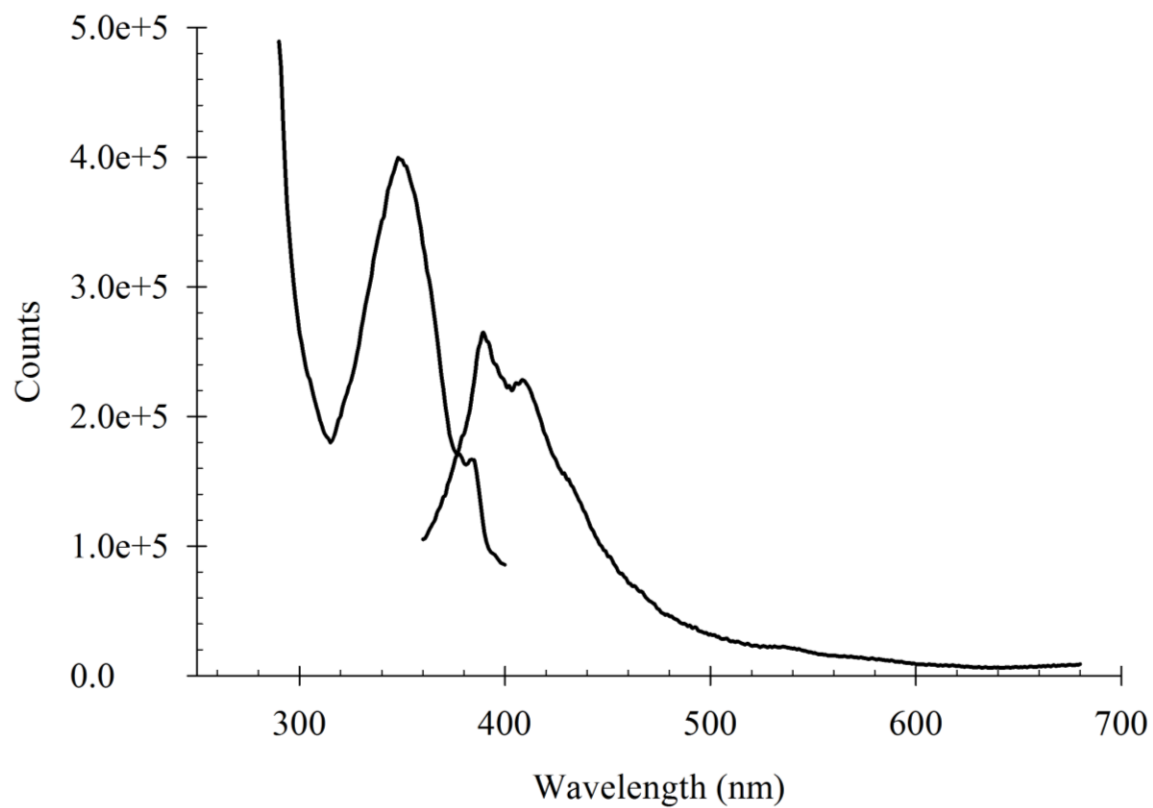

**Figure S5.** Excitation and emission spectra for *mer,cis*-[Re(tpy- $\kappa^3$ N)(CO)<sub>2</sub>(P(OEt)<sub>3</sub>)]<sup>+</sup> (**10**) at 77 K. Excitation:  $\lambda_{EM}$ =425 nm, monitored 290–400 nm; Emission:  $\lambda_{EX}$ =389 nm.
